# Supplementary material for: INTEGRATE: gene fusion discovery using whole genome and transcriptome data
Source: HighWire-hosted journal article supplement (doi:10.1101/gr.186114.114), 2015-11-10
Supplement: Supplemental_Table1.xlsx [file Supplemental_Table1.xlsx]

## Sheet: Sheet1
Supplementary Table 1. Fusion candidates called by 9 methods from HCC1395 cell line.
Note: Coordinates are based on Genome Reference Consortium Human Build 37 (GRCh37).
	Previously reported														OCIAD1
	Not called by INTEGRATE using 2 encompassing RNA-seq reads, but called using 1 encompassing RNA-seq reads
5p_gene	3p_gene	Validated	chr_5p	fusion_junction_5p	chr_3p	fusion_junction_3p	Tier	Encompassing RNA-seq Reads	Spanning RNA-seq Reads	INTEGRATE(GSNAP)	INTEGRATE(TopHat2)	INTEGRATE(STAR)	nFuse	ChimeraScan	FusionCatcher	TopHat-Fusion	pyPRADA	TRUP	Comrad	BreakTrans
EIF3K	CYP39A1	1	19	39123318	6	46607405	1	96	187	1	1	1	1	1	1	1	1	1	1	0
MDH1	RP11-357C3.3	1	2	63826426	X	62619783	1	23	25	1	1	1	0	0	0	1	0	0	0	0
LMF1	FOXK2	1	16	1020788	17	80559179	1	14	19	1	1	1	1	1	1	1	1	1	0	1
GS1-124K5.2	RP11-147C23.1	1	7	65915058	1	96471749	1	2	13	1	1	1	1	0	0	0	0	0	0	0
RNGTT	RPF1	1	6	89559474	1	84946639	1	4	6	1	1	1	1	0	1	0	0	1	0	0
RP11-83A24.2	KCNQ5	1	4	140374839	6	73900296	1	2	2	1	0	0	0	0	0	0	0	0	0	0
PLA2R1	RBMS1	1	2	160832579	2	161159998	1	117	189	1	1	1	1	1	1	1	0	0	1	1
RAB7A	LRCH3	1	3	128445202	3	197592294	1	34	46	1	1	1	1	1	1	1	1	0	1	1
SHISA5	RP11-24C3.2	1	3	48520586	3	48482272	1	36	36	1	1	0	0	0	0	0	0	0	0	0
UNC5C	STPG2	1	4	96199410	4	98162249	1	35	23	1	1	1	1	0	1	0	0	0	0	0
TMEM104	RAB37	1	17	72791771	17	72725395	1	29	16	1	1	1	1	1	1	1	0	0	1	1
MAVS	PANK2	1	20	3843060	20	3888573	1	22	16	1	1	0	0	0	0	0	0	0	0	0
ZNF37BP	CEP164P1	1	10	43046005	10	45561970	1	16	17	1	1	1	1	1	1	0	0	0	0	0
POU2F1	NME7	1	1	167382351	1	169102055	1	16	10	1	1	1	1	1	1	0	0	0	0	0
NRL	DHRS4-AS1	1	14	24583931	14	24410367	1	14	11	0	1	0	0	0	0	0	0	0	0	0
KPNA1	EEFSEC	1	3	122168421	3	127965679	1	6	16	1	1	1	1	1	1	0	1	1	0	0
NOM1	MNX1-AS2	1	7	156756720	7	156799571	1	8	13	1	1	0	0	0	0	0	0	0	0	0
EFTUD2	KIF18B	1	17	42942298	17	43006392	1	11	9	1	1	0	1	1	1	0	0	0	0	0
OSBPL9	RP11-191G24.1	1	1	52179751	1	52026554	1	8	9	1	1	1	0	0	0	0	0	0	0	0
MFSD3	MROH1	1	8	145736286	8	145254025	1	5	9	1	1	1	1	1	1	0	0	0	0	0
WARS	DEGS2	1	14	100826891	14	100616047	1	6	5	1	1	0	1	0	0	0	0	0	0	0
HNRNPUL2	AHNAK	1	11	62484461	11	62201363	1	4	2	1	1	0	0	0	0	0	0	0	0	0
CCDC117	CTA-292E10.6	1	22	29179633	22	29217960	1	4	1	1	0	0	0	0	0	0	0	0	0	0
LDLRAD3	PRR5L	1	11	36120011	11	36422547	1	4	1	1	1	0	0	0	0	0	0	0	0	0
CASD1	GNG11	1	7	94183887	7	93555403	1	2	2	1	1	1	1	1	1	0	0	0	0	0
RP11-85K15.2	BAZ1A	1	14	35390795	14	35343868	1	3	1	1	0	0	0	0	0	0	0	0	0	0
TBC1D16	AC012354.6	1	17	77983959	2	45193557	2	21	17	1	1	1	1	0	1	1	0	0	0	0
FOSL2	BRE	1	2	28616689	2	28460069	2	31	16	1	1	1	0	0	1	1	1	0	0	0
MANBA	UBE2D3	1	4	103681875	4	103731012	2	23	8	1	1	0	1	0	1	0	0	0	0	0
SMDT1	NDUFA6-AS1	1	22	42475958	22	42520052	2	12	7	1	0	0	0	0	0	0	0	0	0	0
AC026150.8	GOLGA8H	0	15	30838172	15	30898046	2	10	2	1	0	0	0	0	0	0	0	0	0	0
RP11-680G10.1	GSE1	1	16	85391249	16	85667520	2	7	4	1	1	0	1	0	0	0	0	0	0	0
LINC00472	RP11-154D6.1	0	6	72126113	6	71943360	2	4	6	1	1	0	0	0	0	0	0	0	0	0
CNPY3	GNMT	1	6	42903408	6	42929950	2	5	4	1	1	0	0	0	0	0	0	0	0	0
CNPY3	RP3-475N16.1	1	6	42905945	6	42911536	2	4	4	1	1	0	0	0	0	0	0	0	0	0
GNA12	CARD11	1	7	2883487	7	2998265	2	4	3	1	0	0	0	0	0	0	0	0	0	0
RBM14	C11orf80	1	11	66384528	11	66526514	2	5	2	1	1	0	0	1	0	0	0	0	0	0
FARS2	RP3-380B8.4	1	6	5613553	6	5852296	2	1	4	0	1	0	1	0	0	0	0	0	0	0
FSD1L	SLC44A1	1	9	108234286	9	108200562	2	4	1	1	0	0	0	0	0	0	0	0	0	0
SIK1	CBS	1	21	44841518	21	44473757	2	1	3	0	1	0	0	1	0	0	0	0	0	0
RPS15A	RPLP1	0	16	18794278	15	69745158	3	2	19	0	1	0	0	0	0	0	0	0	0	0
AC021224.1	HNRNPA1	0	18	29993199	12	54680737	3	7	4	0	0	1	0	0	0	0	0	0	0	0
PALLD	TSC22D1	1	4	169589519	13	45009019	3	5	4	1	1	1	1	1	1	1	0	0	0	0
PKD1P5	DOT1L	1	16	18483571	19	2229784	3	1	6	1	0	0	0	1	0	0	0	0	0	0
EIF4A2	PRPF40A	1	3	186505373	2	153551136	3	2	4	0	1	1	1	0	1	0	0	0	0	0
DHX36	MATN1-AS1	1	3	153994536	1	31199090	3	3	3	1	1	1	1	1	1	0	0	0	0	0
TAF15	HNRNPA2B1	0	17	34171732	7	26233314	3	3	3	1	0	0	0	0	0	0	0	0	0	0
POLR2J3	TRO	1	7	102207444	X	54954100	3	1	4	1	0	0	0	0	0	0	0	0	0	0
TRMT10B	ASNS	1	9	37762114	7	97481780	3	2	3	1	0	0	0	0	1	0	0	0	0	0
FBXL8	PCBP1-AS1	1	16	67195840	2	70278437	3	3	2	1	1	1	1	1	1	0	0	0	0	0
NABP1	INTS10	1	2	192543854	8	19694563	3	3	2	1	1	1	1	0	1	1	0	0	0	0
PRKAR1A	H3F3A	0	17	66522053	1	226259052	3	3	2	1	0	0	0	0	0	0	0	0	0	0
MBNL2	ENAH	1	13	97874785	1	225755116	3	4	1	1	0	0	0	0	0	0	0	0	0	0
FOSL2	TOMM70A	1	2	28616689	3	100091566	3	1	3	1	0	1	1	1	0	0	0	0	0	0
TPT1-AS1	FRYL	1	13	45944317	4	48517292	3	1	3	0	0	1	0	0	1	0	0	0	0	0
HNRNPR	KPNA2	1	1	23660011	17	66039021	3	2	2	1	0	0	1	0	0	0	0	0	0	0
LZIC	RAC1	1	1	9996577	7	6431555	3	2	2	0	1	0	0	0	0	0	0	0	0	0
PCNXL2	ODC1	1	1	233398704	2	10580994	3	2	2	1	1	1	0	0	0	0	0	0	0	0
RP11-193F5.4	HMGN2	1	14	61438990	1	26798997	3	2	2	0	1	0	0	0	0	0	0	0	0	0
RPL4	PFDN5	1	15	66795396	12	53691634	3	2	2	1	1	0	1	0	0	0	0	0	0	0
BCL2L2-PABPN1	RPL30	1	14	23793498	8	99054078	3	3	1	1	0	0	0	0	0	0	0	0	0	0
DAP3	CMC4	1	1	155686919	X	154292308	3	3	1	1	1	1	0	0	0	0	0	0	0	0
PPHLN1	NCK1	0	12	42749024	3	136667101	3	3	1	1	0	1	1	0	1	0	0	0	0	0
ANP32B	PTMS	1	9	100773671	12	6879558	3	1	2	1	0	1	0	0	0	0	0	0	0	0
ATP2A2	RBM39	1	12	110734542	20	34330035	3	1	2	0	0	1	0	0	0	0	0	0	0	0
BCL2L11	LCMT1	1	2	111878765	16	25175919	3	1	2	1	0	0	0	0	0	0	0	0	0	0
CLCN6	CRNDE	1	1	11867247	16	54959125	3	1	2	0	0	1	1	1	1	0	0	0	0	0
CPSF6	SKP2	1	12	69656342	5	36183942	3	1	2	0	0	1	0	0	0	0	0	0	0	0
NKTR	MED23	1	3	42674315	6	131943119	3	1	2	0	0	1	0	0	0	0	0	0	0	0
RNGTT	ZC3H13	1	6	89559474	13	46544600	3	1	2	0	0	1	0	0	0	0	0	0	0	0
SOS2	PEX11A	1	14	50647290	15	90229777	3	1	2	0	0	1	0	1	0	0	0	0	0	0
UQCRC2	RPL37	1	16	21987564	5	40828053	3	1	2	0	0	1	0	0	0	0	0	0	0	0
ALG13	SNRPA1	0	X	110925522	15	101827215	3	2	1	1	0	0	0	1	0	0	0	0	0	0
ANP32A	EEF1B2	0	15	69075295	2	207026762	3	2	1	0	1	0	0	0	0	0	0	0	0	0
CTSA	TIAL1	1	20	44525679	10	121336262	3	2	1	1	1	1	0	0	0	0	0	0	0	0
DHRS1	AURKA	0	14	24759809	20	54967352	3	2	1	1	0	0	0	0	0	0	0	0	0	0
DUSP16	ANAPC11	1	12	12653453	17	79851428	3	2	1	1	0	0	0	1	0	0	0	0	0	0
EXOSC2	UBL5	1	9	133574781	19	9939268	3	2	1	1	0	0	0	0	0	0	0	0	0	0
HIST1H2AC	RP11-200A1.1	1	6	26124977	3	134039762	3	2	1	1	0	0	0	0	0	0	0	0	0	0
IARS	TOX4	1	9	95050408	14	21960455	3	2	1	1	1	0	0	0	0	0	0	0	0	0
LEMD1	RPL30	1	1	205389583	8	99054078	3	2	1	1	0	1	0	0	0	0	0	0	0	0
MAPK9	OGFOD3	1	5	179675973	17	80364358	3	2	1	1	0	0	0	0	0	0	0	0	0	0
NUTF2	PATL1	0	16	67899132	11	59405884	3	2	1	1	1	1	0	0	0	0	0	0	0	0
PCBD2	NOL10	1	5	134246156	2	10747437	3	2	1	1	1	1	0	0	0	0	0	0	0	0
PCMTD1	POM121C	1	8	52758221	7	75070925	3	2	1	1	1	0	0	0	0	0	0	0	0	0
PNISR	KLHDC1	1	6	99860427	14	50175877	3	2	1	1	1	0	0	1	0	0	0	0	0	0
RAB10	MXI1	1	2	26257604	10	111987947	3	2	1	1	0	0	0	0	0	0	0	0	0	0
SIRPA	VPRBP	1	20	1896101	3	51436258	3	2	1	1	0	1	0	1	0	0	0	0	0	0
SNHG8	PDS5B	0	4	119200292	13	33268360	3	2	1	1	0	0	0	0	0	0	0	0	0	0
TJAP1	PLOD3	1	6	43471444	7	100850185	3	2	1	1	1	1	0	0	0	0	0	0	0	0
TOP2A	GLRX5	1	17	38556124	14	96010284	3	2	1	1	0	0	0	0	0	0	0	0	0	0
ZFR	ZMYM5	1	5	32400112	13	20413125	3	2	1	1	0	0	0	1	0	0	0	0	0	0
COMMD1	RP11-390P2.4	1	2	62363114	6	139017734	3	1	1	0	0	1	0	0	0	0	0	0	0	0
DDX46	RSBN1L-AS1	0	5	134121276	7	77313568	3	1	1	0	0	1	0	0	0	0	0	0	0	0
FNDC3B	RBM39	1	3	171851336	20	34301018	3	1	1	0	0	1	0	0	0	0	0	0	0	0
INVS	TPST1	0	9	103035358	7	65821812	3	1	1	0	0	1	0	0	0	0	0	0	0	0
IQGAP1	RPL30	1	15	90934105	8	99057627	3	1	1	0	0	1	0	0	0	0	0	0	0	0
NAA15	PLK1	1	4	140270735	16	23700559	3	1	1	0	0	1	0	0	0	0	0	0	0	0
NEK7	CMC2	1	1	198233365	16	81010076	3	1	1	0	0	1	0	0	0	0	0	0	0	0
RBM14-RBM4	INTS10	0	11	66407594	8	19709160	3	1	1	0	0	1	0	0	0	0	0	0	0	0
RNF145	PLOD2	1	5	158621724	3	145842016	3	1	1	0	0	1	0	0	0	0	0	0	0	0
TOX2	POLR1D	1	20	42683166	13	28222516	3	1	1	0	0	1	0	1	0	0	0	0	0	0
ZNF521	RAB28	1	18	22775124	4	13383218	3	1	1	0	0	1	0	0	0	0	0	0	0	0
ZSCAN31	AGTPBP1	0	6	28321639	9	88236200	3	1	1	0	0	1	0	0	0	0	0	0	0	0
AGPAT5	CTD-2541M15.1	1	8	6566408	8	6527761	3	19	4	1	0	0	0	0	0	0	0	0	0	0
BOLA2B	RP11-347C12.2	0	16	30204679	16	30300106	3	18	2	1	0	0	1	0	0	0	0	0	0	0
CPSF4	MYH16	0	7	99054994	7	98836534	3	19	1	0	1	0	0	0	0	0	0	0	0	0
LINC00623	SEC22B	0	1	144339564	1	145109524	3	3	8	1	0	0	0	0	0	0	0	0	0	0
CAB39	SP100	0	2	231577945	2	231359131	3	9	2	0	0	1	0	0	0	0	0	0	0	0
ERO1A	FERMT2	1	14	53138348	14	53348187	3	5	4	1	1	0	1	0	1	0	0	0	0	0
CD109	EEF1A1	1	6	74481304	6	74229239	3	4	4	1	0	0	0	0	0	0	0	0	0	0
SUCO	TBX19	1	1	172502637	1	168260398	3	4	4	1	0	1	1	1	1	0	0	1	0	0
ZC3H8	SUCLG1	1	2	113007768	2	84652727	3	1	6	0	0	1	1	0	1	0	0	0	0	0
ZNF37BP	C10orf25	1	10	43046005	10	45495864	3	2	5	1	1	1	1	1	0	0	0	0	0	0
SLC30A9	OCIAD1	1	4	42003797	4	48850416	3	3	4	1	1	1	1	0	1	0	1	0	0	0
ADK	VCL	1	10	75984349	10	75830428	3	6	1	1	0	0	0	0	0	0	0	0	0	0
AC009403.2	POMZP3	1	7	155436162	7	76247617	3	2	4	1	0	0	1	0	0	0	0	0	0	0
RP11-282O18.3	CDK2AP1	1	12	123744821	12	123746350	3	2	4	1	1	0	0	0	0	0	0	0	0	0
CAV1	TES	1	7	116166743	7	115897348	3	3	3	1	1	1	1	0	0	0	0	0	0	0
CLIP4	FAM179A	1	2	29356682	2	29217591	3	2	3	1	0	0	0	0	0	0	0	0	0	0
MMADHC	EPC2	1	2	150438641	2	149528361	3	2	3	1	1	0	1	0	1	0	0	0	0	0
POM121	VKORC1L1	1	7	72361649	7	65413658	3	2	3	1	0	0	0	0	0	0	0	0	0	0
RP11-123O10.4	GRIP1	1	12	67462830	12	66990707	3	2	3	1	1	0	0	0	0	0	0	0	0	0
RPF1	PRKACB	1	1	84948678	1	84700863	3	2	3	1	1	0	1	0	1	0	0	0	0	0
ST3GAL1	SLA	1	8	134558017	8	134100084	3	2	3	0	1	0	0	0	0	0	0	0	0	0
CCDC122	ENOX1	1	13	44448978	13	44241680	3	3	2	0	1	0	0	0	0	0	0	0	0	0
EIF4H	GPNMB	1	7	73602128	7	23299599	3	3	2	1	1	0	1	1	0	0	0	0	0	0
ACACA	AATF	0	17	35536201	17	35376304	3	2	2	1	0	0	0	0	0	0	0	0	0	0
CTBP2	BUB3	1	10	126799559	10	124919923	3	2	2	1	1	0	0	0	0	0	1	0	0	0
ARSJ	MTHFD2L	1	4	114899593	4	75040223	3	3	1	1	0	0	1	1	0	0	0	0	0	0
ATP6V0E1	ERGIC1	0	5	172410967	5	172359439	3	3	1	1	0	0	0	0	0	0	0	0	0	0
ITGB6	RBMS1	0	2	160998493	2	161143595	3	3	1	1	0	0	0	0	0	0	0	0	0	0
ST7	TES	1	7	116593745	7	115874588	3	3	1	1	1	1	1	0	1	0	1	0	0	0
TOP2B	NGLY1	1	3	25665788	3	25761126	3	3	1	1	0	0	0	0	0	0	0	0	0	0
ZNF519	RAB31	1	18	14124349	18	9859225	3	3	1	1	0	0	1	0	0	0	0	0	0	0
BRD1	RP6-109B7.4	1	22	50187682	22	46463751	3	1	2	0	0	1	0	0	0	0	0	0	0	0
CLN6	AAGAB	0	15	68510874	15	67495236	3	1	2	0	0	1	0	0	0	0	0	0	0	0
PAK6	BUB1B	0	15	40532882	15	40457254	3	1	2	1	0	0	0	0	0	0	0	0	0	0
SLC39A11	NSF	1	17	71080947	17	44714742	3	1	2	1	0	0	0	1	0	0	0	0	0	0
ZHX1	MRPL13	1	8	124286362	8	121408364	3	1	2	0	0	1	0	0	0	0	0	0	0	0
ANXA2	NARG2	1	15	60674541	15	60715961	3	2	1	1	0	0	0	0	0	0	0	0	0	0
DNTTIP2	GCLM	1	1	94344633	1	94360284	3	2	1	1	1	0	0	0	0	0	0	0	0	0
FAM208A	PSMD6	1	3	56672734	3	63999283	3	2	1	0	0	1	0	0	0	0	0	0	0	0
GGCT	GARS	1	7	30544185	7	30665850	3	2	1	1	0	0	0	0	0	0	0	0	0	0
GNAO1	RP11-463O9.5	1	16	56370772	16	86598924	3	2	1	1	0	1	1	0	0	0	0	0	0	0
HIF1A	PRKCH	0	14	62162557	14	61857943	3	2	1	1	0	0	0	0	0	0	0	0	0	0
LUZP1	SRRM1	0	1	23435515	1	24975350	3	2	1	1	0	0	0	1	0	0	0	0	0	0
NOP56	SNRPB	1	20	2637541	20	2443407	3	2	1	1	0	0	0	0	0	0	0	0	0	0
TBC1D9B	RNF130	1	5	179315103	5	179390564	3	2	1	0	1	0	0	0	0	0	0	0	0	0
AHI1	PSMB1	1	6	135748305	6	170858201	3	1	1	0	0	1	0	0	0	0	0	0	0	0
SLC39A8	PAPSS1	0	4	103225474	4	108615162	3	1	1	0	0	1	0	0	0	0	0	0	0	0
DLX5	NHLRC3	1	7	96653581	13	39613273	3	1	5	0	0	0	1	1	1	0	0	0	0	0
RGS5	MTHFD1L	1	1	163276023	6	151413603	3	1	5	0	0	0	1	0	1	0	0	1	0	0
KDM2A	ZNF532	1	11	66999431	18	56601665	3	1	4	0	0	0	0	1	0	0	0	0	0	0
DPP9	ENDOG	1	19	4714093	9	131583018	3	1	3	0	0	0	0	1	0	0	0	0	0	0
TRIM52	NUP133	1	5	180687002	1	229634053	3	1	3	0	0	0	0	1	0	0	0	0	0	0
AFG3L2	RNPC3	1	18	12351305	1	104097656	3	1	2	0	0	0	0	1	0	0	0	0	0	0
TNFRSF1A	PTMS	1	12	6450942	12	6878769	3	1	2	0	0	0	0	1	0	0	0	0	0	0
BCL11B	PPP2R5C	1	14	99723808	14	102323023	3	1	1	0	0	0	0	1	0	0	0	0	0	0
GBE1	RYBP	1	3	81810526	3	72428578	3	1	1	0	0	0	0	1	0	0	0	0	0	0
MED15	FTH1	0	22	20905723	11	61735103	NA	4	217	0	0	0	1	0	0	0	0	0	0	0
BTF3	ENSG00000219298	0	5	72794272	6	150299052	NA	34	28	0	0	0	0	0	0	1	0	0	0	0
RP11-33B1.1	SEPT7P2	0	4	120382872	7	45798673	NA	4	57	0	0	0	1	0	0	0	0	0	0	0
LGALS1	PPP2CA	0	22	38075813	5	133561245	NA	2	50	0	0	0	0	0	0	0	1	0	0	0
RPS10	RP11-464D20.2	0	6	34393809	17	60594128	NA	18	25	0	0	0	1	0	0	0	0	0	0	0
AP006222.2	FAM157C	0	1	238567	16	90203008	NA	12	14	0	0	0	1	0	0	0	0	0	0	0
STK17A	YTHDC1	0	7	43664117	4	69197821	NA	15	9	0	0	0	1	0	0	0	0	0	0	0
RP11-384K6.6	LINC00265	0	4	119549191	7	39822398	NA	9	11	0	0	0	1	0	0	0	0	0	0	0
NSUN2	PRSS23	0	5	6599353	11	86518673	NA	2	16	0	0	0	0	0	0	0	1	0	0	0
AC137934.1	AC002055.4	0	16	90288794	22	51223721	NA	7	11	0	0	0	1	1	0	0	0	0	0	0
APP	RPL10	0	21	27423509	X	153626718	NA	9	9	0	0	0	1	0	0	0	0	0	0	0
SNHG7	AC074183.4	0	9	139619507	7	84568948	NA	10	6	0	0	0	1	0	0	0	0	0	0	0
ACLY	UBA1	0	17	40034356	X	47073726	NA	13	2	0	0	0	0	0	0	0	1	0	0	0
EVA1C	FAM86B3P	0	21	33805459	8	8099484	NA	6	6	0	0	0	1	0	0	0	0	0	0	0
RP11-87H9.2	FRG1B	0	9	69082110	20	29614327	NA	6	6	0	0	0	1	0	0	0	0	0	0	0
RP11-34P13.7	AC093642.5	0	1	129055	2	243080935	NA	4	7	0	0	0	1	0	0	0	0	0	0	0
XX-C2158C6.2	AC093642.5	0	6	171054606	2	243081039	NA	4	7	0	0	0	1	0	0	0	0	0	0	0
RP11-14N7.2	AC027612.6	0	1	148933291	2	91843394	NA	5	4	0	0	0	1	0	0	0	0	0	0	0
WASH3P	ABC7-42389800N19.1	0	15	102513423	12	87703	NA	5	4	0	0	0	1	0	0	0	0	0	0	0
WASH3P	XXyac-YRM2039.2	0	15	102513795	9	17719	NA	5	4	0	0	0	1	0	0	0	0	0	0	0
WASH6P	ABC7-42389800N19.1	0	X	155252677	12	88017	NA	7	2	0	0	0	1	0	0	0	0	0	0	0
MTERFD2	RP11-597A11.1	0	2	242033847	14	20128737	NA	4	4	0	0	0	1	0	0	0	0	0	0	0
RPS10	RP11-425L10.1	0	6	34393809	11	46450700	NA	5	2	0	0	0	1	0	0	0	0	0	0	0
RP11-592N21.1	RPL17	0	15	71634012	18	47017815	NA	4	2	0	0	0	1	0	0	0	0	0	0	0
RPS29	RP11-156G14.6	0	14	50053094	9	35592783	NA	4	2	0	0	0	1	0	0	0	0	0	0	0
ZCCHC7	RCC1	0	9	37305541	1	28835417	NA	4	2	0	0	0	1	0	0	0	1	0	0	0
NCOA7	CTA-293F17.1	1	6	126107359	7	20368479	NA	3	2	0	0	0	0	0	1	0	0	0	0	0
TRAF2	ITPR1	1	9	139811067	3	4878458	NA	3	2	0	0	0	0	0	0	0	1	0	0	0
RTFDC1	RP4-799D16.1	1	20	55052180	1	25370327	NA	4	1	0	0	0	1	0	0	0	0	0	0	0
PELP1	DNAJC2	0	17	4575409	7	102963078	NA	1	3	0	0	0	0	1	0	0	0	0	0	0
PTP4A2	TNFRSF21	0	1	32372022	6	47200730	NA	2	2	0	0	0	0	0	0	0	1	0	0	0
PSMA7	MLF1	0	20	60711791	3	158317803	NA	2	1	0	0	0	0	1	0	0	0	0	0	0
STRC	E2F4	0	15	43910857	16	67229685	NA	2	1	0	0	0	0	1	0	0	0	0	0	0
ACTR6	DHDDS	1	12	100594697	1	26759382	NA	1	1	0	0	0	0	1	0	0	0	0	0	0
ERBB2IP	KTN1	1	5	65222634	14	56078737	NA	1	1	0	0	0	0	1	0	0	0	0	0	0
MTHFD1L	RPL32	0	6	151413722	3	12881839	NA	1	1	0	0	0	0	1	0	0	0	0	0	0
RPS10	RP3-375P9.2	0	6	34393809	6	34711953	NA	8	167	0	0	0	1	0	0	0	0	0	0	0
U91319.1	SHISA9	0	16	13444037	16	13297406	NA	6	82	0	0	0	1	0	0	0	0	0	0	0
PKD1P1	RP11-1212A22.1	0	16	16434163	16	18428708	NA	5	45	0	0	0	1	0	0	0	0	0	0	0
PKD1P1	RP11-958N24.1	0	16	16434163	16	15029254	NA	5	45	0	0	0	1	0	0	0	0	0	0	0
CTD-2334D19.1	PRR16	0	5	120125649	5	119800340	NA	15	16	0	0	0	1	0	0	0	0	0	0	0
PPP1R10	ABCF1	0	6	30573812	6	30539337	NA	8	17	0	0	0	1	0	0	0	0	0	0	0
BUD31	ATP5J2-PTCD1	0	7	99017239	7	99026827	NA	12	9	0	0	0	0	0	0	0	1	0	0	0
PDXDC2P	PKD1P1	0	16	70016253	16	18455134	NA	8	12	0	0	0	1	0	0	0	0	0	0	0
TAS2R14	PRH2	0	12	11126254	12	11083261	NA	18	2	0	0	0	0	0	1	0	0	0	0	0
RP11-467L19.8	HERC2	0	15	20724201	15	28501235	NA	8	10	0	0	0	1	0	0	0	0	0	0	0
AC022596.6	KRT14	0	17	16721553	17	39739392	NA	5	12	0	0	0	1	0	0	0	0	0	0	0
PKD1P1	NPIPP1	0	16	16434163	16	15219548	NA	6	8	0	0	0	1	0	0	0	0	0	0	0
CAST	CTD-2337A12.1	0	5	96011243	5	95715356	NA	7	7	0	0	0	1	0	0	0	0	0	0	0
BMS1	MBL1P	0	10	43279810	10	81664805	NA	9	4	0	0	0	1	0	0	0	0	0	0	0
MATN2	RPL30	0	8	99048442	8	99057316	NA	10	3	0	0	0	0	0	0	0	1	0	0	0
AGAP6	TIMM23B	0	10	51749068	10	51387763	NA	11	1	0	0	0	1	0	0	0	0	0	0	0
AC159540.1	LINC00342	0	2	98088770	2	96473050	NA	4	7	0	0	0	1	0	0	0	0	0	0	0
POMZP3	ZP3	0	7	76241039	7	76069756	NA	4	7	0	0	0	1	0	0	0	0	0	0	0
RP11-307E17.8	HIATL2	0	9	97101118	9	99711837	NA	4	7	0	0	0	1	1	0	0	0	0	0	0
PKD1P5	NPIPP1	0	16	18462115	16	15204678	NA	8	3	0	0	0	1	0	0	0	0	0	0	0
BIRC6	LTBP1	0	2	32631567	2	33246273	NA	5	5	0	0	0	1	1	0	0	0	0	0	0
RP11-927P21.1	ARL17B	0	17	62897188	17	44376892	NA	5	5	0	0	0	1	0	0	0	0	0	0	0
POLR2J4	PMS2P5	0	7	44053192	7	74366193	NA	6	3	0	0	0	1	0	0	0	0	0	0	0
RP11-592B15.4	PARG	0	10	51314980	10	51087876	NA	6	3	0	0	0	1	0	0	0	0	0	0	0
RGPD3	RANBP2	0	2	107042450	2	109379693	NA	7	2	0	0	0	1	0	0	0	0	0	0	0
CHCHD3	EXOC4	0	7	132659929	7	132990631	NA	1	7	0	0	0	1	0	0	0	0	0	0	0
RP11-798G7.6	ARL17B	0	17	43635773	17	44376892	NA	4	4	0	0	0	1	0	0	0	0	0	0	0
WDR41	KRTCAP2	0	5	76758920	1	155145104	NA	4	3	0	0	0	1	0	0	0	0	0	0	0
AC012309.5	LINC00665	0	19	37748296	19	36804224	NA	5	3	0	0	0	1	0	0	0	0	0	0	0
DTX2P1	PMS2P1	0	7	76648314	7	99918707	NA	4	3	0	0	0	1	0	0	0	0	0	0	0
EMR2	CD97	0	19	14885068	19	14499514	NA	5	2	0	0	0	1	0	0	0	0	0	0	0
PKD1	NPIPP1	0	16	2150167	16	15221754	NA	5	2	0	0	0	1	0	0	0	0	0	0	0
RP11-250B2.3	BCKDHB	0	6	81162874	6	80982938	NA	4	2	0	0	0	1	0	0	0	0	0	0	0
PDPR	RP11-252A24.2	0	16	70154364	16	74401963	NA	4	1	0	0	0	1	0	0	0	0	0	0	0
PMS2P1	RP11-313P13.3	0	7	99927805	7	72511686	NA	4	1	0	0	0	1	0	0	0	0	0	0	0
RP11-798G7.6	ARL17A	0	17	43623171	17	44634731	NA	4	1	0	0	0	1	0	0	0	0	0	0	0
NKTR	GCLM	0	3	42674315	1	94360284	NA	1	3	0	0	0	1	0	0	0	0	0	0	0
PARG	AGAP5	0	10	51065352	10	75473089	NA	1	3	0	0	0	0	1	0	0	0	0	0	0
FBXO32	ANXA13	1	8	124525438	8	124724993	NA	2	2	0	0	0	0	0	0	0	1	0	0	0
ZNF418	U2AF1L4	0	19	58445185	19	36234245	NA	1	2	0	0	0	0	1	0	0	0	0	0	0
NUP62	ATF5	0	19	50432580	19	50433988	NA	2	1	0	0	0	0	0	0	1	0	0	0	0
PARG	TIMM23	0	10	51065352	10	51732772	NA	2	1	0	0	0	0	1	0	0	0	0	0	0
PPP3CA	FAM13A	0	4	102267896	4	89950799	NA	2	1	0	0	0	0	1	0	0	0	0	0	0
RASA4	POLR2J4	0	7	102136916	7	43985922	NA	1	1	0	0	0	0	1	0	0	0	0	0	0
