# Supplementary material for: INTEGRATE: gene fusion discovery using whole genome and transcriptome data
Source: HighWire-hosted journal article supplement (doi:10.1101/gr.186114.114), 2015-11-10
Supplement: Supplemental_Table2.xlsx [file Supplemental_Table2.xlsx]

## Sheet: Sheet1
Supplementary Table 2. Validated fusion junctions in HCC1395 cell line.
Note: Coordinates are based on Genome Reference Consortium Human Build 37 (GRCh37).
5p_gene	3p_gene	5p_strand	3p_strand	5p_chr	5p_fusion_junction	3p_chr	3p_fusion_junction	junction_sequence(30bp at each gene)
EIF3K	CYP39A1	+	-	19	39123318	6	46607405	TGCTGGCCGAGATGCTCGGGGATCTGTCGGCATCAATTCCAAAGAATGTCTTTTTAGCAC
MDH1	RP11-357C3.3	+	-	2	63826426	X	62619783	CGTTTGGATCACAACCGAGCTAAAGCTCAAATGATGTCAGAAGTGGGATCCAAAGTAGAG
LMF1	FOXK2	-	+	16	1020788	17	80559179	TGCTCCTGAAGGCCCTAGCCTTCGTGTACTCCGCGGCGAGTCCTTTGCACATGTTGGCAA
GS1-124K5.2	RP11-147C23.1	-	+	7	65915058	1	96471749	GTACGTCTTCCAGGGTCGGATCAAAGAAGGCAAGGTAAGTCCAGGTCCTTACCTCCACCT
RNGTT	RPF1	-	+	6	89559474	1	84946639	TATTTGATATATGACATAATTAAATTCAATGAAAAGTTGGCAGCTAAGAAAAAACTTAAA
RP11-83A24.2	KCNQ5	-	+	4	140374839	6	73900296	TTGACGGGGGCGTGTACCTGGAGAGCAACGAATTATGAAATTTCATGTTGCAAAACGGAA
PLA2R1	RBMS1	-	-	2	160832579	2	161159998	CAAGAATTCATCCACAGCAAAATAAAAGCGCAACAGGAACAAGATCCTACCAACCTCTAC
RAB7A	LRCH3	+	+	3	128445202	3	197592294	CGGCCCGGAGCCCCCAGCGCAGCGGCCGCGAGTGATGACAGACCTAATGCTCTATTAAGT
SHISA5	RP11-24C3.2	-	-	3	48520586	3	48482272	TCGCCCTGGCTACAACGACCCCATGTCAGGCTCTTCCTAAGGAATGGAAGCCCAGACTGC
UNC5C	STPG2	-	-	4	96199410	4	98162249	CGACCACCTGAAGGGATCCCAGTGGCTGAGGTTGAGGTCCAGTTACTGCAACATCAGTAT
TMEM104	RAB37	+	+	17	72791771	17	72725395	CGCCGAGTGGACGCCTACCGCATCTACTTGACCATCCTGGTGGGTGACAGTGGTGTGGGA
MAVS	PANK2	+	+	20	3843060	20	3888573	ACACAGAACTGGGCAGTACCCACACAGCAGTTTTTCCATGGTTTGGACTGGATATCGGTG
ZNF37BP	CEP164P1	-	-	10	43046005	10	45561970	CAACACTAGTGGAATATGATCACATCCCAGCTGCTAAGAAGACCGCAGCAGCCTTCATAA
POU2F1	NME7	+	-	1	167382351	1	169102055	TGAGCAACAGTACACTGGCAACTATTCAAGGTTCAATACTTCTTCAAGATCTTGGATAAT
NRL	DHRS4-AS1	-	-	14	24583931	14	24410367	AACTGGACAGCGGAGCACGATGATTGATAGGTGCCACTTCGGATAAACCCTTTGGACTCC
KPNA1	EEFSEC	-	+	3	122168421	3	127965679	AGTATGTAGGAGACTTGTGGAACTGCTGATGGGCCCAGATCATTGATCTGATGATGCTGG
NOM1	MNX1-AS2	+	+	7	156756720	7	156799571	TTTTTTGGATGCTTTTGAAAAGCTTCTGAAGAGACGTCTGAGTGTCCCTGTTAAACAGGG
EFTUD2	KIF18B	-	-	17	42942298	17	43006392	TCTGCAAAAAGTTCTTTGGCGAGTTCACAGGTTGGCCCTAAAGGTGCTGTGCGTTGCCCA
OSBPL9	RP11-191G24.1	+	+	1	52179751	1	52026554	ACAATTCTTCGACATACTCTCCAGCTTCAAAAGCACCTCCAAGGATCACGTAGGACCAGC
MFSD3	MROH1	+	+	8	145736286	8	145254025	TGCAGCCAGCTGGCCCCCAGGGCCCTGCAGATCTGTGTGCCTGTGGAGTCCTCAAGCCCC
WARS	DEGS2	-	-	14	100826891	14	100616047	CCTGCGCAGAGGCATCTTCTTCTCACACAGCCAAGTACCCGGCCATCAAGGCCCTGATGC
HNRNPUL2	AHNAK	-	-	11	62484461	11	62201363	GGCAGAACCGAAGCCGGGGCCAAGGCTATGGACTGTAGAAGCGGCCAGGAAGAAAACCAC
CCDC117	CTA-292E10.6	+	+	22	29179633	22	29217960	AGTTTTTACAAAGAAAATGATTGAGTCTATTGTGCCTTCAGCCAAAAGCAGAACTGGAAA
LDLRAD3	PRR5L	+	+	11	36120011	11	36422547	GTGATGAGGAAAGCTGTGAAAGTTCTCAAGGTGTTGGCTACGTTTGTGGTTTTAAGAAAG
CASD1	GNG11	+	+	7	94183887	7	93555403	TTTGCTTGGTTTGGAAAAATTTCATTAGAGGTGTCTAAATGTTCTGAAGAAATAAAGAAC
RP11-85K15.2	BAZ1A	-	-	14	35390795	14	35343868	AAAAACATTAAAATTCTCCAACTGAACAAGGGAAGCGGGGCCGGCGCGGGCGGCCGAGGG
TBC1D16	AC012354.6	-	+	17	77983959	2	45193557	CGGCTCCGTGTTTCTGGAAAGTGACAGCAGACAAGGCCACCTACATCCCAAGCCAGCTGG
FOSL2	BRE	+	+	2	28616689	2	28460069	TCCTACTCCAGCGGCGGCGGCGGCCAGCAGTGCACTTGGAGGCTCCTCAGCTCTTCATAT
MANBA	UBE2D3	-	-	4	103681875	4	103731012	AGCGCCTTGTTCCAGCAGGGCCTGATCCAGGAACTTAGTGATTTGGCCCGTGACCCTCCA
SMDT1	NDUFA6-AS1	+	+	22	42475958	22	42520052	AGCGGCGCCATTTTGCCCAAACCGGTGAAAGTCACGACCCCCAGGAGACCTGGAGGACTG
RP11-680G10.1	GSE1	+	+	16	85391249	16	85667520	AGGAGGACGGACCAGACCTTACTGGTGCAGGCATGAGCCATGAGCCCAAGTCCCCTTCGC
CNPY3	GNMT	+	+	6	42903408	6	42929950	GAGAGGACCGGCAGCAATCGATTTGCCAAGGGTGGACTCCATTATGCTGGTGGAAGAGGG
CNPY3	RP3-475N16.1	+	+	6	42905945	6	42911536	CCAACCACGTGCTGAAGGGAAAAGACACCAAAACACAAACAGCAGAATGGCTCCATCTCT
GNA12	CARD11	-	-	7	2883487	7	2998265	CGCGACACCATCTTCGACAACATCCTCAAGATCCCAAGCACTGCAAGTCCAGATGCAACG
RBM14	C11orf80	+	+	11	66384528	11	66526514	GACGCGTCATCGAGTGTGACGTGGTGAAAGTTGCTTCTGCAGGAAGCCTTTTTGGTGGCA
FARS2	RP3-380B8.4	+	+	6	5613553	6	5852296	TGATCTCATAGACAAGTTTGTACATCCAAAGTCCCTTCCTCTCTCCAGCTGTCTGGAATG
FSD1L	SLC44A1	+	+	9	108234286	9	108200562	GATATAAAGGAACCTGAAGAATTTTCAAAGCTGAAGAAAAGGTGACTGGTCTCATGAGCC
SIK1	CBS	-	-	21	44841518	21	44473757	TGGATGGCAACATGGACATCAAGCTGGCAGGATGTTTCACCAAGGAAATATTGAGAGAGA
PALLD	TSC22D1	+	-	4	169589519	13	45009019	ACACAACATCTGCTGAGGTGTTCATTGAAGGATCTAGTGAAAAGCCATTTGATGTATGCG
PKD1P5	DOT1L	-	+	16	18483571	19	2229784	TATCAGAGCGCGGCGGTCTTCAAGCTCTCAGTAACTAGGATTTCTACCTCAACCGCGAGA
EIF4A2	PRPF40A	+	-	3	186505373	2	153551136	AGTCGTGTTCTGATCACTACTGACTTGTTGATGCCTGGAATGATGTCGTCAGTAATGCCT
DHX36	MATN1-AS1	-	+	3	153994536	1	31199090	TCTCCAGCAAGAATTGCCCATCTTGTTAAGGACTCAAAATTGAGAACAGTGTGTCCGGTA
POLR2J3	TRO	-	+	7	102207444	X	54954100	AGCCACGCTTCCTGTACAGCCTGCAGAACTGTACCTGGAGTACAAGAGGGTCCCTAACAG
TRMT10B	ASNS	+	-	9	37762114	7	97481780	CTGGCCACAGGCAGTACGGCATGGTGCTCGGTTGATGATGCAATGATGGCAAATGCAGCC
FBXL8	PCBP1-AS1	+	-	16	67195840	2	70278437	CAGCGCCGTGTGGCACGACACAAAAATCAGGTGAGACGTGGTCTTGTAACACAGTGGTTA
NABP1	INTS10	+	+	2	192543854	8	19694563	GCCAGGGGATATTATTCGGTTGACCAGAGGATGACATGTGAAAAAGTCCTTGATTTGATG
MBNL2	ENAH	+	-	13	97874785	1	225755116	AAATGGGAAGGACAGGCAGAGCTAAACAAGTGAACAGAGTATCTGTCAGGCAAGAGCTGC
FOSL2	TOMM70A	+	-	2	28616689	3	100091566	TCCTACTCCAGCGGCGGCGGCGGCCAGCAGTACCGCCAGGCATATACGGGAAACAACTCT
TPT1-AS1	FRYL	+	-	13	45944317	4	48517292	TGTTTTCCTTCAGAGCACTGGCCTCCAATTGATACAACTTCAGTATTAAAGGAGGAACAT
HNRNPR	KPNA2	-	+	1	23660011	17	66039021	TCTGGCGTGCAACCTGGAATTGGAACGGAGGTGATGGCTCAGTGTTCCGAGACTTGGTTA
LZIC	RAC1	-	+	1	9996577	7	6431555	GCAACAATTACAAGATCTGGAGGAATGCAGCTTTGACAATTATTCTGCCAATGTTATGGT
PCNXL2	ODC1	-	-	1	233398704	2	10580994	TGAACACATAACTAATCACAGAAATCCAAGGCAACTCATGCAGCAATTCCAGAACCCCGA
RP11-193F5.4	HMGN2	-	+	14	61438990	1	26798997	AAAAAGAGAAAAGCTGATGCTGGCAAGGAGGAGCAGTGTGAAGAAGAGGCGAGAACGACC
RPL4	PFDN5	-	+	15	66795396	12	53691634	CACCGCTCTGGCCAGGGTGCTTTTGGAAACATGTATGTCCCTGGGAAGCTGCATGATGTG
BCL2L2-PABPN1	RPL30	+	-	14	23793498	8	99054078	TAACAGCAGGCCCCGGGGTCGCGTCTACAGGTGACTCTGACATCATTAGAAGCATGCCAG
DAP3	CMC4	+	-	1	155686919	X	154292308	GCTATTTCCCGCACCAATGAGAATGACCCGTTTTCTGGATATGCCGCAGAAGGATCCGTG
ANP32B	PTMS	+	+	9	100773671	12	6879558	GATGAGGACGACGATGAAGTCAGTGAGGAGGATGAAGCGGATCCCAAACGGCAGAAGACA
ATP2A2	RBM39	+	-	12	110734542	20	34330035	TAGTTCCTGGTGATATTGTAGAAATTGCTGATTCTCTCGGGCCTAGCCGTCCTTGGAACC
BCL2L11	LCMT1	+	+	2	111878765	16	25175919	GACTCTGACTCTCGGACTGAGAAACGCAAGATTGCCAACACTCCTGATAGCTGAATGTGT
CLCN6	CRNDE	+	-	1	11867247	16	54959125	GATGAGATTCTTCCAAGGAAAGACTATGAGGTGTTAAGTGTGATGCTTCCATAATACATT
CPSF6	SKP2	+	+	12	69656342	5	36183942	CGAGAGCGCGAATATCGTCATCGTTAGAAGATTAGTGACAAGAGCTGGGGTTAGGATCCG
NKTR	MED23	+	-	3	42674315	6	131943119	AAGGAATAAACATGCAATGAACCCAAAAGGGGTGTTCGAGATCTCTTAAAAGTGATTTTG
RNGTT	ZC3H13	-	-	6	89559474	13	46544600	TATTTGATATATGACATAATTAAATTCAATGAAGCGCTATAGAAATGAAGGGAGTCCCAG
SOS2	PEX11A	-	-	14	50647290	15	90229777	GCCAGACCTGCAGTTGCTCTACACTTTCAGAGCCACTCAGTACACATGCATGTTGCTTAG
UQCRC2	RPL37	+	-	16	21987564	5	40828053	CCTTTCCAACACAGATGTCCAAGCTGCCAAGAGTTTGGATCATAATACAAGAGAAGCACA
CTSA	TIAL1	+	-	20	44525679	10	121336262	TCCCAGTATCTGAAGCTGCTTAGCTCACAGGTTGACTATAGTCAATGGGGCCAATGGAGC
DUSP16	ANAPC11	-	+	12	12653453	17	79851428	CTTGGCTGCCAGCGAGATGTCCTCAACAAGAGACGGAGTTTCGTCATGTTGGCCAGGCCC
EXOSC2	UBL5	+	+	9	133574781	19	9939268	GGTTTCTTACAGGAAGGGGACCTTATCAGTCACGGATGATACCATCGGGGACCTTAAGAA
HIST1H2AC	RP11-200A1.1	+	+	6	26124977	3	134039762	CTTGTAGGTAGAAGGAAAAAAGGCACTAAGGGAGGAGGCCTCGCCACCATGCCCAGAGCA
IARS	TOX4	-	+	9	95050408	14	21960455	TTTGGATGGGATTGCCATGGCTTACCTGTGGTATATAAGAGGAAAACTGAGGCTGCCAAG
LEMD1	RPL30	-	-	1	205389583	8	99054078	AGCTTGGATTTTCACCTGGCCCAATACTACGTGACTCTGACATCATTAGAAGCATGCCAG
MAPK9	OGFOD3	-	-	5	179675973	17	80364358	TCATCCTGGGTATGGGCTACAAAGAGAACGGCATCCATTCTGGACTTGCACTCAGGGGCC
PCBD2	NOL10	+	-	5	134246156	2	10747437	AAAGAATTCTCCTTCCACAATTTTAATCAGGTTTTGGGTCCTGCTCCTCGGTGGTGTTCC
PCMTD1	POM121C	-	-	8	52758221	7	75070925	CTTCATCAAAAATAGTGATAGCTTTGATAAGGATCGTGGGACTTTACCAGATCGGTTTGT
PNISR	KLHDC1	-	+	6	99860427	14	50175877	ATTCAAACTTCAACAGAATGTGGCAACCAGTCTATTGAAGACAATGAAGTATATTTGCCT
RAB10	MXI1	+	+	2	26257604	10	111987947	CCTTCAATACTACCTTTATTTCCACCATAGAGTGTGAACATGGCTACGCCTCTTCATTCC
SIRPA	VPRBP	+	-	20	1896101	3	51436258	CTGGAGCAGGCACTGAGCTGTCTGTGCGCGCTGACAGCTCTGACAACTCTGATTTGGAAG
TJAP1	PLOD3	+	-	6	43471444	7	100850185	TCCCACTTCCGAAACCACAAGTTTGCCGATGCGCGGGCGGTGATGAACTTTGTGGTTCGC
TOP2A	GLRX5	-	+	17	38556124	14	96010284	TAGAGAAAATAGATGGCAAAATAATCATTGGCATTAAAGACTATTCCAACTGGCCCACCA
ZFR	ZMYM5	-	-	5	32400112	13	20413125	CAGCCAGTGGGCCATGATTATGTGGAAGAGATTCTTGGATCTCCCAGTCAGCTTCATTTC
COMMD1	RP11-390P2.4	+	+	2	62363114	6	139017734	TATGAAGGAGTTGGAGTTGTTGAAACCAAGGGTCTCCTATGGACAGAAGTGCGGGCAAGG
FNDC3B	RBM39	+	-	3	171851336	20	34301018	CAGAGGATGGAACACTTCAGTGCATTCAAGGTACAGGTTTGCAGATTCCGCCAGCAGCAC
IQGAP1	RPL30	+	-	15	90934105	8	99057627	GTACCTTTGTCATTTGGAAGAAGCGAAGAGGTTGGGGGCCGTCCCGCTCCTAAGGCAGGA
NAA15	PLK1	+	+	4	140270735	16	23700559	ACAAAGGCTTGGAAAAAGCACTCAAGCCAGGGTATCAGCTCTGTGATAACAGCGTGGGGG
NEK7	CMC2	+	-	1	198233365	16	81010076	GATGCTGGCGACCTATCCAGAATGATCAAGTACGTAGAAAACAGGACCAAGAGCAGGGAG
RNF145	PLOD2	-	-	5	158621724	3	145842016	GCTCCTCTATGCTGGACATCAAATTTCCAGATAAATTATTAGTCATAACTGTAGCAACAA
TOX2	POLR1D	+	+	20	42683166	13	28222516	TGGGACAGCCTGGGAGAGGAACAGAAGCAGGAAAGCAATAGAAGAACTGCTTAAGGAGGC
ZNF521	RAB28	-	-	18	22775124	4	13383218	TTCAGGTTCATGTTGCAAATCACATGATTGTTGATTTGGAGCATATGCGAACAATAAAAC
AGPAT5	CTD-2541M15.1	+	-	8	6566408	8	6527761	TTCTTCTTCGAGAATTACACCGGGGTCCAGGCAGCAGTCTGTCAACAACTATGGCATCCA
ERO1A	FERMT2	-	-	14	53138348	14	53348187	ATTCTTCAGATAACTTCTGTGAAGCTGATGGAAGTATATATTCAAGCCCAGGACTGTATA
CD109	EEF1A1	+	-	6	74481304	6	74229239	AATGCCTCTAATGATATTACAATGGAAAATATGGGAAAGGGCTCCTTCAAGTATGCCTGG
SUCO	TBX19	+	+	1	172502637	1	168260398	CTCCTGCCTCTTTCTGTGCTCTCTGGTCTGACGGATGTTTCCAGTCCTAAAGATTAGTGT
ZC3H8	SUCLG1	-	-	2	113007768	2	84652727	AAACTGGAGTGCGAGCAAATTCCCAAAAAAGGTCCAAATTCCAAGCCTGTAGTGTCCTTC
ZNF37BP	C10orf25	-	-	10	43046005	10	45495864	CAACACTAGTGGAATATGATCACATCCCAGGCTCCTCCTCAGCCATCCTGGCCGTGCTCA
SLC30A9	OCIAD1	+	+	4	42003797	4	48850416	GAGTGGAAAAAGTACCATCATTTGAAACAGGAATACTTTCAAGTCATCCCAAATATGGTT
ADK	VCL	+	+	10	75984349	10	75830428	AATCTTGGCTGAAGACAAACACAAGGAACTGGTTGAGAATGCTTGCACCAAGCTTGTCCA
AC009403.2	POMZP3	-	-	7	155436162	7	76247617	TTGGTGGATGGGTGAAGAGATGATAAAACGCTGTCTTGTCGACGGTCTCACTGATGCCTC
RP11-282O18.3	CDK2AP1	-	-	12	123744821	12	123746350	GAGAAAGTAACTTGTGGAATGGTGAGAAAGGCATCATTCACGCTAGAGGACTGGTTCGGG
CAV1	TES	+	+	7	116166743	7	115897348	CCTAAACACCTCAACGATGACGTGGTCAAGGTGTGTCAAGGATGCCACAATGCCATCGAC
CLIP4	FAM179A	+	+	2	29356682	2	29217591	GAGTGATTTTGAAAACATCGAAACCAAAAGGTCCCGGATGTTACAGGTCAGAGCCCTCCA
MMADHC	EPC2	-	+	2	150438641	2	149528361	CTCATGTGGCTGCTGCACCTCCAGATATATCCTCGTTTGGACCAAGCTAACCATTCATGT
POM121	VKORC1L1	+	+	7	72361649	7	65413658	GAGGTGAATTTCCATGTCAACATAGTCCAGATGGGGTCGAGGATTTGGTCTTTTGGGTTC
RP11-123O10.4	GRIP1	-	-	12	67462830	12	66990707	TCTGCTTGCAGGCAGAGGAGCAGGAGAGAGATGAGAGTCCCTACACTAAATCCGCCAGCC
RPF1	PRKACB	+	+	1	84948678	1	84700863	GAAACCACAGTAGACCCTAATGATGAAGAGGTTGAAGCTCCATTCATACCAAAGTTTAGA
ST3GAL1	SLA	-	-	8	134558017	8	134100084	CAGAGATGGACGGTCACTCAGCCTATGGAGCTGGAGGAGGTCACGTGACATTCACAGGCA
CCDC122	ENOX1	-	-	13	44448978	13	44241680	AGCAGATTCAGCGGTACTGGTGTATAATAGGTCCTTTGCTGCCAGCATGATGTCGTATTT
EIF4H	GPNMB	+	+	7	73602128	7	23299599	TCAGAGACAAAGACACAGATAAATTTAAAGGTCAGTATTTCCAGAAATTGGGACGATGTT
CTBP2	BUB3	-	+	10	126799559	10	124919923	ACTATAGAGTTTGTGGACAGATTTATATTGGTATATACCCTCTCAGTGTCTGGAGACCGG
ARSJ	MTHFD2L	-	+	4	114899593	4	75040223	ACCATCCAGGAGTCAGTTTATTACTGGAAAACATGAAGCCATTATTATATCAGGAACCGA
ST7	TES	+	+	7	116593745	7	115874588	CTTTGAAAATCAACGACAACTTGAGCACAGATGGGCTTAGGTCACGAGCAAGGATTTGGA
TOP2B	NGLY1	-	-	3	25665788	3	25761126	AAGCCCTCGTTATATTTTCACAATGTTAAGATAACAGTCTTCACTCCTATGCTGATTTTT
ZNF519	RAB31	-	+	18	14124349	18	9859225	TGGAGAACTACAGAAACCTCGTCTCCCTGGGCCGCCAGATCCCACCCTTGGACCCCCATG
BRD1	RP6-109B7.4	-	-	22	50187682	22	46463751	CTGCGCTGGGGCCGGAGGCGGGCGAGGAAGATCCGCCTAATGGGAATGGAGCCGGCAATT
SLC39A11	NSF	-	+	17	71080947	17	44714742	TTAGATGGAAGTCTTGGCTTTGCTGCAGGGTCTCCTTATATACATTTGACAAAGCCAAAC
ZHX1	MRPL13	-	-	8	124286362	8	121408364	AGCGCAGAGTCCGCGGCCGGCACGGGAAAGACCTGAAGATTATCGGCTATAAGAGAATAA
ANXA2	NARG2	-	-	15	60674541	15	60715961	TGAACATTGAAACAGCCATCAAGACCAAAGATTGGTGGAACGAGAATGCCTACACGCAGC
DNTTIP2	GCLM	-	-	1	94344633	1	94360284	GCCGCGTCGGCTGAAAGTTCCGGGCAAAAGGTAAAACCAAATAGTAACCAAGTTAATCTT
FAM208A	PSMD6	-	-	3	56672734	3	63999283	TGGGGAAACATGGTGAGAAACAAACACCAGCGGTTGTGGAACAGGAAATGAAAAAGGACT
GGCT	GARS	-	+	7	30544185	7	30665850	GCGGCGTTCTTCTGTGTGGCCCGCCTGCAGGGAATTCACAATTGAAACTGAAGGGAAAAC
GNAO1	RP11-463O9.5	+	-	16	56370772	16	86598924	GACCAGGTGCTCCACGAAGACGAAACCACGGTTTCCTTGCACCCTTCCTGGCTGTTCATC
NOP56	SNRPB	+	-	20	2637541	20	2443407	CTGGATGTCATGAAGGAAGCAATGGTTCAGGCATGATGGGCCCACCTCCTGGTATGAGAC
TBC1D9B	RNF130	-	-	5	179315103	5	179390564	AAAGCCAGTGTTGTGGACCCTAGCACAGAGAAGAATGGTTTATTATTGCCAGTTTTGGCC
AHI1	PSMB1	-	-	6	135748305	6	170858201	CAATTCTTCTGTATATTTACGATTTCCATGTACTATACTGGCAATTGCTGGAGAAGATTT
DLX5	NHLRC3	-	+	7	96653581	13	39613273	ACCGCGTCCCAAGCGCCACCAACCAGCCAGGTTTTGAGGAACTTTACTTTTGCAGTTTCC
RGS5	MTHFD1L	-	+	1	163276023	6	151413603	GGTGACACTTCGGGTCTCTCACAGAGGAAGATGAGCACCATGCCAGGACTGCCCACCCGG
KDM2A	ZNF532	+	+	11	66999431	18	56601665	GATGAAGATGCTCTCATTGCTGATGTAAAGAAGACTTGCACTATCTGCCAGATGCTGCTT
DPP9	ENDOG	-	+	19	4714093	9	131583018	GGCCCCACTCCCACCGCCTCTACTACCTGGGTGCCCCACCTCAACCAGAATGCCTGGAAC
TRIM52	NUP133	-	-	5	180687002	1	229634053	CCTTTGGAGGAGGTGGTGCAGGAGTACCAGGGAGGAAGTTTTATTTTGTCTTCATCAGGA
AFG3L2	RNPC3	-	+	18	12351305	1	104097656	CGGGGCGTTTCGACAGGCAGATCTTTATTGGTTTTTTTGAATCCCGTGTCCTTCAAGTGC
TNFRSF1A	PTMS	-	+	12	6450942	12	6878769	TCCACCGTGCCTGACCTGCTGCTGCCACTGGACCTGAAGGAGAAGAAGGAGAAGGTGGAG
BCL11B	PPP2R5C	-	+	14	99723808	14	102323023	GCATCTGTCCCAAGCAGGAGAACATTGCAGATGTTCCTCCTGCTGATCAAGAGAAGCTTT
GBE1	RYBP	-	-	3	81810526	3	72428578	GAAGCCCTACGCCGTGGACTTCCAGCGCAGAAAACCTCGGATCAATTCTCAGCTGGTGGC
NCOA7	CTA-293F17.1	+	-	6	126107359	7	20368479	GCCTCCTGTGTCCCAACCGGCCTGAGTCAAGTGTTGATATATATACTAATCCAGAACAAC
TRAF2	ITPR1	+	+	9	139811067	3	4878458	AGATTCCACGCCATCGGCTGCCTCGAGACGGAAAGAAACCTTGACTGGTTCCCCAGGATG
RTFDC1	RP4-799D16.1	+	-	20	55052180	1	25370327	TGTGGGCCTGGAGATGAACGGCCGACACAGATGGATGCAGGAGGAGTCGGAGCTGGAGGA
ACTR6	DHDDS	+	+	12	100594697	1	26759382	CAAAATCGGTTACAGCCATGAAAATGTGTCATTACCTGGCTGGTGTTTGCTTGTTCTGGA
ERBB2IP	KTN1	+	+	5	65222634	14	56078737	AGCTGCCCTGAGACGGTGTCCCGCCGAAAGGTTTTATAGGATCACATTGACAAAAGTACC
FBXO32	ANXA13	-	-	8	124525438	8	124724993	CAGCAGCTGAACAACATTCAGATCACCAGGGCTAAAGCGAGCAGTCCTCAGGGTTTTGAT
