# Supplementary material for: INTEGRATE: gene fusion discovery using whole genome and transcriptome data
Source: HighWire-hosted journal article supplement (doi:10.1101/gr.186114.114), 2015-11-10
Supplement: Supplemental_Table3.xlsx [file Supplemental_Table3.xlsx]

## Sheet: Sheet1
Supplementary Table 3. Exact genomic breakpoints called by INTEGRATE to support HCC1395 fusions
Note: Coordinates are based on Genome Reference Consortium Human Build 37 (GRCh37).
5p_gene	3p_gene	chr_5p	bk_5p	chr_3p	bk_3p
EIF3K	CYP39A1	19	39124623	6	46608699
MDH1	RP11-357C3.3	2	63827838	X	62622236
LMF1	FOXK2	16	1012773	17	80553042
GS1-124K5.2	RP11-147C23.1	7	65898846	1	96461779
RNGTT	RPF1	6	89554518	1	84911888
RP11-83A24.2	KCNQ5	4	140339335	6	73890696
PLA2R1	RBMS1	2	160826997	2	161160171
RAB7A	LRCH3	3	128487474	3	197591082
SHISA5	RP11-24C3.2	3	48514370	3	48483272
UNC5C	STPG2	4	96179911	4	98364655
TMEM104	RAB37	17	72792787	17	72712716
MAVS	PANK2	20	3863935	20	3887764
ZNF37BP	CEP164P1	10	43024111	10	45582412
POU2F1	NME7	1	167394767	1	169129928
NRL	DHRS4-AS1	14	24572404	14	24404246
KPNA1	EEFSEC	3	122163034	3	127905568
NOM1	MNX1-AS2	7	156775822	7	156774864
EFTUD2	KIF18B	17	42941595	17	43008044
OSBPL9	RP11-191G24.1	1	52180174	1	51992695
MFSD3	MROH1	8	145737377	8	145248538
WARS	DEGS2	14	100823083	14	100628510
HNRNPUL2	AHNAK	11	62484336	11	62315471
CCDC117	CTA-292E10.6	22	29207341	22	29207801
LDLRAD3	PRR5L	11	36150547	11	36344953
CASD1	GNG11	7	94231522	7	93552377
RP11-85K15.2	BAZ1A	14	35368100	14	35382660
