# Supplementary material for: INTEGRATE: gene fusion discovery using whole genome and transcriptome data
Source: HighWire-hosted journal article supplement (doi:10.1101/gr.186114.114), 2015-11-10
Supplement: Supplemental_Table5.xlsx [file Supplemental_Table5.xlsx]

## Sheet: Sheet1
Supplementary Table 5. 45 recurrent and functionally recurrent gene fusions in hotspots from 62 TCGA breast cancer samples.
5p gene	3p gene	5p band	3p band
AK311167/LOC100132352	PPP1R1B	NA	17q12
CDK12	FBXL20	17q12	17q12
CDK12	PPM1E	17q12	17q22
CKS1B	SHC1	1q21.3	1q21.3
CLTC	LOC645638	17q23.1	17q23.1
FBXL20	GDPD5	17q12	11q13.4
FBXL20	MIEN1	17q12	17q12
FBXL20	MYO1D	17q12	17q11.2
FBXL20	SIRT6	17q12	NA
FRG1B	PPP1R1B	NA	17q12
GAB2	MYO7A	11q14.1	11q13.5
GAB2	PLXDC1	11q14.1	17q12
HOOK1	RAB6A	NA	11q13.4
JUP	CTSD	17q21.2	NA
KANSL1	ARL17A	17q21.31	17q21.31
KDM2A	EVI2A	11q13.2	17q11.2
KDM2A	RHOD	11q13.2	11q13.2
KDM2A	RPS6KB2	11q13.2	11q13.2
KRT19	CTSD	17q21.2	NA
KRT19	CTSZ	17q21.2	NA
LOC100288778	DGAT2	NA	11q13.5
LOC440434	RSF1	17q12	11q14.1
MRPL27	TMEM99	17q21.33	17q21.2
NARS2	PLXDC1	11q14.1	17q12
NPEPPS	RSF1	17q21.32	11q14.1
RARA	MYO1D	17q21.2	17q11.2
RARA	NARS2	17q21.2	11q14.1
RARA	PCTP	17q21.2	17q22
RARA	PGAP3	17q21.2	17q12
RARA	PLXDC1	17q21.2	17q12
RARA	POLDIP2	17q21.2	17q11.2
RARA	PRR11	17q21.2	17q22
RARA	ZNF595/ZNF718	17q21.2	NA
RARA	ZNF732/ZNF141	17q21.2	NA
RNF169	CADM2-AS2	11q13.4	NA
RNF169	CBX1	11q13.4	17q21.32
RPRD2	SHC1	1q21.3	1q21.3
SBF2	TMEM99	NA	17q21.2
SLC22A20	HORMAD1	11q13.1	1q21.3
STAT3	PTRF	17q21.2	17q21.2
TEX2	LOC645638	17q23.3	17q23.1
TMEM123	BC045769	NA	17q21.31
WASH7P	DGAT2	NA	11q13.5
ZFP91/ZFP91-CNTF	RAB6A	NA	11q13.4
