# Supplementary material for: INTEGRATE: gene fusion discovery using whole genome and transcriptome data
Source: HighWire-hosted journal article supplement (doi:10.1101/gr.186114.114), 2015-11-10
Supplement: Supplemental_Table6.xlsx [file Supplemental_Table6.xlsx]

## Sheet: Sheet1
Supplementary Table 6. Read-throughs with canonical boundaries called by INTEGRATE from HCC1395 cell line.
Note: Coordinates are based on Genome Reference Consortium Human Build 37 (GRCh37).
5p	3p	Encompassing RNA-seq reads	Spanning RNA-seq reads	chr_5p	junction_5p	chr_3p	junction_3p	GSNAP	TopHat2	STAR
RP11-958N24.2	NPIPA7	15	672	16	16470913	16	16477649	1	1	0
AP000525.9	NBEAP3	26	528	22	16162397	22	16124742	1	1	1
CTBS	GNG5	131	112	1	85028940	1	84967509	1	1	1
KIAA1147	RP5-894A10.2	91	72	7	141363972	7	141352181	1	1	0
JAK3	INSL3	94	60	19	17941312	19	17927323	1	1	1
JUP	KRT14	124	13	17	39777218	17	39739501	1	0	0
PAM16	AC005356.1	58	62	16	4390921	16	4375271	1	0	0
SMUG1	RP11-834C11.5	67	53	12	54559158	12	54515060	1	1	1
CORO7-PAM16	AC005356.1	58	53	16	4390921	16	4375271	1	0	1
PAM16/CORO7-PAM16	AC005356.1	47	56	16	4390921	16	4376431	0	1	0
NR2F2	RP11-522B15.3	61	31	15	96877832	15	96933952	1	1	0
TMEM63A	RP11-285F7.2	50	40	1	226036193	1	226028584	1	1	0
NAA40	COX8A	42	35	11	63721521	11	63744015	0	1	0
RP11-834C11.12	HOXC4	37	23	12	54379794	12	54447060	1	1	0
PRR16	CTD-2334D19.1	28	24	5	119800340	5	120126473	1	1	0
AC092651.1	AC125232.1	51	1	2	87345915	2	87258939	1	0	0
FBXL8	HSF4	27	21	16	67193959	16	67200525	1	1	0
SLC39A1	CRTC2	26	17	1	153934696	1	153927541	1	1	1
C1RL-AS1	CLSTN3	23	16	12	7273221	12	7285742	1	1	0
VAMP1	CD27-AS1	24	15	12	6574056	12	6557806	1	1	0
CHCHD10	VPREB3	13	25	22	24110021	22	24094930	1	1	0
MED15P9	MZT2B	21	17	2	130887371	2	130948268	1	1	1
IKBKG	CTAG1A	15	20	X	153784591	X	153815074	1	1	0
LDLRAP1	RP11-70P17.1	25	10	1	25883758	1	25916847	1	1	0
LINC00843	AGAP6	26	9	10	51732902	10	51749136	1	1	0
RABAC1	CTD-2575K13.6	18	16	19	42462438	19	42414015	1	1	0
RP11-1070N10.5	TCL6	23	11	14	96108207	14	96118563	1	1	0
SHISA9	U91319.1	24	9	16	13297406	16	13444278	1	1	0
AC026150.8	GOLGA8Q	12	18	15	30838172	15	30846114	1	1	0
ZNF738	CTD-2561J22.2	12	18	19	21558766	19	21566906	0	1	0
RP11-175I17.2	AGAP4	15	15	10	46358434	10	46344291	1	1	0
ZYX	EPHA1-AS1	18	12	7	143087070	7	143112292	1	1	0
RP11-467H10.2	CCDC146	14	15	7	76673095	7	76866346	1	0	0
RP1-122P22.2	RIN2	17	12	20	19780391	20	19870302	1	1	0
TOPORS	DDX58	14	14	9	32550772	9	32500803	1	1	0
MKLN1-AS1	MIR29B1	19	9	7	130630479	7	130569076	1	1	0
RP5-827C21.2	COA6	15	12	1	234492836	1	234510135	1	1	0
ENO2	ATN1	14	12	12	7031565	12	7043191	1	0	0
PZP	A2M	22	4	12	9317735	12	9242952	1	0	0
CRELD1	PRRT3-AS1	14	11	3	9985199	3	9989864	1	1	0
C19orf60	TMEM59L	16	9	19	18699710	19	18724826	1	1	1
DERL1	RP11-557C18.4	12	12	8	124031435	8	123989266	1	1	0
PTS	RP11-356J5.12	15	9	11	112108229	11	112162495	1	1	0
MAPKAPK3	RP11-804H8.6	18	6	3	50655215	3	50708607	1	1	0
SUMO2	HN1	20	4	17	73170847	17	73144624	1	1	0
KRT16P2	AC022596.6	22	2	17	16733709	17	16722115	1	0	0
PRIM1	NACA	14	9	12	57127931	12	57108419	1	1	0
SIDT2	TAGLN	13	9	11	117066631	11	117073909	1	1	0
PSME1	RP11-468E2.5	17	5	14	24607769	14	24609653	1	1	0
ARSG	RP11-120M18.2	16	5	17	66397591	17	66437236	1	1	0
FBXL19	AC135048.13/ORAI3	16	5	16	30953857	16	30967832	1	1	0
ERGIC1	RPL26L1	9	11	5	172362313	5	172386992	1	1	0
AEN	ISG20	10	10	15	89169980	15	89195417	1	1	0
SRSF1	RP11-159D12.5/RP11-159D12.2	10	10	17	56083162	17	56067010	1	0	0
IFRD1	LSMEM1	12	8	7	112112916	7	112124998	1	1	0
RRM2	C2orf48	12	8	2	10269281	2	10282081	1	1	0
SRSF1	RP11-159D12.2/RP11-159D12.5	9	10	17	56083162	17	56066405	0	1	0
LINC00968	PENK	13	6	8	57472012	8	57358985	1	1	0
OGDH	PPIA	17	2	7	44721447	7	44841223	1	0	0
FAM175A	HELQ	9	9	4	84384647	4	84374910	1	1	0
LINC00493	DTD1	11	7	20	18548240	20	18574465	0	1	0
SLC29A1	HSP90AB1	11	7	6	44200165	6	44216513	1	1	0
TEAD2	CTC-301O7.4	12	6	19	49845695	19	49835311	1	1	0
DUS4L	BCAP29	13	5	7	107217037	7	107221309	1	1	0
IKBKGP1	CTAG1B	4	12	X	153876336	X	153845865	1	1	0
RP11-403B2.7	NBEAP1	6	10	15	20961259	15	20876442	1	1	0
RASA4CP	POLR2J4/RP5-1165K10.2	7	9	7	44070379	7	44056032	1	0	0
CLUHP3	ZNF720	9	7	16	31718320	16	31765177	1	1	1
OSBPL1A	RP11-799B12.4	11	5	18	21745029	18	21739473	1	1	0
TPD52L2	DNAJC5	11	5	20	62505169	20	62559805	1	1	0
CTD-2342J14.6	TMEM205	12	4	19	11482364	19	11453740	1	0	0
LMAN2	MXD3	6	9	5	176761285	5	176738380	1	1	0
LINC00630	LL0XNC01-237H1.2	9	6	X	102120080	X	102152692	1	1	0
RASA4DP	POLR2J2	10	5	7	102323726	7	102309362	1	0	0
DCAF8	RP11-536C5.7	11	4	1	160188114	1	160171989	1	1	0
LGALS1	NOL12	14	1	22	38074661	22	38084022	1	0	0
MFGE8	HAPLN3	6	8	15	89444782	15	89436205	1	1	1
GATAD1	AC007566.10	8	6	7	92083999	7	92090724	1	1	0
STX6	RP11-46A10.4	8	6	1	180953813	1	180918835	1	1	0
ZNF77	AC006277.2	9	5	19	2936522	19	2917003	1	1	0
FEN1	FADS2	10	4	11	61560500	11	61605360	1	1	0
RP11-58E21.3	C14orf182	10	4	14	50477652	14	50459496	1	1	0
EMC3	PRRT3	11	3	3	10011403	3	9990785	1	1	0
RPL36	CATSPERD	12	2	19	5690611	19	5727355	1	1	0
ETV2	COX6B1	7	6	19	36134655	19	36142251	1	1	0
HORMAD1	GOLPH3L	7	6	1	150675786	1	150667132	1	1	0
PSMB2	RP4-728D4.2	7	6	1	36070834	1	36039961	1	1	0
LSM14A	KIAA0355	9	4	19	34712643	19	34790828	1	1	0
CECR7	IL17RA	10	3	22	17528316	22	17577976	1	1	0
HIATL2	ZNF782	10	3	9	99680925	9	99623810	1	1	0
FZD4	RP11-736K20.5	5	7	11	86665843	11	86632964	1	1	0
CTNNBIP1	CLSTN1	7	5	1	9931245	1	9833330	1	1	0
MICALL1	POLR2F	7	5	22	38337540	22	38352849	1	1	0
TEAD2	SLC6A16	7	5	19	49845695	19	49797084	1	1	0
DCUN1D2	ADPRHL1	8	4	13	114113627	13	114098740	1	1	0
RP11-315I20.1	POLR3GL	8	4	1	145475982	1	145460097	1	1	0
PPCS	CCDC30	10	2	1	42923021	1	42946237	1	1	0
CMC2	RP11-314O13.1	5	6	16	81030919	16	80874016	1	1	0
COX6B1	UPK1A	5	6	19	36145573	19	36159556	1	1	0
C19orf47	AKT2	6	5	19	40827935	19	40762833	1	1	0
CIRBP	C19orf24	6	5	19	1274439	19	1277298	1	1	0
RPLP1	RP11-279F6.1	6	5	15	69745359	15	69760732	1	0	0
DMKN	KRTDAP	7	4	19	35989500	19	35979704	1	1	0
CHCHD5	AC012442.5	9	2	2	113343942	2	113372008	1	1	0
RPS11	FCGRT	5	5	19	50001303	19	50029586	1	0	0
LYPLA1	TCEA1	7	3	8	54963571	8	54922990	1	1	0
MRPS10	GUCA1B	7	3	6	42176596	6	42156320	1	1	0
RP11-554I8.2	LINC00707	7	3	10	6779590	10	6823448	1	1	0
ASAP3	TCEA3	3	6	1	23757528	1	23745570	0	1	0
PCED1B	RP11-493L12.4	3	6	12	47617455	12	47651322	1	1	0
BCRP8	RTDR1	4	5	22	23522105	22	23482409	1	1	0
BCKDHB	RP11-250B2.3	5	4	6	80982938	6	81162978	1	1	0
NPM1	FGF18	5	4	5	170834778	5	170863277	1	0	0
VAC14	MTSS1L	5	4	16	70726724	16	70714867	1	1	0
Z83851.1	TCF20	5	4	22	42764721	22	42610853	1	1	0
AZGP1	GJC3	6	3	7	99569369	7	99520892	1	1	0
PPP2R4	RP11-247A12.2	6	3	9	131904831	9	131971465	1	1	0
RPL23	C17orf98	6	3	17	37006615	17	36991341	1	1	0
GPR137	RP11-783K16.10/TEX40	7	2	11	64052852	11	64068459	1	1	0
MLLT6	CISD3	7	2	17	36881229	17	36887048	1	1	0
UBE2D2	CXXC5	7	2	5	139003046	5	139060132	1	1	0
WAC-AS1	RP11-351M16.3	7	2	10	28821371	10	28725071	1	0	0
PPRC1	NOLC1	2	6	10	103909086	10	103916831	1	1	0
ARL16	OXLD1	3	5	17	79650566	17	79632491	1	0	0
PSME3	AOC2	3	5	17	40991397	17	41001307	1	1	0
AC008440.10	MYADM	4	4	19	54368982	19	54373092	1	1	0
INPP5K	MYO1C	4	4	17	1399354	17	1387442	0	1	0
LMNA	SEMA4A	4	4	1	156107534	1	156126365	0	1	0
POLA2	CDC42EP2	4	4	11	65063461	11	65089092	1	1	0
APCDD1L-AS1	STX16/STX16-NPEPL1	5	3	20	57122984	20	57242653	1	1	0
MED12	NLGN3	5	3	X	70361814	X	70368056	1	1	0
PGBD2	AL672183.2	5	3	1	249211600	1	249231242	0	1	0
SLC27A1	PGLS	5	3	19	17581516	19	17627089	1	1	0
TVP23C/TVP23C-CDRT4	RP11-849N15.4	5	3	17	15443747	17	15319426	1	1	0
AC007551.3	HERPUD2	6	2	7	35797789	7	35712811	1	1	0
ALG14	CNN3	6	2	1	95492685	1	95368959	1	1	0
COQ2	RP11-576N17.5	6	2	4	84183742	4	84159675	1	1	0
FKBP14	SCRN1	6	2	7	30065928	7	30008525	1	1	0
PDE12	RP11-755B10.2	6	2	3	57545115	3	57640645	1	1	0
COMMD2	WWTR1	7	1	3	149468465	3	149443259	1	1	0
GK5	TFDP2	7	1	3	141889167	3	141820577	1	0	0
RPS14	CD74	7	1	5	149825172	5	149786715	1	0	0
RUNDC1	RPL27	7	1	17	41142453	17	41154800	1	0	0
MORF4L2-AS1	TMEM31	2	5	X	102944408	X	102967288	1	1	0
TMEM107	RP11-599B13.6/VAMP2	2	5	17	8079518	17	8065567	1	1	0
GFOD2	ENKD1	3	4	16	67719360	16	67697323	1	1	0
HDAC8	CITED1	3	4	X	71571583	X	71522660	1	1	0
RP11-552M11.4	OVGP1	3	4	1	111983760	1	111969059	1	1	0
RPL11	TCEB3	3	4	1	24021281	1	24075567	1	1	0
STK11	AC004221.2	3	4	19	1223171	19	1239521	1	0	0
LSM10	STK40	4	3	1	36857959	1	36833455	1	1	0
METRN	FAM173A	4	3	16	765984	16	771702	1	1	0
HOTAIRM1	HOXA-AS2	5	2	7	27136007	7	27161645	1	1	0
RPL26L1	ATP6V0E1	5	2	5	172387044	5	172421825	1	1	0
TBPL2	ATG14	5	2	14	55890877	14	55864090	1	1	0
ZNF316	AC073343.13	5	2	7	6684224	7	6704739	1	1	0
CHUK	ERLIN1	6	1	10	101950626	10	101914617	1	1	0
KRIT1	LRRD1	6	1	7	91830621	7	91779848	1	0	0
PCOLCE-AS1	LRCH4	6	1	7	100190448	7	100179938	1	0	0
PPCDC	C15orf39	6	1	15	75336855	15	75494400	1	1	0
PPIH	RP5-994D16.3	6	1	1	43133111	1	43147325	1	1	0
UBE2Q2	FBXO22	6	1	15	76175765	15	76196970	1	1	0
PBXIP1	PMVK	2	4	1	154918048	1	154904828	1	0	0
RP4-535B20.1	JAK1	2	4	1	65533287	1	65351942	1	1	0
SYNM	RP11-6O2.3	2	4	15	99672018	15	99685575	1	1	0
GPR108	C3	3	3	19	6730998	19	6723452	1	0	0
RPL38	TTYH2	3	3	17	72200329	17	72218796	1	0	0
SMYD3	RP11-522M21.3	3	3	1	245927343	1	245837034	1	1	0
Z97634.3	NME4	3	3	16	433429	16	449123	0	1	0
BMF	RP11-521C20.2	4	2	15	40396381	15	40367405	1	0	0
CALCB	INSC	4	2	11	15099016	11	15170776	1	1	0
FAM214A	ARPP19	4	2	15	52876942	15	52849297	1	0	0
GGPS1	TBCE	4	2	1	235492093	1	235543464	1	0	0
KLHDC3	RRP36	4	2	6	42987104	6	42992870	1	1	0
LBH	AC109642.1	4	2	2	30457373	2	30575297	1	1	0
SYCE1L	RP11-538I12.3	4	2	16	77246266	16	77323352	1	0	0
ZDHHC1	TPPP3	4	2	16	67429090	16	67424827	1	1	0
AC003665.1	RP11-6N17.4	5	1	17	45995818	17	45971266	0	1	0
DHTKD1	SEC61A2	5	1	10	12162266	10	12175307	1	0	0
GTF2A1	RP11-114N19.3	5	1	14	81651875	14	81631537	1	0	0
MAGIX	PLP2	5	1	X	49021699	X	49029628	1	1	0
NDE1	AF001548.5	5	1	16	15785180	16	15826850	1	1	0
RC3H1	SERPINC1	5	1	1	173910403	1	173883691	1	1	0
TIMM23	AGAP7	5	1	10	51606988	10	51483174	1	0	0
MPC2	ADCY10	1	4	1	167889217	1	167874231	1	1	0
FARSA	SYCE2	2	3	19	13034965	19	13015306	1	1	0
HOXC10/RP11-834C11.12	RP11-834C11.6	2	3	12	54379794	12	54496477	0	1	0
PPP1R32	RP11-286N22.10	2	3	11	61254533	11	61267548	1	1	0
C12orf44	OR7E47P	3	2	12	52464267	12	52502023	1	0	0
CDKN1C	KCNQ1-AS1	3	2	11	2905229	11	2861365	1	0	0
FBXO30	RP3-466P17.2	3	2	6	146125508	6	146058047	1	0	0
FLVCR1-AS1	C1orf227	3	2	1	213031108	1	213009215	1	1	0
HOXC10/RP11-834C11.12	RP11-834C11.4	3	2	12	54379794	12	54526627	1	1	0
IGSF5	PCP4	3	2	21	41165540	21	41270452	0	1	0
IL6R	RP11-350G8.9	3	2	1	154427057	1	154453977	1	1	0
LRRC8B	RP11-413E1.4	3	2	1	90050348	1	90133869	1	1	0
MBLAC1	AC073842.19	3	2	7	99724687	7	99738062	1	0	0
OBSL1	CHPF	3	2	2	220416251	2	220406338	1	1	0
RAD18	OXTR	3	2	3	8932073	3	8792094	1	1	0
RP1-167A14.2	RNASET2/RP11-514O12.4	3	2	6	167386227	6	167365976	1	0	0
RP11-114B7.6	SYNC	3	2	1	33190679	1	33161224	1	1	0
CSNK2A1	TBC1D20	4	1	20	467020	20	425694	1	0	0
CTC-301O7.4	SLC6A16	4	1	19	49834874	19	49797624	0	1	0
FAM200B	BST1	4	1	4	15688771	4	15709269	1	0	0
OGG1	ARPC4-TTLL3	4	1	3	9796569	3	9839461	1	0	0
RP11-452F19.3	DISP1	4	1	1	222988420	1	223045774	1	0	0
ADCY3	PTRHD1	1	3	2	25043593	2	25013144	1	1	0
FKBP2	RP11-783K16.5	1	3	11	64010969	11	64015649	1	1	0
LHX6	NDUFA8	1	3	9	124975885	9	124914524	1	1	0
AP000275.65/C21orf59	TCP10L	2	2	21	33976435	21	33951004	1	1	0
ASNSD1	ANKAR	2	2	2	190532671	2	190554690	1	1	0
C11orf73	CCDC81	2	2	11	86048572	11	86097154	1	1	0
DPM2	PIP5KL1	2	2	9	130698832	9	130690344	1	1	0
FLNC	ATP6V1F	2	2	7	128498271	7	128505897	1	1	0
HCG25	RPS18	2	2	6	33218488	6	33240503	0	1	0
LINC00637	CTD-2134A5.3	2	2	14	104320739	14	104343815	1	1	0
RAB9A	OFD1	2	2	X	13722021	X	13753465	1	1	0
RP11-377D9.3	KIAA1467	2	2	12	13175095	12	13208880	1	1	0
RP11-452L6.7	AHSP	2	2	16	31520357	16	31539535	1	1	0
SPATA5L1	C15orf48	2	2	15	45710880	15	45723030	1	1	0
TAPBP	RGL2	2	2	6	33280994	6	33264809	1	1	0
WRB	SH3BGR	2	2	21	40763762	21	40834486	1	1	0
AP1G1	PHLPP2	3	1	16	71772845	16	71748415	1	0	0
FBXW9	DHPS	3	1	19	12799897	19	12791010	1	1	0
GXYLT2	PPP4R2	3	1	3	73016870	3	73096507	0	1	0
ISCA1	C9orf153	3	1	9	88886922	9	88844453	1	0	0
MBD4	EFCAB12	3	1	3	129151941	3	129140210	1	1	0
MEGF8	LIPE-AS1	3	1	19	42874983	19	42912594	1	0	0
PXN	RPLP0	3	1	12	120651645	12	120637260	1	1	0
RP1-197B17.3	SLC48A1	3	1	12	48113482	12	48149695	1	1	0
SLC3A2	AP000438.2	3	1	11	62655690	11	62685833	1	1	0
SSBP4	CTD-3137H5.1	3	1	19	18544423	19	18552354	0	1	0
AC098828.2	LAPTM4A	1	2	2	20306501	2	20240652	1	0	0
AC099850.1	PRR11	1	2	17	57184952	17	57247180	0	1	0
DDX56	NPC1L1	1	2	7	44606047	7	44578416	1	1	0
PAFAH1B2	SIDT2	1	2	11	117034608	11	117052230	1	0	0
RPS7	COLEC11	1	2	2	3625364	2	3652060	0	1	0
TBC1D23	NIT2	1	2	3	100039815	3	100058049	1	1	0
TMEM8B	LINC00961	1	2	9	35853254	9	35911683	1	1	0
TYSND1	AIFM2	1	2	10	71906289	10	71883663	1	1	0
UFC1	USP21	1	2	1	161128001	1	161131887	1	1	0
AC112721.1	COL6A3	2	1	2	238330768	2	238305370	1	1	0
AGPS	AC073834.3	2	1	2	178388533	2	178482248	1	0	0
AMOTL2	RPL39P5	2	1	3	134077382	3	134070694	0	1	0
ARFGAP1	COL20A1	2	1	20	61917794	20	61959339	1	1	0
CTA-714B7.5	RP1-272J12.1	2	1	22	35567428	22	35467343	1	0	0
CTD-2231H16.1	PLEKHG4B	2	1	5	113563	5	143371	1	1	0
DCAF7	TACO1	2	1	17	61662690	17	61682000	1	1	0
DNAJB9	AC005487.2	2	1	7	108212387	7	108242022	1	0	0
DNAJC8	PTAFR	2	1	1	28525967	1	28476184	0	1	0
ERI1	RP11-10A14.3	2	1	8	8946079	8	9002933	1	0	0
GS1-251I9.4	TMEM55A	2	1	8	92081807	8	92033484	1	1	0
GTF3C2	MPV17	2	1	2	27550044	2	27545315	1	0	0
KHDC1	RP11-257K9.8	2	1	6	74001721	6	73935020	1	1	0
LINC00944	RP11-407A16.3	2	1	12	127215309	12	127094580	1	0	0
LINC01001	RP11-304M2.6	2	1	11	131467	11	121279	1	0	0
MAPK3	GDPD3	2	1	16	30127956	16	30122709	1	1	0
MFAP3	GALNT10	2	1	5	153529506	5	153674478	1	0	0
NFATC2IP	SPNS1	2	1	16	28970421	16	28986713	1	0	0
NNT-AS1	PAIP1	2	1	5	43602880	5	43555932	0	1	0
PAOX	MTG1/RP11-108K14.8	2	1	10	135203251	10	135209281	1	0	0
PARL	MAP6D1	2	1	3	183551280	3	183535782	1	1	0
PGD	APITD1/APITD1-CORT	2	1	1	10478982	1	10500470	1	0	0
POLR1C	MAD2L1BP	2	1	6	43485115	6	43604383	1	1	0
SHISA4	RP11-307B6.3	2	1	1	201858744	1	201869106	1	1	0
SLC7A6	PRMT7	2	1	16	68330416	16	68346079	1	0	0
SSSCA1	EHBP1L1	2	1	11	65338441	11	65346851	1	1	0
TBCEL	TECTA	2	1	11	120930794	11	120980207	0	1	0
TRAPPC6B	SEC23A	2	1	14	39639219	14	39565203	1	1	0
WEE2	SSBP1	2	1	7	141429473	7	141442029	1	0	0
C14orf142	MOAP1	1	1	14	93673175	14	93650904	1	0	0
CTSC	RAB38	1	1	11	88029301	11	87882843	1	1	0
CYB5D1	CHD3	1	1	17	7762142	17	7793094	1	0	0
ENTPD4	LOXL2	1	1	8	23291830	8	23225690	1	0	0
FNBP4	MTCH2	1	1	11	47788621	11	47648632	1	0	0
L3HYPDH	GPR135	1	1	14	59942587	14	59925575	1	1	0
MTF2	CCDC18	1	1	1	93584958	1	93659217	1	0	0
NOP9	LTB4R	1	1	14	24773804	14	24785164	1	0	0
PDE12	RP11-755B10.4	1	1	3	57545115	3	57585896	1	0	0
PITPNB	MN1	1	1	22	28254375	22	28146764	1	1	0
PLCG1	RP3-511B24.6	1	1	20	39802951	20	39817192	1	0	0
RP11-15H20.6	ZNF724P	1	1	19	23443666	19	23414969	1	0	0
RPL7A	SURF2	1	1	9	136217926	9	136228045	1	0	0
SNX33	ODF3L1	1	1	15	75942914	15	76020029	1	0	0
SRGAP2C	AL592494.5	1	1	1	121129692	1	121204983	1	1	0
STK39	AC016723.4	1	1	2	168821172	2	168757242	1	0	0
ZNF264	AURKC	1	1	19	57705369	19	57743155	0	1	0
ZNF418	CTD-2583A14.9	1	1	19	58439345	19	58423428	1	0	0
