# Supplementary material for: INTEGRATE: gene fusion discovery using whole genome and transcriptome data
Source: HighWire-hosted journal article supplement (doi:10.1101/gr.186114.114), 2015-11-10
Supplement: Supplemental_Table7.xlsx [file Supplemental_Table7.xlsx]

## Sheet: Sheet1
Supplementary Table 7. Read-throughs with canonical exonic boundaries called by INTEGRATE from TCGA 62 breast cancer patients
Note: UCSC genes and alignments by TopHat2 and BWA are used as input. Coordinates are based on Genome Reference Consortium Human Build 37 (GRCh37).
5P	3P	Tier	Type	Num_Samples	Samples	Chr1	Chr2	Junc1	Junc2
AK311578	G3BP2	3	Read_Through	56	TCGA-A1-A0SM;TCGA-A2-A04T;TCGA-A2-A0CM;TCGA-A2-A0D1;TCGA-A2-A0D2;TCGA-A2-A0EY;TCGA-A2-A0YG;TCGA-A2-A259;TCGA-A2-A25B;TCGA-A7-A0CE;TCGA-A7-A13D;TCGA-A7-A26G;TCGA-A8-A075;TCGA-A8-A07B;TCGA-A8-A08B;TCGA-A8-A08L;TCGA-A8-A08S;TCGA-A8-A092;TCGA-A8-A094;TCGA-A8-A09I;TCGA-AN-A04D;TCGA-AN-A0AT;TCGA-AN-A0G0;TCGA-AN-A0XR;TCGA-AO-A0J4;TCGA-AO-A0J6;TCGA-AO-A0JM;TCGA-AO-A124;TCGA-AO-A12H;TCGA-AR-A0TX;TCGA-AR-A…	4	4	76649460	76587233
CTBS	GNG5	3	Read_Through	46	TCGA-A1-A0SM;TCGA-A2-A04P;TCGA-A2-A0CM;TCGA-A2-A0D2;TCGA-A2-A0D4;TCGA-A2-A0EY;TCGA-A2-A25B;TCGA-A7-A0CE;TCGA-A7-A13D;TCGA-A7-A26G;TCGA-A8-A075;TCGA-A8-A08S;TCGA-A8-A094;TCGA-A8-A09I;TCGA-A8-A09X;TCGA-AN-A04D;TCGA-AN-A0AT;TCGA-AN-A0G0;TCGA-AO-A0J4;TCGA-AO-A0JM;TCGA-AO-A124;TCGA-AO-A12H;TCGA-AR-A0TX;TCGA-AR-A24Z;TCGA-AR-A256;TCGA-B6-A0RE;TCGA-B6-A0WX;TCGA-BH-A0AV;TCGA-BH-A0BW;TCGA-BH-A0DG;TCGA-BH-A…	1	1	85028940	84967653
RRN3P3	CDR2	3	Read_Through	22	TCGA-A1-A0SM;TCGA-A2-A0D4;TCGA-A2-A0EY;TCGA-A2-A259;TCGA-A7-A0CE;TCGA-A8-A09X;TCGA-AN-A04D;TCGA-AN-A0XR;TCGA-AO-A0J6;TCGA-AO-A0JM;TCGA-AO-A124;TCGA-AR-A24Z;TCGA-BH-A0BW;TCGA-BH-A0DT;TCGA-BH-A0EA;TCGA-BH-A0H6;TCGA-BH-A18U;TCGA-C8-A12Q;TCGA-C8-A130;TCGA-D8-A27F;TCGA-D8-A27H;TCGA-E2-A15K	16	16	22437534	22376335
AK055623/AK311380	MVB12A	3	Read_Through	19	TCGA-A2-A0D2;TCGA-A2-A0EY;TCGA-A7-A0CE;TCGA-A7-A13D;TCGA-A8-A09I;TCGA-A8-A09X;TCGA-AN-A0XR;TCGA-AO-A0J4;TCGA-AO-A0J6;TCGA-AO-A0JM;TCGA-AO-A124;TCGA-AR-A24Z;TCGA-BH-A0BW;TCGA-BH-A0DT;TCGA-BH-A0H6;TCGA-BH-A0WA;TCGA-E2-A109;TCGA-E2-A15K;TCGA-EW-A1PB	19	19	17517105	17531122
BC090059	RIN2	3	Read_Through	17	TCGA-A1-A0SM;TCGA-A2-A0CM;TCGA-A2-A0D1;TCGA-A2-A0YG;TCGA-A2-A259;TCGA-A8-A08S;TCGA-A8-A092;TCGA-AN-A0G0;TCGA-AO-A0J6;TCGA-AO-A124;TCGA-AR-A0TX;TCGA-AR-A24Z;TCGA-BH-A0BW;TCGA-C8-A12Q;TCGA-E2-A109;TCGA-E2-A15K;TCGA-EW-A1P8	20	20	19780391	19870210
GXYLT2	PPP4R2	3	Read_Through	12	TCGA-A1-A0SM;TCGA-A2-A0EY;TCGA-A2-A25B;TCGA-A8-A09I;TCGA-AN-A0XR;TCGA-AO-A0J6;TCGA-AR-A0TX;TCGA-AR-A1AY;TCGA-AR-A24Z;TCGA-BH-A0AV;TCGA-BH-A0EA;TCGA-E2-A152	3	3	73016870	73047228
VPS45	PLEKHO1	3	Read_Through	12	TCGA-A1-A0SM;TCGA-A2-A04T;TCGA-A7-A0CE;TCGA-A7-A26G;TCGA-AN-A04D;TCGA-AO-A0J4;TCGA-AO-A0J6;TCGA-AO-A12H;TCGA-AR-A256;TCGA-BH-A0EA;TCGA-C8-A130;TCGA-EW-A1P8	1	1	150082742	150123102
TPD52L2	DNAJC5	3	Read_Through	11	TCGA-A2-A04T;TCGA-A2-A0CM;TCGA-A2-A0D2;TCGA-A2-A0EY;TCGA-A8-A08L;TCGA-AO-A0J4;TCGA-AR-A0TX;TCGA-BH-A0AV;TCGA-BH-A0DT;TCGA-BH-A0E0;TCGA-BH-A18U	20	20	62505169	62559688
BACH1	GRIK1-AS2	3	Read_Through	11	TCGA-A2-A04P;TCGA-A2-A0D2;TCGA-A2-A0EY;TCGA-AN-A0AT;TCGA-AN-A0G0;TCGA-AO-A0J4;TCGA-AO-A0J6;TCGA-BH-A0AV;TCGA-BH-A0BW;TCGA-BH-A0E0;TCGA-C8-A12L	21	21	30702014	30969890
BC067907	MSN	3	Read_Through	8	TCGA-A2-A04P;TCGA-A2-A0D4;TCGA-A7-A0CE;TCGA-A7-A26G;TCGA-AO-A124;TCGA-BH-A0BW;TCGA-C8-A12L;TCGA-D8-A27F	X	X	64808492	64936680
IGSF5	PCP4	3	Read_Through	8	TCGA-A2-A04P;TCGA-A2-A0EY;TCGA-A8-A08B;TCGA-A8-A08L;TCGA-AO-A0J6;TCGA-BH-A18U;TCGA-C8-A130;TCGA-E2-A1LG	21	21	41165540	41270401
ST20	MTHFS/ST20-MTHFS	3	Read_Through	7	TCGA-A2-A04P;TCGA-A7-A0CE;TCGA-A7-A13D;TCGA-A8-A094;TCGA-A8-A09X;TCGA-AN-A04D;TCGA-BH-A0AV	15	15	80215794	80137784
AK128346	MUC20	3	Read_Through	7	TCGA-A2-A0D4;TCGA-A8-A08B;TCGA-A8-A08L;TCGA-AN-A04D;TCGA-AO-A0J6;TCGA-AR-A1AY;TCGA-BH-A0H6	3	3	195435712	195451551
UBA2	WTIP	3	Read_Through	7	TCGA-A2-A04P;TCGA-AN-A0AT;TCGA-AO-A0J6;TCGA-AR-A0TX;TCGA-BH-A18U;TCGA-E2-A109;TCGA-E2-A14P	19	19	34957919	34981281
KRBOX1	FAM198A	3	Read_Through	6	TCGA-A2-A0D1;TCGA-A8-A08S;TCGA-E2-A152;TCGA-E2-A1LG;TCGA-EW-A1P8;TCGA-EW-A1PB	3	3	42983563	43073759
MTG1	LOC619207	3	Read_Through	6	TCGA-A2-A0EY;TCGA-A2-A259;TCGA-A8-A08S;TCGA-BH-A0H6;TCGA-E2-A109;TCGA-EW-A1J5	10	10	135216277	135269741
SMG1	ARL6IP1	3	Read_Through	6	TCGA-A2-A0CM;TCGA-A2-A0D2;TCGA-AN-A04D;TCGA-BH-A0DG;TCGA-BH-A0H0;TCGA-E2-A14P	16	16	18937272	18806903
LIMS3-LOC440895	MALL	3	Read_Through	5	TCGA-A1-A0SM;TCGA-AO-A0J4;TCGA-B6-A0WX;TCGA-BH-A0DT;TCGA-D8-A27H	2	2	111181238	110849347
AK056584	MLIP	3	Read_Through	5	TCGA-AO-A0J4;TCGA-AO-A0J6;TCGA-BH-A0BW;TCGA-BH-A0E0;TCGA-D8-A27F	6	6	53847648	53986245
NUDT14	JAG2	3	Read_Through	4	TCGA-A8-A08L;TCGA-AO-A0J4;TCGA-AO-A124;TCGA-E2-A14P	14	14	105642871	105624100
DTX2P1-UPK3BP1-PMS2P11	CCDC146	3	Read_Through	4	TCGA-A2-A0D4;TCGA-AN-A0AT;TCGA-AO-A12H;TCGA-BH-A0EA	7	7	76645172	76796975
AX748165	SCGB1B2P	3	Read_Through	4	TCGA-A8-A08L;TCGA-AO-A12H;TCGA-BH-A0BW;TCGA-C8-A130	19	19	35166535	35068361
NAA40	COX8A	3	Read_Through	4	TCGA-A2-A0D1;TCGA-A7-A26G;TCGA-AR-A256;TCGA-BH-A18U	11	11	63721521	63743697
BC044934	HOMER2	3	Read_Through	4	TCGA-A8-A08L;TCGA-A8-A08S;TCGA-AN-A0AT;TCGA-AO-A124	15	15	83654539	83561593
EPS8L2	TALDO1	3	Read_Through	4	TCGA-AO-A0J4;TCGA-AO-A124;TCGA-EW-A1J5;TCGA-EW-A1PB	11	11	726751	755879
SLC25A32	LOC100499183	3	Read_Through	3	TCGA-A2-A04T;TCGA-A8-A08L;TCGA-AO-A0J4	8	8	104427012	104298135
2014-03-02	HNRNPM	3	Read_Through	2	TCGA-AN-A0AT;TCGA-EW-A1J5	19	19	8495751	8520289
KLRG2	LOC100129148	3	Read_Through	2	TCGA-AR-A0TX;TCGA-AR-A256	7	7	139164373	139108131
CTSC	RAB38	3	Read_Through	2	TCGA-AO-A0J6;TCGA-BH-A18U	11	11	88033698	87883123
SRP9	EPHX1	3	Read_Through	2	TCGA-BH-A18R;TCGA-EW-A1PB	1	1	225971070	226016426
PIBF1	KLF5	3	Read_Through	2	TCGA-BH-A0DT;TCGA-E2-A1LG	13	13	73573133	73635999
CUL4A	TFDP1	3	Read_Through	1	TCGA-AN-A0AT	13	13	113915073	114265311
DEGS1	CNIH4	3	Read_Through	1	TCGA-AO-A124	1	1	224371120	224558985
TMEM56/TMEM56-RWDD3	RWDD3	3	Read_Through	1	TCGA-AN-A04D	1	1	95639445	95712312
C8orf87	TRIQK	3	Read_Through	1	TCGA-C8-A12Q	8	8	94146973	93966792
PVRL4	F11R	3	Read_Through	1	TCGA-AN-A0AT	1	1	161059008	160971143
CDC34	GZMM	3	Read_Through	1	TCGA-EW-A1J5	19	19	537147	547280
ACTL6A	NDUFB5	3	Read_Through	1	TCGA-E2-A14P	3	3	179301236	179332740
A4GALT	CYB5R3	3	Read_Through	1	TCGA-A1-A0SM	22	22	43116803	43032852
GAL3ST2	NEU4	3	Read_Through	1	TCGA-E2-A14P	2	2	242738569	242755679
MLYCD	OSGIN1	3	Read_Through	1	TCGA-A2-A0EY	16	16	83945972	83991245
SLC35G2	NCK1	3	Read_Through	1	TCGA-AN-A0AT	3	3	136538470	136646826
AZGP1	GJC3	3	Read_Through	51	TCGA-A1-A0SM;TCGA-A2-A04P;TCGA-A2-A0CM;TCGA-A2-A0D4;TCGA-A2-A0EY;TCGA-A2-A0YG;TCGA-A2-A259;TCGA-A2-A25B;TCGA-A7-A0CE;TCGA-A7-A13D;TCGA-A8-A075;TCGA-A8-A07B;TCGA-A8-A08S;TCGA-A8-A092;TCGA-A8-A094;TCGA-A8-A09I;TCGA-A8-A09X;TCGA-AN-A04D;TCGA-AN-A0G0;TCGA-AN-A0XR;TCGA-AO-A0J4;TCGA-AO-A0J6;TCGA-AO-A0JM;TCGA-AO-A124;TCGA-AO-A12H;TCGA-AR-A0TX;TCGA-AR-A1AY;TCGA-AR-A24Z;TCGA-B6-A0RE;TCGA-B6-A0WX;TCGA-BH-A…	7	7	99569369	99521226
ERV3-1	ZNF117	3	Read_Through	39	TCGA-A1-A0SM;TCGA-A2-A04T;TCGA-A2-A0CM;TCGA-A2-A0EY;TCGA-A2-A259;TCGA-A7-A0CE;TCGA-A7-A26G;TCGA-A8-A075;TCGA-A8-A08L;TCGA-A8-A092;TCGA-A8-A094;TCGA-AN-A04D;TCGA-AN-A0AT;TCGA-AN-A0G0;TCGA-AN-A0XR;TCGA-AO-A0J4;TCGA-AO-A0J6;TCGA-AO-A124;TCGA-AO-A12H;TCGA-AR-A0TX;TCGA-AR-A24Z;TCGA-AR-A256;TCGA-B6-A0WX;TCGA-BH-A0DT;TCGA-BH-A0E0;TCGA-BH-A0EA;TCGA-BH-A0H0;TCGA-BH-A0H6;TCGA-BH-A0WA;TCGA-BH-A18U;TCGA-C8-A…	7	7	64466919	64442494
AF086285	ATP6V1E2	3	Read_Through	31	TCGA-A2-A04T;TCGA-A2-A0CM;TCGA-A2-A0D1;TCGA-A2-A0D2;TCGA-A2-A0EY;TCGA-A2-A0YG;TCGA-A7-A13D;TCGA-A8-A08L;TCGA-AN-A04D;TCGA-AN-A0AT;TCGA-AN-A0G0;TCGA-AO-A0J4;TCGA-AO-A0J6;TCGA-AO-A124;TCGA-AR-A256;TCGA-B6-A0WX;TCGA-BH-A0AV;TCGA-BH-A0BW;TCGA-BH-A0DT;TCGA-BH-A0EA;TCGA-BH-A0H0;TCGA-BH-A0WA;TCGA-BH-A18U;TCGA-C8-A12L;TCGA-C8-A130;TCGA-D8-A27F;TCGA-E2-A109;TCGA-E2-A14P;TCGA-E2-A1LG;TCGA-EW-A1J5;TCGA-EW-A…	2	2	46762952	46739951
SLC39A1	CRTC2	3	Read_Through	30	TCGA-A2-A0YG;TCGA-A7-A0CE;TCGA-A7-A13D;TCGA-A7-A26G;TCGA-A8-A075;TCGA-A8-A08L;TCGA-A8-A094;TCGA-A8-A09X;TCGA-AN-A04D;TCGA-AN-A0AT;TCGA-AN-A0G0;TCGA-AO-A0J4;TCGA-AO-A0J6;TCGA-AO-A0JM;TCGA-AO-A124;TCGA-AR-A1AY;TCGA-AR-A256;TCGA-B6-A0RE;TCGA-B6-A0WX;TCGA-BH-A0BW;TCGA-BH-A0DG;TCGA-BH-A0DT;TCGA-BH-A0H0;TCGA-BH-A0WA;TCGA-BH-A18R;TCGA-C8-A12Q;TCGA-D8-A27F;TCGA-D8-A27H;TCGA-E2-A109;TCGA-E2-A1LG	1	1	153934696	153927642
POLA2	CDC42EP2	3	Read_Through	23	TCGA-A1-A0SM;TCGA-A2-A04P;TCGA-A2-A04T;TCGA-A2-A0CM;TCGA-A2-A0D1;TCGA-A2-A0D2;TCGA-A2-A0EY;TCGA-A7-A0CE;TCGA-A7-A13D;TCGA-A8-A08L;TCGA-A8-A08S;TCGA-A8-A09I;TCGA-AN-A0XR;TCGA-AO-A0J4;TCGA-AR-A1AY;TCGA-AR-A24Z;TCGA-BH-A0EA;TCGA-BH-A18U;TCGA-D8-A27F;TCGA-E2-A109;TCGA-E2-A15K;TCGA-EW-A1P8;TCGA-EW-A1PB	11	11	65063461	65088015
CLN6	CALML4	3	Read_Through	23	TCGA-A2-A04T;TCGA-A2-A0CM;TCGA-A2-A0D2;TCGA-A7-A0CE;TCGA-A7-A26G;TCGA-A8-A075;TCGA-A8-A092;TCGA-AN-A04D;TCGA-AN-A0AT;TCGA-AO-A0J4;TCGA-AO-A0J6;TCGA-AO-A0JM;TCGA-AO-A124;TCGA-AR-A24Z;TCGA-AR-A256;TCGA-BH-A0BW;TCGA-BH-A0H6;TCGA-BH-A0WA;TCGA-BH-A18R;TCGA-BH-A18U;TCGA-C8-A130;TCGA-D8-A27F;TCGA-EW-A1PB	15	15	68510874	68489966
ZNF782	ZNF510	3	Read_Through	21	TCGA-A1-A0SM;TCGA-A2-A04T;TCGA-A2-A0D1;TCGA-A2-A0EY;TCGA-A2-A259;TCGA-A2-A25B;TCGA-A7-A13D;TCGA-A7-A26G;TCGA-A8-A08L;TCGA-A8-A08S;TCGA-AO-A0J4;TCGA-AO-A0J6;TCGA-AO-A0JM;TCGA-AO-A12H;TCGA-AR-A0TX;TCGA-BH-A0BW;TCGA-BH-A0DG;TCGA-BH-A0DT;TCGA-BH-A0H0;TCGA-BH-A18U;TCGA-EW-A1J5	9	9	99589362	99538527
SHFM1	LOC100506136	3	Read_Through	19	TCGA-A2-A04P;TCGA-A2-A0D1;TCGA-A2-A0EY;TCGA-A7-A0CE;TCGA-A7-A26G;TCGA-A8-A08L;TCGA-AN-A0AT;TCGA-AN-A0XR;TCGA-AO-A0J4;TCGA-AO-A0J6;TCGA-AO-A124;TCGA-AR-A256;TCGA-B6-A0WX;TCGA-BH-A0BW;TCGA-C8-A130;TCGA-D8-A27F;TCGA-D8-A27H;TCGA-E2-A14P;TCGA-EW-A1P8	7	7	96324110	96275248
BC035340	MCF2L	3	Read_Through	18	TCGA-A2-A04T;TCGA-A2-A0D4;TCGA-A2-A0EY;TCGA-A2-A0YG;TCGA-A2-A25B;TCGA-A7-A0CE;TCGA-A8-A075;TCGA-A8-A08L;TCGA-A8-A09I;TCGA-A8-A09X;TCGA-AO-A12H;TCGA-AR-A0TX;TCGA-AR-A1AY;TCGA-AR-A24Z;TCGA-BH-A0AV;TCGA-BH-A0BW;TCGA-C8-A130;TCGA-E2-A152	13	13	113556685	113669077
VAX2	ATP6V1B1	3	Read_Through	17	TCGA-A1-A0SM;TCGA-A2-A04P;TCGA-A2-A04T;TCGA-A2-A0D2;TCGA-A7-A0CE;TCGA-AN-A04D;TCGA-AN-A0AT;TCGA-AN-A0G0;TCGA-AO-A0J4;TCGA-AO-A0J6;TCGA-AO-A124;TCGA-B6-A0RE;TCGA-BH-A0H6;TCGA-BH-A0WA;TCGA-C8-A12Q;TCGA-D8-A27F;TCGA-E2-A152	2	2	71148415	71185176
SLC29A1	HSP90AB1	3	Read_Through	17	TCGA-A2-A0EY;TCGA-A2-A259;TCGA-A8-A08L;TCGA-A8-A092;TCGA-A8-A09I;TCGA-AO-A0J4;TCGA-AO-A124;TCGA-AR-A0TX;TCGA-AR-A256;TCGA-BH-A0AV;TCGA-BH-A0BW;TCGA-BH-A0E0;TCGA-BH-A0H0;TCGA-D8-A27F;TCGA-E2-A109;TCGA-E2-A15K;TCGA-EW-A1J5	6	6	44200165	44216367
TMSB15B	H2BFXP	3	Read_Through	15	TCGA-A1-A0SM;TCGA-A2-A04T;TCGA-A2-A0D1;TCGA-A2-A0D2;TCGA-A7-A0CE;TCGA-A8-A08L;TCGA-AN-A04D;TCGA-AN-A0AT;TCGA-AO-A0J4;TCGA-AO-A0J6;TCGA-BH-A0AV;TCGA-BH-A0WA;TCGA-C8-A12L;TCGA-D8-A27F;TCGA-D8-A27H	X	X	103219195	103316701
AK056686	HMGN2P46	3	Read_Through	13	TCGA-A2-A0D4;TCGA-A8-A08S;TCGA-A8-A094;TCGA-A8-A09I;TCGA-AO-A0JM;TCGA-AO-A12H;TCGA-AR-A24Z;TCGA-AR-A256;TCGA-BH-A0DG;TCGA-BH-A0DT;TCGA-BH-A0H0;TCGA-BH-A18U;TCGA-E2-A15K	15	15	45768750	45805896
WRB	SH3BGR	3	Read_Through	13	TCGA-A2-A0D1;TCGA-A2-A0D2;TCGA-AN-A04D;TCGA-AO-A0J6;TCGA-AO-A124;TCGA-AR-A24Z;TCGA-BH-A0BW;TCGA-BH-A0E0;TCGA-BH-A0WA;TCGA-BH-A18U;TCGA-C8-A130;TCGA-D8-A27H;TCGA-E2-A1LG	21	21	40763762	40834301
ZNF655	LOC100289187	3	Read_Through	12	TCGA-A1-A0SM;TCGA-A2-A0EY;TCGA-A8-A08S;TCGA-A8-A09I;TCGA-AN-A0AT;TCGA-AR-A0TX;TCGA-BH-A0DT;TCGA-BH-A0EA;TCGA-BH-A0H6;TCGA-BH-A18R;TCGA-C8-A130;TCGA-D8-A27F	7	7	99169415	99197828
PEX26	TUBA8	3	Read_Through	12	TCGA-A2-A0D2;TCGA-A8-A09I;TCGA-AN-A0G0;TCGA-AN-A0XR;TCGA-AR-A1AY;TCGA-AR-A24Z;TCGA-AR-A256;TCGA-C8-A130;TCGA-D8-A27H;TCGA-E2-A109;TCGA-E2-A152;TCGA-EW-A1PB	22	22	18562780	18604246
CLDND2	ETFB	3	Read_Through	11	TCGA-A7-A0CE;TCGA-A7-A13D;TCGA-AN-A0AT;TCGA-AO-A0J4;TCGA-AR-A1AY;TCGA-B6-A0RE;TCGA-BH-A0AV;TCGA-BH-A0H0;TCGA-BH-A18R;TCGA-EW-A1P8;TCGA-EW-A1PB	19	19	51871140	51857562
AK096249	LOC100506599	3	Read_Through	10	TCGA-A2-A0EY;TCGA-A2-A0YG;TCGA-A8-A08L;TCGA-A8-A094;TCGA-AN-A0AT;TCGA-AO-A12H;TCGA-AR-A0TX;TCGA-BH-A0H0;TCGA-E2-A1LG;TCGA-EW-A1J5	9	9	138372519	138360555
TOPORS	DDX58	3	Read_Through	10	TCGA-A1-A0SM;TCGA-A2-A04T;TCGA-A2-A0EY;TCGA-A2-A0YG;TCGA-A7-A0CE;TCGA-AO-A124;TCGA-BH-A0H6;TCGA-C8-A12Q;TCGA-D8-A27F;TCGA-EW-A1J5	9	9	32550772	32500937
SUMO2	HN1	3	Read_Through	9	TCGA-A2-A0D1;TCGA-A2-A0D4;TCGA-A2-A0YG;TCGA-A8-A08L;TCGA-AN-A04D;TCGA-AN-A0AT;TCGA-AO-A0J6;TCGA-BH-A0DG;TCGA-E2-A14P	17	17	73178909	73144766
RPL11	TCEB3	3	Read_Through	9	TCGA-A7-A26G;TCGA-AO-A0J4;TCGA-AO-A0J6;TCGA-AR-A0TX;TCGA-BH-A0AV;TCGA-BH-A18U;TCGA-E2-A152;TCGA-E2-A15K;TCGA-EW-A1J5	1	1	24021281	24075511
HDAC8	CITED1	3	Read_Through	8	TCGA-A2-A0EY;TCGA-AN-A04D;TCGA-AO-A0J4;TCGA-AO-A0J6;TCGA-AR-A256;TCGA-B6-A0WX;TCGA-BH-A0E0;TCGA-C8-A130	X	X	71571583	71522784
SMIM8	C6orf164	3	Read_Through	6	TCGA-A2-A0D1;TCGA-A2-A0EY;TCGA-A7-A26G;TCGA-AO-A124;TCGA-AR-A24Z;TCGA-AR-A256	6	6	88085428	88102443
VPS72	TMOD4	3	Read_Through	6	TCGA-A2-A0YG;TCGA-A7-A0CE;TCGA-AN-A0G0;TCGA-AR-A256;TCGA-B6-A0RE;TCGA-EW-A1P8	1	1	151150477	151143535
RAD18	OXTR	3	Read_Through	6	TCGA-A1-A0SM;TCGA-A2-A04T;TCGA-A8-A08L;TCGA-BH-A18U;TCGA-C8-A12Q;TCGA-E2-A1LG	3	3	8932073	8794910
AK097803	AK000470	3	Read_Through	5	TCGA-A2-A04P;TCGA-A2-A04T;TCGA-A2-A0D1;TCGA-A2-A0EY;TCGA-A8-A08S	X	X	3784991	3772968
TTLL4	CYP27A1	3	Read_Through	5	TCGA-A2-A0D4;TCGA-AO-A0J6;TCGA-AO-A124;TCGA-AR-A256;TCGA-E2-A109	2	2	219617908	219674300
PWP2	C21orf33	3	Read_Through	5	TCGA-A2-A0EY;TCGA-A7-A13D;TCGA-A8-A09I;TCGA-AR-A256;TCGA-BH-A0H0	21	21	45548507	45555942
LOC728606	KCTD1	3	Read_Through	4	TCGA-A8-A07B;TCGA-AR-A24Z;TCGA-C8-A12Q;TCGA-E2-A15K	18	18	24283356	24081214
KLK8/KLK9	KLK7	3	Read_Through	4	TCGA-A7-A13D;TCGA-AO-A0J4;TCGA-AR-A256;TCGA-EW-A1P8	19	19	51504354	51485170
SDHAF2	PPP1R32	3	Read_Through	4	TCGA-A2-A0D1;TCGA-A8-A08L;TCGA-AR-A256;TCGA-BH-A18U	11	11	61205585	61252160
ZNF841	ZNF432	3	Read_Through	4	TCGA-A2-A0EY;TCGA-A8-A075;TCGA-AR-A24Z;TCGA-AR-A256	19	19	52598828	52550313
PFKFB3	LOC399715	3	Read_Through	4	TCGA-A8-A08S;TCGA-A8-A09X;TCGA-AN-A0XR;TCGA-EW-A1P8	10	10	6268328	6368509
MLLT6	CISD3	3	Read_Through	4	TCGA-A7-A0CE;TCGA-A8-A08L;TCGA-A8-A08S;TCGA-AN-A04D	17	17	36881229	36887013
NCK1	IL20RB	3	Read_Through	4	TCGA-AO-A0J4;TCGA-BH-A0BW;TCGA-E2-A1LG;TCGA-EW-A1PB	3	3	136665137	136708283
NSUN4	FAAH	3	Read_Through	3	TCGA-AN-A04D;TCGA-AO-A124;TCGA-AR-A24Z	1	1	46826500	46867763
ZNF91	BC038574	3	Read_Through	3	TCGA-A2-A25B;TCGA-A8-A09I;TCGA-C8-A12L	19	19	23556544	23521856
HOXC10	FLJ12825	3	Read_Through	3	TCGA-A8-A07B;TCGA-A8-A094;TCGA-AR-A24Z	12	12	54379794	54512388
PPP2CA	SKP1	3	Read_Through	3	TCGA-A1-A0SM;TCGA-A8-A075;TCGA-AN-A0AT	5	5	133561451	133509713
FLJ31662	BC067883	3	Read_Through	3	TCGA-AO-A0J6;TCGA-AR-A1AY;TCGA-AR-A256	1	1	95940930	95979707
SMDT1	NDUFA6-AS1	3	Read_Through	3	TCGA-A1-A0SM;TCGA-AN-A0AT;TCGA-AO-A0J6	22	22	42478069	42520052
FAM117A	SLC35B1	3	Read_Through	3	TCGA-A2-A0CM;TCGA-AO-A0J4;TCGA-AO-A0J6	17	17	47793527	47784430
LINC00662	AK094188	3	Read_Through	2	TCGA-A1-A0SM;TCGA-A7-A13D	19	19	28283908	28223875
KLK4	KLKP1	3	Read_Through	2	TCGA-A7-A26G;TCGA-E2-A152	19	19	51411835	51391130
FARSA	SYCE2	3	Read_Through	2	TCGA-AR-A24Z;TCGA-E2-A1LG	19	19	13034965	13015480
VTCN1	TRIM45	3	Read_Through	2	TCGA-AO-A0J6;TCGA-AR-A24Z	1	1	117695713	117659367
LARP1	CNOT8	3	Read_Through	2	TCGA-A2-A0D4;TCGA-AR-A256	5	5	154191200	154244752
PFKP	PITRM1-AS1	3	Read_Through	2	TCGA-AR-A256;TCGA-BH-A0AV	10	10	3178030	3186048
ACTR3	LOC440900	3	Read_Through	2	TCGA-AN-A0AT;TCGA-AR-A0TX	2	2	114713283	114764596
SPSB4	ACPL2	3	Read_Through	2	TCGA-A8-A08L;TCGA-AO-A124	3	3	140785640	140978965
LMAN2	MXD3	3	Read_Through	2	TCGA-A2-A04T;TCGA-BH-A0WA	5	5	176761285	176738485
NXN	GLOD4	3	Read_Through	2	TCGA-BH-A0WA;TCGA-E2-A14P	17	17	706922	681984
ZNF71	SMIM17	3	Read_Through	2	TCGA-A8-A08L;TCGA-BH-A0WA	19	19	57112959	57156936
IKBKB	POLB	3	Read_Through	1	TCGA-A2-A0D1	8	8	42186732	42202471
PRR11	SMG8	3	Read_Through	1	TCGA-A2-A0YG	17	17	57275150	57289702
LARS2	LIMD1	3	Read_Through	1	TCGA-BH-A18R	3	3	45565600	45677642
KLK8/KLK9	KLK7	3	Read_Through	1	TCGA-AO-A124	19	19	51504354	51485170
LOC100132832	CCDC146	3	Read_Through	1	TCGA-BH-A0EA	7	7	76673095	76796975
LHX6	NDUFA8	3	Read_Through	1	TCGA-AR-A256	9	9	124975885	124914687
UAP1	DDR2	3	Read_Through	1	TCGA-AR-A256	1	1	162567648	162625001
THOP1	ZNF554	3	Read_Through	1	TCGA-AO-A124	19	19	2811732	2823038
AX747598	BC071667	3	Read_Through	1	TCGA-AN-A0G0	16	16	90203008	90281090
OTUD6B	LRRC69	3	Read_Through	1	TCGA-E2-A1LG	8	8	92096342	92136721
TCTEX1D2	PCYT1A	3	Read_Through	1	TCGA-AR-A24Z	3	3	196033814	195997412
BC038729	CARD11	3	Read_Through	1	TCGA-A1-A0SM	7	7	3197771	2998265
STX12	PPP1R8	3	Read_Through	1	TCGA-C8-A12Q	1	1	28146243	28159267
SFPQ	AL831889/BX537811	3	Read_Through	56	TCGA-A1-A0SM;TCGA-A2-A04P;TCGA-A2-A04T;TCGA-A2-A0CM;TCGA-A2-A0D1;TCGA-A2-A0D2;TCGA-A2-A0D4;TCGA-A2-A0EY;TCGA-A2-A0YG;TCGA-A2-A259;TCGA-A2-A25B;TCGA-A7-A0CE;TCGA-A7-A13D;TCGA-A7-A26G;TCGA-A8-A075;TCGA-A8-A08L;TCGA-A8-A08S;TCGA-A8-A092;TCGA-A8-A094;TCGA-A8-A09I;TCGA-AN-A04D;TCGA-AN-A0AT;TCGA-AN-A0G0;TCGA-AN-A0XR;TCGA-AO-A0J4;TCGA-AO-A124;TCGA-AO-A12H;TCGA-AR-A0TX;TCGA-AR-A1AY;TCGA-AR-A24Z;TCGA-AR-A…	1	1	NA	NA
SPINT2	C19orf33	3	Read_Through	43	TCGA-A1-A0SM;TCGA-A2-A04P;TCGA-A2-A04T;TCGA-A2-A0CM;TCGA-A2-A0D2;TCGA-A2-A0D4;TCGA-A2-A0EY;TCGA-A2-A0YG;TCGA-A7-A0CE;TCGA-A7-A13D;TCGA-A7-A26G;TCGA-A8-A075;TCGA-A8-A08B;TCGA-A8-A08L;TCGA-A8-A08S;TCGA-A8-A092;TCGA-A8-A094;TCGA-A8-A09X;TCGA-AN-A04D;TCGA-AN-A0AT;TCGA-AN-A0G0;TCGA-AN-A0XR;TCGA-AO-A0J4;TCGA-AO-A0J6;TCGA-AO-A0JM;TCGA-AO-A12H;TCGA-AR-A0TX;TCGA-AR-A1AY;TCGA-AR-A24Z;TCGA-B6-A0WX;TCGA-BH-A…	19	19	38781215	38795015
SIDT2	TAGLN	3	Read_Through	32	TCGA-A2-A04P;TCGA-A2-A0D1;TCGA-A2-A0D2;TCGA-A2-A0EY;TCGA-A2-A259;TCGA-A7-A26G;TCGA-A8-A075;TCGA-A8-A08L;TCGA-A8-A092;TCGA-A8-A094;TCGA-A8-A09I;TCGA-AN-A04D;TCGA-AN-A0G0;TCGA-AO-A0J4;TCGA-AO-A0JM;TCGA-AO-A12H;TCGA-AR-A0TX;TCGA-AR-A256;TCGA-BH-A0AV;TCGA-BH-A0BW;TCGA-BH-A0DG;TCGA-BH-A0H0;TCGA-BH-A0H6;TCGA-BH-A18U;TCGA-C8-A12L;TCGA-C8-A130;TCGA-D8-A27F;TCGA-E2-A109;TCGA-E2-A152;TCGA-EW-A1J5;TCGA-EW-A…	11	11	117066631	117073718
PPCS	CCDC30	3	Read_Through	26	TCGA-A1-A0SM;TCGA-A2-A04P;TCGA-A2-A04T;TCGA-A2-A0D1;TCGA-A2-A25B;TCGA-A8-A08B;TCGA-A8-A092;TCGA-A8-A09X;TCGA-AN-A0AT;TCGA-AN-A0G0;TCGA-AN-A0XR;TCGA-AR-A0TX;TCGA-AR-A24Z;TCGA-B6-A0RE;TCGA-BH-A0AV;TCGA-BH-A0DG;TCGA-BH-A0DT;TCGA-BH-A0H0;TCGA-BH-A18U;TCGA-C8-A12L;TCGA-D8-A27F;TCGA-D8-A27H;TCGA-E2-A109;TCGA-E2-A14P;TCGA-EW-A1J5;TCGA-EW-A1PB	1	1	42923021	42948334
SLC35A3	HIAT1	3	Read_Through	24	TCGA-A2-A0CM;TCGA-A2-A0D2;TCGA-A2-A0YG;TCGA-A2-A259;TCGA-A2-A25B;TCGA-A7-A0CE;TCGA-A7-A26G;TCGA-A8-A08L;TCGA-A8-A08S;TCGA-AN-A0AT;TCGA-AN-A0G0;TCGA-AO-A0J4;TCGA-AO-A0JM;TCGA-AO-A124;TCGA-AR-A256;TCGA-BH-A0DT;TCGA-BH-A0H0;TCGA-BH-A18U;TCGA-C8-A12L;TCGA-C8-A12Q;TCGA-D8-A27F;TCGA-D8-A27H;TCGA-E2-A109;TCGA-EW-A1J5	1	1	100483371	100515465
LOC389765	AK124523	3	Read_Through	23	TCGA-A2-A04P;TCGA-A2-A04T;TCGA-A2-A0D1;TCGA-A2-A0D2;TCGA-A2-A259;TCGA-A2-A25B;TCGA-A8-A08L;TCGA-AN-A04D;TCGA-AN-A0AT;TCGA-AN-A0XR;TCGA-AO-A0J4;TCGA-AO-A0J6;TCGA-AO-A124;TCGA-AO-A12H;TCGA-AR-A24Z;TCGA-BH-A0BW;TCGA-BH-A0DT;TCGA-BH-A0EA;TCGA-BH-A18U;TCGA-C8-A12Q;TCGA-D8-A27H;TCGA-E2-A109;TCGA-EW-A1J5	9	9	NA	NA
GOLT1A	KISS1	3	Read_Through	18	TCGA-A1-A0SM;TCGA-A2-A04P;TCGA-A7-A0CE;TCGA-A8-A075;TCGA-AN-A04D;TCGA-AN-A0AT;TCGA-AN-A0G0;TCGA-AO-A0J6;TCGA-AO-A12H;TCGA-AR-A1AY;TCGA-B6-A0RE;TCGA-BH-A0EA;TCGA-BH-A0H6;TCGA-C8-A12Q;TCGA-C8-A130;TCGA-D8-A27F;TCGA-D8-A27H;TCGA-EW-A1PB	1	1	204183010	204162042
STX16	NPEPL1	3	Read_Through	17	TCGA-A2-A04P;TCGA-A2-A0CM;TCGA-A2-A0EY;TCGA-A2-A259;TCGA-A8-A08L;TCGA-AN-A04D;TCGA-AN-A0XR;TCGA-AO-A124;TCGA-AR-A0TX;TCGA-AR-A24Z;TCGA-BH-A0E0;TCGA-BH-A18U;TCGA-E2-A109;TCGA-E2-A14P;TCGA-E2-A152;TCGA-E2-A1LG;TCGA-EW-A1J5	20	20	57248767	57266780
CHCHD10	VPREB3	3	Read_Through	15	TCGA-A2-A0D1;TCGA-A2-A0D4;TCGA-A7-A0CE;TCGA-A8-A08L;TCGA-AN-A0AT;TCGA-AO-A0J4;TCGA-AO-A124;TCGA-AR-A256;TCGA-B6-A0WX;TCGA-BH-A0E0;TCGA-BH-A0WA;TCGA-BH-A18R;TCGA-E2-A1LG;TCGA-EW-A1P8;TCGA-EW-A1PB	22	22	24108315	24095385
HARS2	ZMAT2	3	Read_Through	15	TCGA-A1-A0SM;TCGA-A2-A0D1;TCGA-A2-A259;TCGA-A8-A075;TCGA-AN-A0G0;TCGA-AO-A0J6;TCGA-AO-A12H;TCGA-AR-A0TX;TCGA-AR-A256;TCGA-B6-A0RE;TCGA-BH-A0DG;TCGA-BH-A0DT;TCGA-BH-A0WA;TCGA-E2-A14P;TCGA-E2-A152	5	5	140077663	140080404
SLC2A11	MIF	3	Read_Through	15	TCGA-A2-A04P;TCGA-A2-A04T;TCGA-A8-A08L;TCGA-AN-A04D;TCGA-AO-A0J4;TCGA-AO-A124;TCGA-AR-A1AY;TCGA-B6-A0RE;TCGA-C8-A12L;TCGA-D8-A27F;TCGA-E2-A109;TCGA-E2-A14P;TCGA-E2-A1LG;TCGA-EW-A1P8;TCGA-EW-A1PB	22	22	24225056	24236959
ARL6IP1	RPS15A	3	Read_Through	15	TCGA-A2-A0CM;TCGA-A2-A0D1;TCGA-A2-A0D4;TCGA-A2-A25B;TCGA-A8-A075;TCGA-A8-A08S;TCGA-A8-A094;TCGA-AN-A04D;TCGA-AO-A0J4;TCGA-AR-A0TX;TCGA-AR-A24Z;TCGA-B6-A0RE;TCGA-BH-A0WA;TCGA-E2-A152;TCGA-E2-A1LG	16	16	18805921	18800440
ZNF343	SNRPB	3	Read_Through	15	TCGA-A1-A0SM;TCGA-A2-A04P;TCGA-A2-A0D1;TCGA-A2-A0EY;TCGA-A7-A26G;TCGA-A8-A08S;TCGA-A8-A092;TCGA-A8-A09I;TCGA-AN-A04D;TCGA-AN-A0G0;TCGA-AO-A0J6;TCGA-AO-A124;TCGA-BH-A0H0;TCGA-BH-A0H6;TCGA-BH-A18R	20	20	2473345	2448404
CDR2L	ICT1	3	Read_Through	14	TCGA-A1-A0SM;TCGA-A2-A0D1;TCGA-A2-A0D4;TCGA-A8-A08L;TCGA-A8-A094;TCGA-AN-A04D;TCGA-AN-A0AT;TCGA-AO-A0J4;TCGA-AO-A0JM;TCGA-AR-A0TX;TCGA-AR-A1AY;TCGA-BH-A0DG;TCGA-E2-A14P;TCGA-E2-A15K	17	17	72998323	73013173
MFGE8	HAPLN3	3	Read_Through	13	TCGA-A2-A04P;TCGA-A7-A0CE;TCGA-A8-A08S;TCGA-AN-A04D;TCGA-AN-A0G0;TCGA-AO-A0J4;TCGA-AO-A0J6;TCGA-AO-A124;TCGA-AR-A256;TCGA-BH-A0AV;TCGA-BH-A0WA;TCGA-D8-A27F;TCGA-EW-A1P8	15	15	89444782	89430576
PELI3	DPP3	3	Read_Through	13	TCGA-A2-A04P;TCGA-A2-A0D2;TCGA-A7-A13D;TCGA-A8-A08L;TCGA-AN-A0AT;TCGA-AO-A0J6;TCGA-AO-A124;TCGA-AO-A12H;TCGA-B6-A0RE;TCGA-BH-A0DG;TCGA-D8-A27H;TCGA-E2-A14P;TCGA-EW-A1PB	11	11	NA	NA
AK309744	FAM183A	3	Read_Through	13	TCGA-A2-A0D4;TCGA-A2-A25B;TCGA-A7-A13D;TCGA-A7-A26G;TCGA-AN-A0G0;TCGA-AN-A0XR;TCGA-AR-A0TX;TCGA-AR-A256;TCGA-BH-A0BW;TCGA-BH-A0H0;TCGA-BH-A18U;TCGA-E2-A109;TCGA-EW-A1J5	1	1	43610968	43616432
MBD1	CCDC11	3	Read_Through	11	TCGA-A2-A0D1;TCGA-A2-A0D4;TCGA-A8-A075;TCGA-A8-A08S;TCGA-AO-A124;TCGA-BH-A0H0;TCGA-BH-A0H6;TCGA-C8-A12Q;TCGA-E2-A109;TCGA-E2-A15K;TCGA-E2-A1LG	18	18	47799047	47788589
PRIM1	NACA	3	Read_Through	11	TCGA-A2-A0CM;TCGA-A2-A0EY;TCGA-A8-A08L;TCGA-AN-A04D;TCGA-AO-A0J6;TCGA-AO-A124;TCGA-AR-A1AY;TCGA-AR-A24Z;TCGA-BH-A18U;TCGA-E2-A109;TCGA-E2-A1LG	12	12	57127931	57108471
MRPS10	GUCA1B	3	Read_Through	11	TCGA-A1-A0SM;TCGA-A2-A0D1;TCGA-A7-A0CE;TCGA-A8-A07B;TCGA-A8-A08S;TCGA-A8-A094;TCGA-AO-A0J6;TCGA-AR-A0TX;TCGA-BH-A0H6;TCGA-E2-A109;TCGA-E2-A15K	6	6	42176596	42156469
GCSH	C16orf46	3	Read_Through	11	TCGA-A2-A04T;TCGA-A2-A0D1;TCGA-A2-A0D4;TCGA-AO-A0J4;TCGA-AO-A0J6;TCGA-AR-A24Z;TCGA-BH-A0AV;TCGA-BH-A0EA;TCGA-E2-A109;TCGA-E2-A152;TCGA-E2-A1LG	16	16	81118068	81087699
TMEM141	KIAA1984	3	Read_Through	11	TCGA-A2-A04T;TCGA-A2-A25B;TCGA-A7-A0CE;TCGA-A8-A075;TCGA-A8-A08L;TCGA-AO-A0J4;TCGA-AO-A124;TCGA-BH-A0BW;TCGA-BH-A0DT;TCGA-BH-A0H0;TCGA-EW-A1J5	9	9	139686810	139693554
LOC100134368	NME4	3	Read_Through	10	TCGA-A2-A04T;TCGA-A8-A075;TCGA-A8-A08S;TCGA-AO-A0J4;TCGA-AR-A24Z;TCGA-BH-A0BW;TCGA-BH-A18U;TCGA-D8-A27H;TCGA-E2-A109;TCGA-EW-A1J5	16	16	433429	448990
LOC728613	SDHAP3	3	Read_Through	10	TCGA-A2-A0D2;TCGA-A2-A0D4;TCGA-A2-A259;TCGA-A8-A08S;TCGA-A8-A094;TCGA-AR-A0TX;TCGA-AR-A24Z;TCGA-BH-A0DT;TCGA-E2-A109;TCGA-EW-A1J5	5	5	1599742	1593399
MFSD7	ATP5I	3	Read_Through	10	TCGA-A2-A04T;TCGA-A2-A0D1;TCGA-A8-A08L;TCGA-A8-A08S;TCGA-AN-A0AT;TCGA-AO-A0J4;TCGA-C8-A12L;TCGA-C8-A12Q;TCGA-E2-A15K;TCGA-EW-A1J5	4	4	679878	667190
SCNN1A	TNFRSF1A	3	Read_Through	9	TCGA-A1-A0SM;TCGA-A2-A0EY;TCGA-A7-A0CE;TCGA-A8-A092;TCGA-AO-A0J4;TCGA-AR-A24Z;TCGA-C8-A12L;TCGA-C8-A12Q;TCGA-E2-A1LG	12	12	6457893	6443410
METTL21B	TSFM	3	Read_Through	9	TCGA-A2-A04T;TCGA-A2-A0CM;TCGA-A2-A0D2;TCGA-A7-A0CE;TCGA-A8-A075;TCGA-AR-A0TX;TCGA-E2-A15K;TCGA-EW-A1J5;TCGA-EW-A1PB	12	12	58166911	58176893
TSC22D4	C7orf61	3	Read_Through	9	TCGA-A2-A04T;TCGA-A2-A0D2;TCGA-AO-A0J4;TCGA-AR-A0TX;TCGA-B6-A0RE;TCGA-BH-A0AV;TCGA-BH-A0BW;TCGA-BH-A0E0;TCGA-BH-A0WA	7	7	100065175	100061309
CADM4	ZNF428	3	Read_Through	9	TCGA-A2-A04P;TCGA-A2-A04T;TCGA-A2-A0EY;TCGA-A8-A07B;TCGA-AN-A0G0;TCGA-AO-A124;TCGA-AR-A0TX;TCGA-BH-A0BW;TCGA-D8-A27H	19	19	44128266	44118586
SNTB2	VPS4A	3	Read_Through	8	TCGA-A2-A0D2;TCGA-A2-A0EY;TCGA-A8-A09I;TCGA-AN-A0XR;TCGA-AO-A0J6;TCGA-D8-A27H;TCGA-E2-A109;TCGA-E2-A15K	16	16	69333677	69349911
PLEKHO2	ANKDD1A	3	Read_Through	8	TCGA-A2-A0D2;TCGA-A7-A0CE;TCGA-A8-A075;TCGA-AO-A0J4;TCGA-AO-A124;TCGA-AR-A24Z;TCGA-BH-A0BW;TCGA-D8-A27H	15	15	65153774	65218265
PRKAA1	TTC33	3	Read_Through	8	TCGA-A2-A25B;TCGA-A8-A08L;TCGA-AO-A0J4;TCGA-AO-A0JM;TCGA-AO-A124;TCGA-AO-A12H;TCGA-BH-A0DT;TCGA-E2-A1LG	5	5	40764616	40747121
DUS4L	BCAP29	3	Read_Through	8	TCGA-A1-A0SM;TCGA-A7-A0CE;TCGA-A7-A13D;TCGA-A8-A075;TCGA-AO-A0J6;TCGA-AR-A256;TCGA-BH-A0DG;TCGA-E2-A14P	7	7	107217037	107221204
LRRc37A	LRRC37/LRRC37A3	3	Read_Through	7	TCGA-A2-A0YG;TCGA-A8-A08L;TCGA-AN-A04D;TCGA-AN-A0AT;TCGA-AO-A0J6;TCGA-AO-A12H;TCGA-E2-A152	17	17	43661938	43623042
PBXIP1	PMVK	3	Read_Through	7	TCGA-A7-A0CE;TCGA-A7-A13D;TCGA-AO-A0J4;TCGA-AO-A0J6;TCGA-B6-A0RE;TCGA-BH-A0E0;TCGA-BH-A0WA	1	1	154918048	154904891
ARID3C	DCTN3	3	Read_Through	6	TCGA-A2-A04T;TCGA-A7-A0CE;TCGA-A8-A08L;TCGA-AN-A04D;TCGA-AR-A1AY;TCGA-E2-A1LG	9	9	34627694	34618757
ZNF606	C19orf18	3	Read_Through	6	TCGA-A2-A0EY;TCGA-A8-A08S;TCGA-AN-A0AT;TCGA-AO-A0J6;TCGA-B6-A0RE;TCGA-D8-A27F	19	19	58499575	58485571
KSR1	LGALS9	3	Read_Through	6	TCGA-A7-A0CE;TCGA-AO-A0J6;TCGA-AO-A124;TCGA-B6-A0RE;TCGA-BH-A0BW;TCGA-E2-A1LG	17	17	25944454	25965289
TCEANC	RAB9A	3	Read_Through	6	TCGA-A2-A0D2;TCGA-A7-A26G;TCGA-AN-A0G0;TCGA-AO-A0J6;TCGA-B6-A0RE;TCGA-BH-A0DG	X	X	13698717	13721933
SHANK3	ACR	3	Read_Through	6	TCGA-AN-A04D;TCGA-AO-A0J4;TCGA-AO-A0J6;TCGA-AO-A12H;TCGA-AR-A1AY;TCGA-EW-A1J5	22	22	51154181	51182489
C1RL-AS1	CLSTN3	3	Read_Through	6	TCGA-A2-A0YG;TCGA-A7-A0CE;TCGA-AO-A124;TCGA-AO-A12H;TCGA-BH-A0BW;TCGA-EW-A1PB	12	12	7273221	7285620
LINC00493	DTD1	3	Read_Through	6	TCGA-A2-A259;TCGA-A8-A094;TCGA-AN-A04D;TCGA-D8-A27F;TCGA-E2-A1LG;TCGA-EW-A1PB	20	20	18548240	18574375
VAMP1	CD27-AS1	3	Read_Through	6	TCGA-A1-A0SM;TCGA-A2-A04P;TCGA-A2-A0D1;TCGA-A8-A08L;TCGA-A8-A08S;TCGA-AR-A0TX	12	12	6574056	6557923
IFRD1	LSMEM1	3	Read_Through	6	TCGA-A2-A0CM;TCGA-A2-A0D2;TCGA-A7-A0CE;TCGA-AN-A0AT;TCGA-D8-A27F;TCGA-E2-A14P	7	7	112112916	112124867
ZNF662	KRBOX1	3	Read_Through	6	TCGA-A1-A0SM;TCGA-A2-A04P;TCGA-A8-A094;TCGA-B6-A0WX;TCGA-BH-A0E0;TCGA-EW-A1P8	3	3	42950401	42980342
FBXO31	C16orf95	3	Read_Through	6	TCGA-A2-A0D2;TCGA-A7-A0CE;TCGA-A8-A094;TCGA-AO-A0J6;TCGA-AR-A1AY;TCGA-EW-A1PB	16	16	87367492	87349429
TYSND1	AIFM2	3	Read_Through	5	TCGA-A2-A0D4;TCGA-A8-A094;TCGA-A8-A09X;TCGA-B6-A0RE;TCGA-C8-A12Q	10	10	71902424	71883853
MGC21881	BC019880	3	Read_Through	5	TCGA-AN-A0AT;TCGA-AN-A0XR;TCGA-AR-A256;TCGA-BH-A0DG;TCGA-E2-A14P	9	9	41954749	41948877
TRIM3	HPX	3	Read_Through	5	TCGA-A1-A0SM;TCGA-A8-A07B;TCGA-A8-A08L;TCGA-AN-A04D;TCGA-BH-A18R	11	11	6470536	6461960
PRKCH	FLJ22447	3	Read_Through	5	TCGA-A1-A0SM;TCGA-A2-A0EY;TCGA-A8-A08S;TCGA-A8-A09I;TCGA-E2-A109	14	14	61997313	62117680
PCSK7	LOC100652768	3	Read_Through	5	TCGA-A2-A259;TCGA-A8-A08S;TCGA-AR-A0TX;TCGA-BH-A0BW;TCGA-BH-A0EA	11	11	117077397	117072630
L3HYPDH	GPR135	3	Read_Through	5	TCGA-A8-A092;TCGA-AN-A04D;TCGA-AN-A0AT;TCGA-E2-A15K;TCGA-E2-A1LG	14	14	59942587	59927891
UBE2D2	CXXC5	3	Read_Through	5	TCGA-A2-A0D4;TCGA-A8-A08L;TCGA-A8-A08S;TCGA-AR-A24Z;TCGA-E2-A109	5	5	139003046	139059949
KLHL22	SCARF2	3	Read_Through	5	TCGA-A8-A08L;TCGA-AN-A0G0;TCGA-AO-A12H;TCGA-BH-A0H6;TCGA-EW-A1P8	22	22	20800730	20786275
POC1B	DUSP6	3	Read_Through	5	TCGA-A2-A04T;TCGA-AO-A0J6;TCGA-B6-A0RE;TCGA-C8-A130;TCGA-D8-A27H	12	12	89853415	89744802
TRIM2	MND1	3	Read_Through	4	TCGA-AN-A04D;TCGA-B6-A0RE;TCGA-BH-A18U;TCGA-E2-A1LG	4	4	154249822	154271216
KIAA1841	C2orf74	3	Read_Through	4	TCGA-A1-A0SM;TCGA-AN-A04D;TCGA-BH-A0H0;TCGA-BH-A0H6	2	2	61361411	61389977
FEN1	FADS2	3	Read_Through	4	TCGA-A2-A259;TCGA-A8-A094;TCGA-BH-A0H6;TCGA-E2-A109	11	11	61560500	61605250
PLAUR	CADM4	3	Read_Through	4	TCGA-A1-A0SM;TCGA-AO-A0J6;TCGA-AR-A24Z;TCGA-C8-A12L	19	19	44156377	44131942
ARF3	FKBP11	3	Read_Through	4	TCGA-A7-A13D;TCGA-AO-A0J4;TCGA-AR-A1AY;TCGA-BH-A0BW	12	12	49333438	49318431
AQP5	AQP6	3	Read_Through	4	TCGA-A7-A26G;TCGA-AO-A0J4;TCGA-AR-A1AY;TCGA-E2-A14P	12	12	50357958	50368107
FLJ43663	LOC646329	3	Read_Through	4	TCGA-A7-A0CE;TCGA-AN-A0XR;TCGA-AO-A0J4;TCGA-AO-A0J6	7	7	130630479	130569155
CIRBP	C19orf24	3	Read_Through	4	TCGA-AN-A0G0;TCGA-AR-A0TX;TCGA-E2-A14P;TCGA-EW-A1P8	19	19	1274439	1277182
PCBD2	CATSPER3	3	Read_Through	4	TCGA-A2-A0D1;TCGA-A8-A09X;TCGA-AN-A0G0;TCGA-E2-A15K	5	5	134294810	134331963
PSMA4	CHRNA5	3	Read_Through	4	TCGA-A1-A0SM;TCGA-A8-A08S;TCGA-BH-A18R;TCGA-E2-A109	15	15	78839040	78873153
CCBP2	ZNF662	3	Read_Through	4	TCGA-A7-A13D;TCGA-A8-A094;TCGA-EW-A1P8;TCGA-EW-A1PB	3	3	42861203	42950288
LOC338799	RHOF	3	Read_Through	4	TCGA-A7-A26G;TCGA-A8-A09X;TCGA-AN-A04D;TCGA-AO-A0J4	12	12	122237753	122231145
MORF4L2-AS1	TMEM31	3	Read_Through	4	TCGA-A2-A04P;TCGA-A8-A094;TCGA-BH-A0AV;TCGA-D8-A27F	X	X	102942414	102967164
BC017971	BST1	3	Read_Through	4	TCGA-A2-A0D1;TCGA-A2-A0D4;TCGA-BH-A0AV;TCGA-BH-A0DT	4	4	15688771	15707138
PPRC1	NOLC1	3	Read_Through	4	TCGA-A7-A0CE;TCGA-B6-A0RE;TCGA-BH-A18R;TCGA-E2-A109	10	10	103909086	103916776
RPL7	LOC100130301	3	Read_Through	4	TCGA-A8-A075;TCGA-A8-A08S;TCGA-AN-A0AT;TCGA-BH-A18R	8	8	74204474	74171737
AK098263	EXOSC3	3	Read_Through	4	TCGA-A2-A0D4;TCGA-AN-A04D;TCGA-AO-A0J6;TCGA-D8-A27F	9	9	37800664	37784060
ASL	CRCP	3	Read_Through	4	TCGA-AN-A0G0;TCGA-BH-A0H0;TCGA-C8-A12L;TCGA-E2-A15K	7	7	65557650	65592691
CLDN12	CDK14	3	Read_Through	3	TCGA-A8-A08L;TCGA-BH-A0DT;TCGA-E2-A152	7	7	90034922	90108542
AK097351	SLC6A16	3	Read_Through	3	TCGA-AR-A0TX;TCGA-BH-A0DG;TCGA-BH-A0H6	19	19	49835311	49814668
DHRS13	FLOT2	3	Read_Through	3	TCGA-AN-A04D;TCGA-AN-A0G0;TCGA-AO-A0J4	17	17	27228008	27216044
STARD3	TCAP	3	Read_Through	3	TCGA-A8-A08L;TCGA-A8-A09I;TCGA-BH-A18U	17	17	37818597	37821969
TIRAP	DCPS	3	Read_Through	3	TCGA-A2-A0D1;TCGA-BH-A18R;TCGA-E2-A1LG	11	11	126164534	126176465
ADCK4	NUMBL	3	Read_Through	3	TCGA-AO-A12H;TCGA-BH-A0WA;TCGA-EW-A1P8	19	19	41198856	41192900
GLTSCR2	SEPW1	3	Read_Through	3	TCGA-A2-A0EY;TCGA-AR-A24Z;TCGA-BH-A18U	19	19	48260435	48283982
LOC254896	TNFRSF10C	3	Read_Through	3	TCGA-A8-A08S;TCGA-AO-A124;TCGA-BH-A0BW	8	8	22947801	22969233
BC070061	HMGN3	3	Read_Through	3	TCGA-A2-A0EY;TCGA-AR-A1AY;TCGA-EW-A1PB	6	6	80022085	79924739
KIAA1984	RABL6	3	Read_Through	3	TCGA-A2-A0D4;TCGA-BH-A0H0;TCGA-BH-A0H6	9	9	139701518	139717977
LOC389641	CHMP7	3	Read_Through	3	TCGA-AN-A0G0;TCGA-BH-A18R;TCGA-E2-A14P	8	8	23085666	23103769
CPSF6	LYZ	3	Read_Through	3	TCGA-A1-A0SM;TCGA-A8-A08S;TCGA-E2-A109	12	12	69656342	69743888
TEAD2	SLC6A16	3	Read_Through	3	TCGA-A2-A0EY;TCGA-AO-A124;TCGA-AR-A0TX	19	19	49845695	49797285
DPM2	PIP5KL1	3	Read_Through	3	TCGA-A7-A26G;TCGA-A8-A07B;TCGA-A8-A08L	9	9	130698832	130690498
NPTXR	DNAL4	3	Read_Through	3	TCGA-A8-A08L;TCGA-AR-A0TX;TCGA-BH-A0AV	22	22	39219088	39178875
PPP1R1B	STARD3	3	Read_Through	3	TCGA-A8-A09I;TCGA-AO-A124;TCGA-AR-A0TX	17	17	37791979	37809734
SLC25A16	DNA2	3	Read_Through	3	TCGA-A1-A0SM;TCGA-BH-A0DG;TCGA-E2-A109	10	10	70246901	70229920
DUS3L	PRR22	3	Read_Through	3	TCGA-A2-A259;TCGA-D8-A27F;TCGA-EW-A1PB	19	19	5785394	5784450
ERGIC1	RPL26L1	3	Read_Through	3	TCGA-A2-A04T;TCGA-AO-A0J4;TCGA-E2-A109	5	5	172362313	172386868
LOC401320	GGCT	3	Read_Through	3	TCGA-A1-A0SM;TCGA-A2-A0D1;TCGA-AN-A0G0	7	7	30563983	30540297
TMC5	CCP110	3	Read_Through	3	TCGA-A2-A259;TCGA-A8-A08L;TCGA-AR-A24Z	16	16	19508485	19539189
ZDHHC1	TPPP3	3	Read_Through	3	TCGA-A8-A08L;TCGA-AO-A0J6;TCGA-EW-A1PB	16	16	67428905	67425020
ZNF264	AURKC	3	Read_Through	3	TCGA-A2-A0D2;TCGA-AN-A0XR;TCGA-C8-A130	19	19	57716860	57743110
D2HGDH	GAL3ST2	3	Read_Through	3	TCGA-A2-A04P;TCGA-A2-A0CM;TCGA-A8-A08L	2	2	242695429	242738480
DMKN	KRTDAP	3	Read_Through	3	TCGA-A2-A0D1;TCGA-E2-A1LG;TCGA-EW-A1J5	19	19	35990860	35979742
HSF4	NOL3	3	Read_Through	3	TCGA-A2-A04T;TCGA-A8-A08L;TCGA-AN-A04D	16	16	67203004	67208065
ARMC9	B3GNT7	3	Read_Through	3	TCGA-A1-A0SM;TCGA-A2-A0D2;TCGA-AO-A0J6	2	2	232234836	232262442
RAB9A	OFD1	3	Read_Through	3	TCGA-AN-A0AT;TCGA-AO-A0J6;TCGA-AR-A256	X	X	13722021	13753367
RIPK3	ADCY4	3	Read_Through	3	TCGA-A1-A0SM;TCGA-BH-A0EA;TCGA-BH-A0H0	14	14	24806091	24802194
TINF2	NEDD8/NEDD8-MDP1	3	Read_Through	3	TCGA-A2-A0D1;TCGA-A7-A0CE;TCGA-C8-A12Q	14	14	24709270	24687637
BX648270	C2orf27A	3	Read_Through	2	TCGA-AR-A0TX;TCGA-C8-A130	2	2	132445876	132508206
ZNF713	MRPS17	3	Read_Through	2	TCGA-A2-A0D1;TCGA-A2-A0D2	7	7	55991392	56020872
CAGE1	SSR1	3	Read_Through	2	TCGA-AO-A0J4;TCGA-BH-A0BW	6	6	7330082	7310262
CECR7	IL17RA	3	Read_Through	2	TCGA-AN-A0AT;TCGA-AO-A0J4	22	22	17528316	17577952
SYTL4	TSPAN6	3	Read_Through	2	TCGA-A2-A0D4;TCGA-AR-A24Z	X	X	99940987	99890743
RNASET2	RPS6KA2	3	Read_Through	2	TCGA-A8-A094;TCGA-A8-A09X	6	6	167352383	167271747
UTP6	COPRS	3	Read_Through	2	TCGA-AR-A0TX;TCGA-C8-A130	17	17	30195065	30183884
ARHGAP11A	SCG5	3	Read_Through	2	TCGA-BH-A0H0;TCGA-EW-A1PB	15	15	32928116	32935787
B4GALT1	SMU1	3	Read_Through	2	TCGA-A7-A0CE;TCGA-AO-A0J4	9	9	33135187	33068932
DCUN1D2	ADPRHL1	3	Read_Through	2	TCGA-A2-A0D4;TCGA-E2-A15K	13	13	114113627	114098904
HAUS4	PRMT5	3	Read_Through	2	TCGA-A2-A0D1;TCGA-A8-A08S	14	14	23416380	23397824
PLA2G12A	CASP6	3	Read_Through	2	TCGA-AN-A0G0;TCGA-AR-A24Z	4	4	110650758	110619498
RAD51AP1	DYRK4	3	Read_Through	2	TCGA-A2-A0EY;TCGA-E2-A1LG	12	12	4662313	4677121
ZNF674-AS1	CHST7	3	Read_Through	2	TCGA-A8-A08S;TCGA-AO-A12H	X	X	46405062	46457195
AGR3	AGR2	3	Read_Through	2	TCGA-A2-A0D4;TCGA-BH-A18U	7	7	16913404	16841427
BZW2	TSPAN13	3	Read_Through	2	TCGA-A2-A04T;TCGA-A2-A0D4	7	7	16736686	16815836
E2F1	NECAB3	3	Read_Through	2	TCGA-AN-A0AT;TCGA-AO-A0J4	20	20	32264911	32260228
LOC100506499	C14orf182	3	Read_Through	2	TCGA-A2-A0CM;TCGA-E2-A1LG	14	14	50477652	50459591
VMAC	CAPS	3	Read_Through	2	TCGA-A8-A094;TCGA-EW-A1PB	19	19	5905092	5914396
ANGEL1	AK125727	3	Read_Through	2	TCGA-BH-A0EA;TCGA-C8-A130	14	14	77256954	77249119
BC041434	NIPAL1	3	Read_Through	2	TCGA-A1-A0SM;TCGA-E2-A109	4	4	47916721	48027085
KLHDC4	FLJ00104	3	Read_Through	2	TCGA-A2-A0D2;TCGA-E2-A14P	16	16	87741956	87732068
MAGIX	PLP2	3	Read_Through	2	TCGA-A8-A08L;TCGA-BH-A0H0	X	X	49021699	49029476
NPC2	SYNDIG1L	3	Read_Through	2	TCGA-A2-A0D1;TCGA-BH-A0BW	14	14	74947405	74876504
OAS3	OAS2	3	Read_Through	2	TCGA-AN-A0XR;TCGA-EW-A1J5	12	12	113407560	113424843
ARNTL2	SMCO2	3	Read_Through	2	TCGA-AO-A0J6;TCGA-EW-A1P8	12	12	27571129	27627719
AY660577/AY660578	MID1	3	Read_Through	2	TCGA-AO-A0J4;TCGA-D8-A27F	X	X	11074056	10535643
FLVCR1-AS1	C1orf227	3	Read_Through	2	TCGA-A2-A0CM;TCGA-A8-A08L	1	1	213031108	213009529
UBE2Q2	FBXO22	3	Read_Through	2	TCGA-A2-A04T;TCGA-AO-A0J6	15	15	76175765	76205544
WIZ	AKAP8L	3	Read_Through	2	TCGA-A2-A0EY;TCGA-C8-A12L	19	19	15537793	15521405
CENPE	BDH2	3	Read_Through	2	TCGA-AN-A04D;TCGA-AO-A0J6	4	4	104029960	104017431
DPP9	C19orf10	3	Read_Through	2	TCGA-BH-A0H6;TCGA-BH-A18U	19	19	4679847	4668657
FBXL19	ORAI3	3	Read_Through	2	TCGA-A7-A0CE;TCGA-AN-A04D	16	16	30953857	30964506
HIGD1A	CCDC13	3	Read_Through	2	TCGA-BH-A0H6;TCGA-EW-A1PB	3	3	42835649	42799843
LOC100505622	AK024119	3	Read_Through	2	TCGA-A1-A0SM;TCGA-BH-A0BW	19	19	42637180	42659859
MED8	ELOVL1	3	Read_Through	2	TCGA-AR-A0TX;TCGA-BH-A0DT	1	1	43850717	43831294
NUTF2	EDC4	3	Read_Through	2	TCGA-A8-A08L;TCGA-AN-A04D	16	16	67902502	67909641
SAR1A	TYSND1	3	Read_Through	2	TCGA-AO-A0J6;TCGA-D8-A27F	10	10	71930169	71899897
THAP5	PNPLA8	3	Read_Through	2	TCGA-AN-A0G0;TCGA-AR-A24Z	7	7	108209934	108161965
ZNF544	ZNF8	3	Read_Through	2	TCGA-A1-A0SM;TCGA-A2-A0EY	19	19	58758160	58797083
BC035370	JAK1	3	Read_Through	2	TCGA-A2-A259;TCGA-AN-A0XR	1	1	65455118	65352024
BC039389	GATM	3	Read_Through	2	TCGA-A2-A0D1;TCGA-BH-A0H0	15	15	45672682	45669017
CTNNBIP1	CLSTN1	3	Read_Through	2	TCGA-AO-A0J6;TCGA-D8-A27H	1	1	9931245	9833452
CTNNBL1	VSTM2L	3	Read_Through	2	TCGA-AO-A124;TCGA-EW-A1P8	20	20	36488746	36560037
FAM175A	HELQ	3	Read_Through	2	TCGA-AN-A0XR;TCGA-AR-A256	4	4	84384647	84375098
GALT	IL11RA	3	Read_Through	2	TCGA-A2-A0D2;TCGA-D8-A27H	9	9	34649561	34655215
MED22	SURF6	3	Read_Through	2	TCGA-AN-A0G0;TCGA-B6-A0WX	9	9	136210980	136201437
RC3H1	SERPINC1	3	Read_Through	2	TCGA-AN-A04D;TCGA-AO-A12H	1	1	173910403	173884057
SOCS5	LOC100134259	3	Read_Through	2	TCGA-AN-A0AT;TCGA-BH-A0AV	2	2	46926588	47083062
TOMM40	APOE	3	Read_Through	2	TCGA-A2-A0D2;TCGA-A7-A13D	19	19	45404567	45409859
TYMP	SCO2	3	Read_Through	2	TCGA-A8-A09I;TCGA-AO-A0J6	22	22	50968333	50962853
CUL5	ACAT1	3	Read_Through	2	TCGA-E2-A1LG;TCGA-EW-A1PB	11	11	107969256	108002634
DHTKD1	SEC61A2	3	Read_Through	2	TCGA-A1-A0SM;TCGA-AO-A0J6	10	10	12162266	12175240
LMNA	SEMA4A	3	Read_Through	2	TCGA-AO-A0J4;TCGA-C8-A12L	1	1	156107534	156126205
TMEM107	VAMP2	3	Read_Through	2	TCGA-A7-A13D;TCGA-AO-A0J6	17	17	8079518	8065687
ZCCHC17	SERINC2	3	Read_Through	2	TCGA-A2-A0D1;TCGA-AR-A24Z	1	1	31821821	31883232
PKN3	LOC100506100	3	Read_Through	1	TCGA-A7-A0CE	9	9	131482296	131495121
SMR3B	PROL1	3	Read_Through	1	TCGA-AN-A0G0	4	4	71227886	71264988
MROH9	FMO3	3	Read_Through	1	TCGA-A2-A0YG	1	1	170983395	171061794
VSTM2A	LOC285878	3	Read_Through	1	TCGA-AO-A12H	7	7	54617863	54638463
BC026261	DAB2	3	Read_Through	1	TCGA-A7-A0CE	5	5	39462180	39394523
MUM1	NDUFS7	3	Read_Through	1	TCGA-A8-A08B	19	19	1373159	1387810
ZNF207	PSMD11	3	Read_Through	1	TCGA-A8-A08S	17	17	30700472	30773963
AK056584	MLIP-IT1	3	Read_Through	1	TCGA-BH-A0BW	6	6	53847648	53871769
CDSN	C6orf15	3	Read_Through	1	TCGA-A8-A08L	6	6	31088112	31080068
RCOR3	TRAF5	3	Read_Through	1	TCGA-A2-A0CM	1	1	211469095	211542794
ADSL	SGSM3	3	Read_Through	1	TCGA-AO-A124	22	22	40761060	40796700
SDHD	TEX12	3	Read_Through	1	TCGA-E2-A1LG	11	11	111959735	112041142
TC2N	CATSPERB	3	Read_Through	1	TCGA-A2-A0YG	14	14	92251506	92195823
ATP5G1	UBE2Z	3	Read_Through	1	TCGA-A8-A07B	17	17	46972696	46988170
SYT8	TNNI2	3	Read_Through	1	TCGA-BH-A0WA	11	11	1858091	1860905
BC022056	POU2AF1	3	Read_Through	1	TCGA-BH-A0E0	11	11	111256979	111229643
REM1	LINC00028	3	Read_Through	1	TCGA-A2-A0D2	20	20	30070291	30074835
PEAK1	TSPAN3	3	Read_Through	1	TCGA-A2-A04T	15	15	77425347	77348597
GALNT8	KCNA6	3	Read_Through	1	TCGA-AN-A0AT	12	12	4874712	4959904
HCP5	MICB	3	Read_Through	1	TCGA-AO-A124	6	6	31431056	31473394
ORMDL3	GSDMB	3	Read_Through	1	TCGA-C8-A12L	17	17	38079365	38073574
TBC1D26	CDRT15P2	3	Read_Through	1	TCGA-E2-A14P	17	17	15647766	15668422
AY660578	MID1	3	Read_Through	1	TCGA-AO-A0J6	X	X	11074056	10535643
C1orf210	EBNA1BP2	3	Read_Through	1	TCGA-A8-A07B	1	1	43748923	43727589
C3orf67	FAM3D	3	Read_Through	1	TCGA-AN-A04D	3	3	58720199	58641328
CNPY2	CS	3	Read_Through	1	TCGA-A7-A0CE	12	12	56704742	56680429
CREBBP	TRAP1	3	Read_Through	1	TCGA-B6-A0RE	16	16	3817721	3716119
DCAF7	TACO1	3	Read_Through	1	TCGA-E2-A14P	17	17	61662690	61681894
LOC100505761	TMEM180	3	Read_Through	1	TCGA-AN-A0G0	10	10	104210087	104228712
LOC642929	ANKRD20A3	3	Read_Through	1	TCGA-E2-A1LG	9	9	43142629	43129917
PFKFB4	SHISA5	3	Read_Through	1	TCGA-BH-A18U	3	3	48559419	48538726
UQCR11	MBD3	3	Read_Through	1	TCGA-AO-A0J6	19	19	1599411	1585213
ZNF628	NAT14	3	Read_Through	1	TCGA-E2-A109	19	19	55988174	55997028
ABHD14B	PCBP4	3	Read_Through	1	TCGA-AO-A124	3	3	52007981	51995320
ASNSD1	ANKAR	3	Read_Through	1	TCGA-E2-A1LG	2	2	190532671	190554253
BRDT	EPHX4	3	Read_Through	1	TCGA-EW-A1J5	1	1	92470856	92498062
CD207	CLEC4F	3	Read_Through	1	TCGA-D8-A27F	2	2	71058832	71036989
CRY2	MAPK8IP1	3	Read_Through	1	TCGA-A2-A0EY	11	11	45893784	45919636
FADS1	TMEM258	3	Read_Through	1	TCGA-BH-A0BW	11	11	61570835	61558074
ITCH	DYNLRB1	3	Read_Through	1	TCGA-A2-A0D1	20	20	33092208	33114073
LOC644215	RRP12	3	Read_Through	1	TCGA-AO-A0J4	10	10	99184558	99161127
PCMTD1	PXDNL	3	Read_Through	1	TCGA-AR-A24Z	8	8	52758221	52567320
PVRL4	ARHGAP30	3	Read_Through	1	TCGA-AO-A0J4	1	1	161046145	161026322
RPS7	COLEC11	3	Read_Through	1	TCGA-BH-A0E0	2	2	3627850	3660901
SPINK8	NME6	3	Read_Through	1	TCGA-A2-A0EY	3	3	48351394	48340013
TMEM205	RAB3D	3	Read_Through	1	TCGA-A8-A094	19	19	11456196	11448136
UBE2J2	FAM132A	3	Read_Through	1	TCGA-AO-A0J4	1	1	1191425	1179877
ZBTB1	PPP1R36	3	Read_Through	1	TCGA-AO-A0J4	14	14	64971664	65031469
BHLHB9	LINC00630	3	Read_Through	1	TCGA-AN-A0G0	X	X	101975955	102071920
C1orf85	AF086351	3	Read_Through	1	TCGA-AO-A124	1	1	156263111	156260151
GNG10	UGCG	3	Read_Through	1	TCGA-A1-A0SM	9	9	114429226	114676885
KIF1B	PGD	3	Read_Through	1	TCGA-AO-A0J6	1	1	10435431	10459686
KRIT1	LRRD1	3	Read_Through	1	TCGA-A2-A0EY	7	7	91842509	91788517
LOC100132077	HIATL1	3	Read_Through	1	TCGA-AR-A0TX	9	9	97101302	97177440
MGC45800	AK056196	3	Read_Through	1	TCGA-BH-A0H6	4	4	183065200	183002979
NICN1	AMT	3	Read_Through	1	TCGA-AO-A0J6	3	3	49462382	49459704
PACSIN2	ARFGAP3	3	Read_Through	1	TCGA-AN-A04D	22	22	43272143	43243638
PLEKHA1	ARMS2	3	Read_Through	1	TCGA-A7-A0CE	10	10	124183779	124216423
QRICH1	IMPDH2	3	Read_Through	1	TCGA-AR-A1AY	3	3	49069616	49066239
RIPPLY2	CYB5R4	3	Read_Through	1	TCGA-AN-A0AT	6	6	84563880	84573894
RRM2	C2orf48	3	Read_Through	1	TCGA-A7-A26G	2	2	10269281	10281981
SLC35A2	TIMM17B	3	Read_Through	1	TCGA-E2-A14P	X	X	48763669	48752384
TINF2	NEDD8	3	Read_Through	1	TCGA-E2-A14P	14	14	24709270	24687637
UQCRQ	LEAP2	3	Read_Through	1	TCGA-AO-A0JM	5	5	132202727	132209642
VAPB	GNAS	3	Read_Through	1	TCGA-AR-A0TX	20	20	56964573	57470667
BC038442	SP6	3	Read_Through	1	TCGA-E2-A109	17	17	45995818	45925852
BC072410	BC043529	3	Read_Through	1	TCGA-A2-A0EY	17	17	20835084	20852416
C17orf99	SYNGR2	3	Read_Through	1	TCGA-BH-A0BW	17	17	76160445	76166898
CLEC4F	FIGLA	3	Read_Through	1	TCGA-A2-A04P	2	2	71036871	71014933
DNAJC25-GNG10	UGCG	3	Read_Through	1	TCGA-A1-A0SM	9	9	114429226	114676885
DRAXIN	AGTRAP	3	Read_Through	1	TCGA-AR-A0TX	1	1	11775265	11805860
DYNLL1-AS1	SRSF9	3	Read_Through	1	TCGA-E2-A14P	12	12	120933626	120903590
EED	C11orf73	3	Read_Through	1	TCGA-A2-A0EY	11	11	85989033	86017287
EFEMP2	CFL1	3	Read_Through	1	TCGA-AO-A124	11	11	65635332	65623713
EIF6	EDEM2	3	Read_Through	1	TCGA-AR-A256	20	20	33867369	33859948
FOXRED2	TXN2	3	Read_Through	1	TCGA-AR-A256	22	22	36889680	36876884
GPR1AS	ZDBF2	3	Read_Through	1	TCGA-AO-A124	2	2	207124739	207144264
HBS1L	ALDH8A1	3	Read_Through	1	TCGA-A1-A0SM	6	6	135287467	135265104
LAMTOR5	SLC16A4	3	Read_Through	1	TCGA-A2-A0EY	1	1	110946541	110931977
LOC100652772	PAIP1	3	Read_Through	1	TCGA-AO-A0J4	5	5	43583569	43556101
MED31	KIAA0753	3	Read_Through	1	TCGA-AN-A0G0	17	17	6554821	6538491
MMP25	IL32	3	Read_Through	1	TCGA-A2-A0CM	16	16	3108670	3115782
MND1	KIAA0922	3	Read_Through	1	TCGA-AO-A0J6	4	4	154330167	154388363
NECAP1	CLEC4A	3	Read_Through	1	TCGA-A1-A0SM	12	12	8242895	8288181
PDLIM2	C8orf58	3	Read_Through	1	TCGA-AO-A0J4	8	8	22447254	22458395
PTGFRN	CD101	3	Read_Through	1	TCGA-C8-A12L	1	1	117516945	117552472
RPL27	IFI35	3	Read_Through	1	TCGA-AO-A124	17	17	41150848	41164196
RPS19	CD79A	3	Read_Through	1	TCGA-A2-A0EY	19	19	42365281	42383060
SAMM50	PARVB	3	Read_Through	1	TCGA-A8-A08S	22	22	44386286	44395414
TFB1M	AK022993	3	Read_Through	1	TCGA-AN-A0AT	6	6	155606292	155574898
TMEM27	ACE2	3	Read_Through	1	TCGA-A7-A26G	X	X	15657685	15619137
ZNF451	BAG2	3	Read_Through	1	TCGA-AR-A0TX	6	6	57025950	57048576
ZNF473	FLJ26850	3	Read_Through	1	TCGA-AO-A0J6	19	19	50545076	50565057
AIMP2	ANKRD61	3	Read_Through	1	TCGA-AR-A0TX	7	7	6057676	6072470
AK093356	CISD2	3	Read_Through	1	TCGA-AN-A0AT	4	4	103749342	103806373
AK125676	KIAA1467	3	Read_Through	1	TCGA-A8-A08S	12	12	13175095	13208485
ALG14	CNN3	3	Read_Through	1	TCGA-AO-A0J6	1	1	95492685	95369080
ARHGDIB	ERP27	3	Read_Through	1	TCGA-AR-A0TX	12	12	15097710	15090986
ASAP3	TCEA3	3	Read_Through	1	TCGA-BH-A0H0	1	1	23757528	23745632
ATF2	CHN1	3	Read_Through	1	TCGA-AO-A0J4	2	2	175945388	175816930
BACE2	FAM3B	3	Read_Through	1	TCGA-AN-A04D	21	21	42629253	42710305
BC017578	LOC157273	3	Read_Through	1	TCGA-EW-A1P8	8	8	9047096	9183412
C19orf45	ZNF358	3	Read_Through	1	TCGA-AN-A04D	19	19	7572027	7584091
C1orf198	AGT	3	Read_Through	1	TCGA-D8-A27H	1	1	230979100	230846599
CCDC6	LINC00948	3	Read_Through	1	TCGA-AO-A0J6	10	10	61564178	61498320
DCAF8	AK093299	3	Read_Through	1	TCGA-AO-A0J6	1	1	160188114	160172306
ENO2	ATN1	3	Read_Through	1	TCGA-AO-A124	12	12	7031565	7043003
ENTPD4	LOXL2	3	Read_Through	1	TCGA-A8-A094	8	8	23291830	23225947
ERF	GSK3A	3	Read_Through	1	TCGA-AO-A0J4	19	19	42759130	42744294
FAM84A	AX747684	3	Read_Through	1	TCGA-AN-A0AT	2	2	14773061	14789440
FANCG	VCP	3	Read_Through	1	TCGA-AN-A04D	9	9	35074924	35068359
FBXO46	SNRPD2	3	Read_Through	1	TCGA-EW-A1P8	19	19	46234107	46191824
GAS5	CENPL	3	Read_Through	1	TCGA-A1-A0SM	1	1	173833395	173793157
GMFG	BC110060	3	Read_Through	1	TCGA-AO-A0J4	19	19	39823717	39808998
GMIP	LPAR2	3	Read_Through	1	TCGA-A2-A0D2	19	19	19741280	19738778
HCG25	RPS18	3	Read_Through	1	TCGA-B6-A0RE	6	6	33218488	33240405
HORMAD1	GOLPH3L	3	Read_Through	1	TCGA-AO-A0J4	1	1	150675786	150667326
KIAA0753	PITPNM3	3	Read_Through	1	TCGA-BH-A18R	17	17	6493099	6441402
LOC100506314	AK125676	3	Read_Through	1	TCGA-A7-A0CE	12	12	13133325	13174948
LOC285847	FKBP5	3	Read_Through	1	TCGA-BH-A0H0	6	6	35697099	35688325
MATR3	PAIP2	3	Read_Through	1	TCGA-A2-A259	5	5	138661973	138699448
MCCC1	DCUN1D1	3	Read_Through	1	TCGA-A2-A0YG	3	3	182737918	182683541
MED12	NLGN3	3	Read_Through	1	TCGA-A8-A08L	X	X	70361814	70367400
METTL23	MFSD11	3	Read_Through	1	TCGA-A2-A04T	17	17	74729459	74732272
MGC72080	ASNS	3	Read_Through	1	TCGA-A2-A0EY	7	7	97557394	97499125
MOB3B	EQTN	3	Read_Through	1	TCGA-A2-A0D2	9	9	27359032	27296736
NCSTN	NHLH1	3	Read_Through	1	TCGA-AO-A124	1	1	160324080	160340347
NDUFAF6	PLEKHF2	3	Read_Through	1	TCGA-A2-A0D1	8	8	96060786	96166259
NMI	RBM43	3	Read_Through	1	TCGA-E2-A1LG	2	2	152131998	152112257
OGG1	ARPC4/ARPC4-TTLL3	3	Read_Through	1	TCGA-AO-A0J6	3	3	9793633	9839343
P2RY6	ARHGEF17	3	Read_Through	1	TCGA-A8-A075	11	11	72983511	73057928
PARL	MAP6D1	3	Read_Through	1	TCGA-AR-A24Z	3	3	183551280	183535899
PDDC1	BC048998	3	Read_Through	1	TCGA-AO-A0J6	11	11	770993	767013
PDZD4	IDH3G	3	Read_Through	1	TCGA-A8-A08L	X	X	153070552	153056306
PLEKHA8	C7orf41	3	Read_Through	1	TCGA-AN-A0G0	7	7	30113748	30185793
PPP6R1	TMEM86B	3	Read_Through	1	TCGA-EW-A1P8	19	19	55741981	55740141
PRPSAP1	QRICH2	3	Read_Through	1	TCGA-AR-A0TX	17	17	74308951	74300606
RCL1	AK021739	3	Read_Through	1	TCGA-AO-A0J4	9	9	4849550	4884488
RHBDD2	POR	3	Read_Through	1	TCGA-AR-A24Z	7	7	75513166	75583307
SDC4	MATN4	3	Read_Through	1	TCGA-E2-A14P	20	20	43959006	43929649
SHPK	TRPV1	3	Read_Through	1	TCGA-A7-A0CE	17	17	3524531	3495677
SHROOM2	WWC3	3	Read_Through	1	TCGA-A8-A08S	X	X	9912953	10031485
SIRT7	PCYT2	3	Read_Through	1	TCGA-AO-A0J4	17	17	79871650	79867478
TBC1D23	NIT2	3	Read_Through	1	TCGA-A2-A0D2	3	3	100039815	100057931
TBCEL	TECTA	3	Read_Through	1	TCGA-AR-A256	11	11	120930794	120973375
TF	SRPRB	3	Read_Through	1	TCGA-A2-A0D1	3	3	133496082	133524520
TMED3	KIAA1024	3	Read_Through	1	TCGA-C8-A12Q	15	15	79606347	79748440
TTLL5	IFT43	3	Read_Through	1	TCGA-AO-A0J4	14	14	76368567	76455228
UBE2L3	CCDC116	3	Read_Through	1	TCGA-AR-A256	22	22	21965332	21990721
UMOD	GP2	3	Read_Through	1	TCGA-BH-A0H0	16	16	20346804	20337789
URB1	MIS18A	3	Read_Through	1	TCGA-AO-A124	21	21	33688777	33647207
WNT10B	ARF3	3	Read_Through	1	TCGA-BH-A18R	12	12	49361729	49334971
ZNF660	ZNF197	3	Read_Through	1	TCGA-E2-A152	3	3	44627705	44670566
ZNF678	SNAP47	3	Read_Through	1	TCGA-A2-A0CM	1	1	227770307	227968228
AK097702	ZNF273	3	Read_Through	1	TCGA-E2-A1LG	7	7	64340617	64354126
AK294973	GLYATL1	3	Read_Through	1	TCGA-BH-A18U	11	11	58673134	58711016
BC042140	AP5S1	3	Read_Through	1	TCGA-A2-A259	20	20	3792388	3802749
C7orf26	ZNF853	3	Read_Through	1	TCGA-AR-A0TX	7	7	6641771	6656821
CR627148	PTGER4P2-CDK2AP2P2	3	Read_Through	1	TCGA-A8-A08S	9	9	66459964	66499629
DCPS	ST3GAL4	3	Read_Through	1	TCGA-AN-A0G0	11	11	126213312	126275991
DDX5	POLG2	3	Read_Through	1	TCGA-A8-A094	17	17	62496667	62489138
DHX33	C1QBP	3	Read_Through	1	TCGA-D8-A27F	17	17	5352129	5341593
DMC1	DDX17	3	Read_Through	1	TCGA-A8-A08S	22	22	38917613	38897285
DNAJC4	VEGFB	3	Read_Through	1	TCGA-A8-A09X	11	11	64001452	64002930
DUS2L	NFATC3	3	Read_Through	1	TCGA-AO-A0J4	16	16	68100539	68200746
FAM214A	ARPP19	3	Read_Through	1	TCGA-A2-A0D1	15	15	52876942	52849419
GFOD2	ENKD1	3	Read_Through	1	TCGA-AR-A256	16	16	67719360	67700168
GNPTAB	SYCP3	3	Read_Through	1	TCGA-A2-A04P	12	12	102147150	102128822
GPI	PDCD2L	3	Read_Through	1	TCGA-BH-A0H0	19	19	34887562	34895554
GSK3A	DEDD2	3	Read_Through	1	TCGA-A2-A0D2	19	19	42736209	42719404
HDAC6	ERAS	3	Read_Through	1	TCGA-AN-A04D	X	X	48682195	48687491
HOXC10	LOC400043	3	Read_Through	1	TCGA-A8-A075	12	12	54379794	54525774
HSD17B10	SMC1A	3	Read_Through	1	TCGA-A7-A0CE	X	X	53458746	53442118
INHA	STK11IP	3	Read_Through	1	TCGA-BH-A0E0	2	2	220437364	220462816
ISG20L2	CRABP2	3	Read_Through	1	TCGA-AO-A12H	1	1	156693940	156675338
LINC00282	DHRS12	3	Read_Through	1	TCGA-AN-A0AT	13	13	52412609	52373803
LOC100507463	PSMB9	3	Read_Through	1	TCGA-E2-A109	6	6	32812647	32823915
NPL	DHX9	3	Read_Through	1	TCGA-BH-A0BW	1	1	182794955	182811680
PET100	STXBP2	3	Read_Through	1	TCGA-AR-A256	19	19	7695732	7703612
RAB3D	AF161365	3	Read_Through	1	TCGA-E2-A14P	19	19	11446123	11411912
SMAGP	POU6F1	3	Read_Through	1	TCGA-EW-A1P8	12	12	51640535	51600667
SMOX	LOC728228	3	Read_Through	1	TCGA-AO-A0J6	20	20	4164301	4175929
SRP72	ARL9	3	Read_Through	1	TCGA-A8-A08S	4	4	57366861	57377351
TAGLN2	CCDC19	3	Read_Through	1	TCGA-E2-A109	1	1	159895240	159863095
TEX12	BCO2	3	Read_Through	1	TCGA-E2-A1LG	11	11	112041253	112050001
YOD1	C1orf116	3	Read_Through	1	TCGA-AN-A0G0	1	1	207224033	207201024
