# Supplementary material for: INTEGRATE: gene fusion discovery using whole genome and transcriptome data
Source: HighWire-hosted journal article supplement (doi:10.1101/gr.186114.114), 2015-11-10
Supplement: Supplemental_Table8.xlsx [file Supplemental_Table8.xlsx]

## Sheet: Sheet1
Supplementary Table 8. Sequencing probes used for validation of HCC1395 fusion candidates with canonical exonic boundaries.
5P	3P	5P_Probe	3P_Probe
EIF3K	CYP39A1	TTATCTGCCATGTTGTGGGTATCACTTACCAGCACATTGACCGCTGGCTGCTGGCCGAGATGCTCGGGGATCTGTCGG	TGCCCAGTAAACTGATGGAGATTGACAGTCCCCATTTTCCCTTTCAACATAATATAGAGTTTTTCATGCAGTGCTAAAAAGACATTCTTTGGAATTGATGCTATGAACAAAGAAAACTAT
MDH1	RP11-357C3.3	GTCAGCTCCATCCATCCCCAAGGAGAACTTCAGTTGCTTGACTCGTTTGGATCACAACCGAGCTAAAGCTCAAGTAAGAAAAATATATTTTAAATCTTGTGGTTGTTCAACTTTAAAACA	GTACCTTGCTTGGTCACTCAGCACTCCTAGGTGTCATTATAAGCTCTACTTTGGATCCCACTTCTGACATCATCTGTTAAAACAGAAACAAACAAACAAACAAAAACTTCAGCTGAATTA
LMF1	FOXK2	GTGCCCGTGTGGAGATGGGCCGGAGAGCCTGCGGGGCCACGCCCCGGCGCGGGCGGCGACTCAGGCTCCGGATCCGAGTACCCAGTCTTCCGCCTCCTCAGCGACTCCGCGGGCGCCGCC	TCCCTGCCCACAAAGCGCCACAACGGTGACCAGCCGGAGCAGCCGGAGCTGAAGCGGATCAAGACAGAAGACGGCGAGGGCATCGTCATTGCCCTGAGCGTGGACACGCCACCGGCAGCC
GS1-124K5.2	RP11-147C23.1	TAATCTTGCGGGTCTTCTCGTTGGTTTTCTTTCCTTCAAACTTGGAGAATGTGAGGGATTGGGCCCCTTGGCTGCTCTGACTGCTGGCAAAGGCCTCTTCTTCCTCCCGCTGGAGTCTGC	GTTCTACTATTTCTTTTAACTCAGCAAGGTAAGTCCAGGTCCTTACCTCCACCTAAAAGTTCTGCCATCAAGGAACATCTGCTCATTATCTTCTGTTCACACATCAAATGACTTCAATGT
RNGTT	RPF1	ATTGAATTTAATTATGTCATATATCAAATATCTAGGAACAGCCTGTCCATTTACTCTGTCAATAATCATCTC	GAAAAGTTGGCAGCTAAGAAAAAACTTAAAAAAGAAAGAGAGGCTCTTGGCGATAAG
RP11-83A24.2	KCNQ5	GGCTCCGTCCTTACCGTTGCTCTCCAGGTACACGCCCCCGTCAAAGGCGGCTCTGCGGCCCTCTCGCGAGAGAGTGCCCGTGGTACCTCCTTCCTCTCAGTTGTCTGTCTCTCCCCGCCC	CATATGATGTAAAAGATGTCATTGAACAATATTCTGCTGGTCATCTGGACATGTTGTGTAGAATTAAAAGCCTTCAAACACGGTAAGCAATGGAAATGTCATTCCTTGTAAAGGAATGGG
PLA2R1	RBMS1	TGAGAAGATCACTGTGCAGCCAGCTACAGACAAACTCAAAGTTCAACCATTCTGAGGCAAAGGTATGAAAAAGGTATTCTGCATCCTGATAAAAGAGCCAGGGTACATCTGAAAAAGAAA	TGTAGAAATAACTTGTCCAAATGGTTTGAGCATATTTTCTAGTTCTTGCTCATCCATGGAGAGTGGCAAATTAGAAATGTAGAGGTTGGTAGGATCTTGTTCCTGTTGCTAAAACAGAAG
RAB7A	LRCH3	CAGAACTTGGACCTTCTCGCTTCTGTCCTCCGTTTAGTCTCCTCCTCGGCGGGAGCCCTCGCGACGCGCCCGGCCCGGAGCCCCCAGCGCAGCGGCCGCGGTAAGCAGCGGGCCCAGCCC	AGTGATGACAGACCTAATGCTCTATTAAGTTCACCTGCAACAGAAACAG
SHISA5	RP11-24C3.2	AGCCAGCAGGCTTTACTTACCCTGACATGGGGTCGTTGTAGCCAGGGCGAAACCTCAGCGCCGAGCCCAGCTGCTCCACCGGCTCTACACTGGCAGGCACGCTGCAAACAGGAAACCTTG	GTCTCTAGCCAGTCTAGGATTTGCAGCGGCAGTAAGGGCCGGGAGCTGGAAACGAGGTCTCCTGCCTCCCAGGCAGTCTGGGCTTCCATTCCTTAGGAAGAGCTGCAGAAACGGAAACAG
UNC5C	STPG2	TTATTCACCTCAGCCACTGGGATCCCTTCAGGTGGTCGACACTGGAGTAAGACTTCCTGTTCCAAAGACACTTCCTTTCCTAGGGGTTCCTGCTCAAATGTCTTCCGTAGATCTGGAACG	GCAAAAACATAGCCAACTTACCTTTGACGAAGAAGCAAAGGCAGTGCAATGAAGCAAAATCATCTTTTCAATACTGATGTTGCAGTAACTGGACCTCAACCTGCAAAACAATGAATCTGA
TMEM104	RAB37	TATCAGCAGCGCCACTGGCAATGACTCCTGCGGTGTGGAAGCAGACACCAAATACAATGACACTGACCGGTGCTGGGGGCCCCTGCGCCGAGTGGACGCCTACCGCATCTACTTGGTGAG	TCCAGACCATCCTGGTGGGTGACAGTGGTGTGGGAAAGACGTCTCTGCTGGTTCAGTTCGATCAGGGCAAGTTCATCCCCGGCTCCTTCTCGGCCACTGTGGGCATCGGATTCACGGTAA
MAVS	PANK2	TCCAGATGGTGGCCCCCTGGAGTCCTCCTCTGACCTGGCAGCCCTCAGCCCTCTGACCTCCAGCGGGCATCAGGAGCAGGACACAGAACTGGGCAGTACCCACACAGCAGGTATGCATGG	TATTTTGAACCCAAAGACATCACTGCTGAAGAAGAAGAGGAAGAAGTGGAAAGTCTTAAAAGCATTCGGAAGTACCTGACCTCCAATGTGGCTTATGGGTCTACAGGCATTCGGGACGTG
ZNF37BP	CEP164P1	AAGCAAAACTGTGAAAAAATAAACAACTTACCTGGGATGTGATCATATTCCACTAGTGTTGGCAGAGCAGAGAAAACCGAGAGGGTGTAGCTTACAAACAAGAAAAGAACATGAGAAATG	CAGTTATTTTCCCATGCTTGCTGTGCAACTGTAGGTGACTGGTGATTCTTCAGTAAAGGGGAAGATACAACTTATGAAGGCTGCTGCGGTCTTCTTAGCAGCTATTGGGAGGGAAGTGTA
POU2F1	NME7	TCTTTTGGACTTGCAGAGGTGCCTTACTCAGTCTGAATCCAGGGACCCTGAGCGGTGCTCTCAGCCCAGCTCTAATGAGCAACAGTACACTGGCAACTATTCAAGGTCAGTAGAAGCCTT	ACATTCCTCGTGTGTGATTCACTCTTGTCTAAATGTCCCAACCTGTGACTTCTTTACTTTCCACACCACTAATTATCCAAGATCTTGAAGAAGTATTGAACCTGAAACGGAGAAACACAT
NRL	DHRS4-AS1	CCGTCGTGTGACGTTTGCAGCCCGCCGGCCAGGAAGCCGCGAGATGCGTGACGAGCGAAGCGCGTGACGGAGGAGCGGTTGGCCAACGCAGTGGCGGCAGTCGGTGTAAACAAGGCCTCG	ATTGTAAAGATCTTGAAGAAAGGAGACTGTGTCTGTGAGTCCTCAACAAAGCAGACACCTGATTGGAGTTAGGAGTCCAAAGGGTTTATCCGAAGTGGCACCTGTGAAAGGAAAAGGAAG
KPNA1	EEFSEC	AATTTTATCATTGGGTCCATCTGATAGATATGAGAGGGCCCAGCAGGCATCAGCCAGTACATCAGTGTCACTGACAAACAGCAACCAGGAAAGCACATTCAGACATGGAGAAACCTGTAA	ATGCAGACCCAGTCAGCGGAATGCCTTGTGATCGGCCAGATTGCCTGCCAGAAGCTGGTCGTGGTGCTGAACAAAATAGACCTCTTACCTGAAGGAAAGAGACAGGCAGCAATTGATAAA
NOM1	MNX1-AS2	CATCCGGAGAAACATATTCTGCACAATAATGACAAGTGAAGATTTTTTGGATGCTTTTGAAAAGCTTCTGAAGTAAGCATTTGTGTGCACATTTTGACCTATTAATGAGATGCTGTAAAA	CTCCACAGGAGCCGGCTTTGGTAGCAGTGGATTGACCCAGAGGCAAGAGGAGAACTGAGGCCAGTCGGGGGCCAGGAAGGGAGGTTCCGGGAAGCCCAGGAGTTGAAGGCTGCAGTGAGC
EFTUD2	KIF18B	ATGTTCAGCTTCAGCTCCTCCTTCGTCAGGTGGATGCCAAGCTCGTCTAGGGTCCGTGGGAGGCTGGTGTCCACGTCACCTACAACCTGTGAGGGTGTAAGACACCATGTCAGCTGTAGT	TAGGGTCTCAAACTCTGTGATCATGTCGGGCGTCAGGAGGTTGGCTGCTTGGAGCAGGGAGTACTGCCGCTGGGCAACGCACAGCACCTTTAGGGCCAACCTGGAACAGAAGAAAGGGGA
OSBPL9	RP11-191G24.1	AATGTATAATCTTTTATTCCAGCCCGTGATGCTGATGAGCGAGAGAAGTGGATCCATGCCTTAGAAGAAACAATTCTTCGACATACTCTCCAGCTTCAAGTAAGGGTCTTTACATGGTTT	TGATTTCCCTTTATCCCTAGAAGCACCTCCAAGGATCACGTAGGACCAGCAGAAGCAGCGTAAAGTATTGGAACTTTGAATCTGACATCAGAAAGACCTGCACTCAGCCGGGCACGGTGG
MFSD3	MROH1	CCCAGGGTCAGCCTTGCTGAGCCTATGTCTGCAGCACTTCTTGGGAGGCCTGGTCACCACAGTCACCTTCACTGGGATGATGCGCTGCAGCCAGCTGGCCCCCAGGGCCCTGCAGGTGAG	ATCTGTGTGCCTGTGGAGTCCTCAAGCCCCCTGGTGATGAGTAACCAGAAGGAGGTGCTGCGCTGCTTCACTGTGCTGG
WARS	DEGS2	CCTGACCTGTGTGAGAAGAAGATGCCTCTGCGCAGGAAGTGGTGTGGTCTTTGGCCGGTGGCTCTCTCTATTCGGTTTATTAGCTCTTTGTCAATTTTACTACTTCCAAACCGAACTGGA	ACCAGCCAGCAGGCCAGCATCTGCACCAGCACCAGCACCAGCACCGCCCACTTGAGGCGCGGGTCTGGCCGCATCAGGGCCTTGATGGCCGGGTACTTGGCTGCAAGGAAGACAGGGAGG
HNRNPUL2	AHNAK	TTTCGGCGATTTGTCCGCTTCTCGGAGGGGGGCAGAAGCTTCCTTGCCTCCTCCTTGTACTTAGTGACAATGGGCTGAGCTTCCTCCTTCTCCAGCTCCCCATATGTCACCTCATCCATA	AGCAATATGTAATTTCCCATTTTTAGAACAATGCTCCAAAGAACGGTCACAAAAACAACCTTAAGAGGGGGTGGTTTTCTTCCTGGCCGCTTCTACAGTCCTGTAAAACAACAACAAAGA
CCDC117	CTA-292E10.6	TCCCCAGTCTTGTCCTTTCTGATACCATGAAAACAGGTTTGAAGAGGGAATTTGATGAAGTTTTTACAAAGAAAATGATTGAGTCTATGTAAGTTTTGGTACCTGATTTCTATTTAATTA	CGAGGCTAGCTCTGTCGACTAGTTCAAGACCCCTGAGCGCTTTGGGCCTGAGGTTCCTCAGCTTCCAAGTGAAAGGCTTCGACTTGGCATTCTAAGAGACAATCTCTGTGACCATCAGTT
LDLRAD3	PRR5L	CTCTGTATTGACAAGAGCTTCATCTGCGATGGACAGAATAACTGTCAAGACAACAGTGATGAGGAAAGCTGTGAAAGTTCTCAAGGTAGGAACCTCTCAAGCTCTAAAAAGATAATTGCA	CCCTGGAGAAGCCCTTTCCGAGGGCATTCGGAACCTTCTGGTCCTAGAGGTGAAGCTGAACTGTCACCAGGACTTATGACCCGCGGCTTCGCTCCCATTCTGCCCGTCGAGTTCCACAAG
CASD1	GNG11	ATTTTAGCCTTCATCCTAATAAGAAACATCCCTGGATATGCCCGTTCAGTTTACAGTTCATTTTTTGCTTGGTTTGGAAAAATTTCATTAGAG	AGAGGATCCTCTAGTAAAGGGAATTCCAGAAGACAAGAACCCCTTTAAAGAAAAAGGCAGCTGTGTTATTTCATAAATAACTTGGGAGAAACTGCATCCTAAGTGGAAGAACTAGTTTGT
RP11-85K15.2	BAZ1A	ATGATAATTTTATAACTTTTTTGTATGCAGCTGTTACACGTAGGGCAATCTCTCTGTAAGTAGGGATAAATTACTCTGAAAAAAAAAAAAAAAAGAATCCTAGATAGTTTTCCCTTCAAG	GCGGCTTCTGTCTCACAAACGGCTTTCGGTGTAGCAGCGGCATCTCCCGTCCGCCCGCGGGCTCGCCTGGACCCTCGGCCGCCCGCGCCGGCCCCGCTTCCCTATCAAAATTGGAGGGAA
TBC1D16	AC012354.6	GCTGATGGGCGAGAGGCAGAAGGGCGAGGAGAAGGTGTCTGAGTCTGAGTCAAAGGAGCTGTCTCTGCTCACGCCCTCGGCTGACAGTTCCAAAGAGCCATCCTCCTCCCCGGCCTCGGG	AGAGATGGGCCCCTCTTCTTCAGTTGGCCTTGGTAGTCAGGACAGAGGACAGAGGGATATATTGTAACATATATTGTAAAATTTGAGCCACATACACGGGATAAATGACAACGCAAATAA
FOSL2	BRE	GTACCAGGATTATCCCGGGAACTTTGACACCTCGTCCCGGGGCAGCAGCGGCTCTCCTGCGCACGCCGAGTCCTACTCCAGCGGCGGCGGCGGCCAGCAGGTAGGTGCGGGCCCCGGTGC	TGCACTTGGAGGCTCCTCAGCTCTTCATATCCCAGCTTTTCCAGGAGGAGGATGTCTCATTGATTACGTTCCTCAAGTATGCCACCTGCTCACCAACAAG
MANBA	UBE2D3	CCCCGGGCAGCTCCAGCGAGCCGTTCCCATTGCAGATGCTCCAGTTGCCACGCAAGCTGTAACTGAGCTCCGCGGCGGTGGTGCCTGCACCGCACAGCGCGAGCAGCAGGAGCAGGTGGA	TATCATCCCCAACTGGACCTGCAGAACATTGTGCTGGAGGGTCACGGGCCAAATCACTAAGTTC
SMDT1	NDUFA6-AS1	GCGATGTCTCCGCCGCATGGAGCGGCTCAGGCCGGAGCCTGGTACCGTCGAGGTCAGTCATCGTTACCCGCAGCGGCGCCATTTTGCCCAAACCGGTGAAAGTGAGTGTCCTCCTGGAGA	CTCTTATTCCTCCTGCAGGTCACGACCCCCAGGAGACCTGGAGGACTGAATGCTGCTGCCCCCAAGGAGGAGGCTGCTGTCTTATCCCAGGAGGGAGAGCAGGTGAAGTCCCCAGGGGAG
RP11-680G10.1	GSE1	GGAGACCCTGCCCAGAGGCCCCAGGATGGCCCAGGAGCTGAGGCCAGCACAGTGTCTGCAGAGCAGCCGGGAGGAGGACGGACCAGACCTTACTGGTGCAGGTAGACGCCAGCTCTTTTT	ACCAGGACCACCGCCACCGTCAACCCCCTCACCCCCTCGCCGCTCAATGGCGCCCTGGTGCCCAGCGGCAGCCCCGCCACCAGCAGCGCGCTGTCGGCCCAGGCCGCGCCATCCTCCAGC
CNPY3	GNMT	GGACTTGCGGTTAATCGAAGTCACTGAGACCATTTGCAAGAGGCTCCTGGATTATAGCCTGCACAAGGAGAGGACCGGCAGCAATCGATTTGCCAAG	ATGCCAGTGACAAGATGCTGAAGTATGCACTTAAGGAGCGCTGGAACCGGCGGCACGAGCCCGCCTTCGACAAGTGGGGTATGCAGGTCTAGCCAGGCTCCCCCAGCCCAGTCACCAGGA
CNPY3	RP3-475N16.1	GTGTGATGTGCTGGTGGAAGAGTTTGAGGAGGTGATCGAGGACTGGTACAGGAACCACCAGGAGGAAGACCTGACTGAATTCCTCTGCGCCAACCACGTGCTGAAGGGAAAAGACACCAG	AGAACCACGAGGGCTGATGGACAGACCACAAGGCCAGTTTGTTCCAGTTCAATGATTAAAAGAACCACAGATGACCAGGCACGGTGGCTCACGCCTGTAATCCCAGCACTTTGGGAGCCC
GNA12	CARD11	GGTCGAACTCGCGGCCGTGGATGATGCGCATCTGCTTGAGGAACGTGGACTTGCCGCTCTCGCCCGCGCCCAGCAGCAGGATCTTCACCAGGCGCCGGACCGCGCGCCGCTCGCGGGCCA	CTGGCATGGAGGGGTGCTCACACACAGGGGCTGCTATCCCGCCATTGGGGTGTGACTTCTACACTTTCCGGCTGGATCTTGTCGTCCCTTGAGCCAGGCTCCCGTTGCATCTGGACTTGC
RBM14	C11orf80	AAGATTTTCGTGGGCAATGTGTCGGCTGCATGCACGAGCCAGGAACTGCGCAGCCTCTTCGAGCGCCGCGGACGCGTCATCGAGTGTGACGTGGTGAAAGGTAACGCGGAGGCGCGCTCG	TTGCTTCTGCAGGAAGCCTTTTTGGTGGCATGGTCCTCAAGAAGTTCCTAAAAG
FARS2	RP3-380B8.4	TCTGAGAATTACGCAGAAAATGATTTCTATGACTTAGTCCGAACAATTGGAGGAGACCTGGTGGAAAAGGTTGATCTCATAGACAAGTTTGTACATCCAAAGTAAGTGAAAAGCTTTCTG	AATAAAGGAATATGTCTTTTTAGGTCCCTTCCTCTCTCCAGCTGTCTGGAATGGAGCCGCCATGTCTGGTGCTCAAGCGGCCAGCTCTGACCCAGAGGTAACACGTTATGGATTGTGGAG
FSD1L	SLC44A1	TTTCCCTAGAGTCAGATTAGTCAATGTAATAATGCCCTGGAGAACTCTGAAGAACTATTAGAATTTGCAACAAGGTCATTAGATATAAAGGAACCTGAAGAATTTTCAAAGGTACACAAA	AGGTTGTTTACATGAGGTTCTCCCACTCACCAGCTGTTGAGAGTCTGCGATTATGAAGAGCAGGATCTTATTACTTCAATGAAAGCATGTAACAAGTTTCTCAAACCACCAACAGCCAAG
SIK1	CBS	AGGTCCCGGTGGACGATGTGATGGTCGTGACAGTACTCCACGGCCGACAGGATTTGCCAGAACTTCTTCCGCGCCTCGTTCTCACTCAGGTGCCCGTTGGAAGTCAAATAATCTGAGGAG	GACTCTTCTCTCTTTTGCCTTTAATCCACTCTGCGCAGTCATTGCCTGTGTTCATCCTACCTGGCCGACTTCTCTCTCAATATTTCCTTGGTGAAACATCCTAAGAGGAAGTTACATTAG
PALLD	TSC22D1	ATCATAGCAGAGGCCTTTGAGGACGACACAGGTCGCTACACCTGTTTGGCTACGAATCCCAGCGGCTCAGACACAACATCTGCTGAGGTGTTCATTGAAGGTAAGGAGGGGTGCCTGGTA	GCTCCAGCTGGGAATTTTTCTCTATTAGTTCTTTGATTTGCTCTTTGAGGACCTCCACTTCTTCTCTGACCGCATACATCAAATGGCTTTTCACTAGATCCTGGAAAGAAGACAGAAAAG
PKD1P5	DOT1L	TGAGAGCTTGAAGACCGCCGCGCTCTGATAAATGACATTGAAGACCACGTTCTGGAAGGTCAGGGACTGCTTGTCGTTGATGGTCCACCGGAAGACCATGTCCGAGCCGGCCTCCACCAC	ACCAACTCGCGCCCGCGGCATGGTGCCCGCCGGCCTGCCGGGCTCCCACCCCTGGACGGCAGAGGCAAGGACGGACGGGAGCTCCACTGTGAATCGGCGGCACGCGCCGCAGGAGGCTGG
EIF4A2	PRPF40A	CATGGTGACATGGACCAGAAGGAGAGAGATGTTATCATGAGGGAATTCCGGTCAGGGTCAAGTCGTGTTCTGATCACTACTGACTTGTTG	CGGTAAGGCAGGCTGCATGGAAGCCTGAGACATATGAGACATCATCATTCCAGGCATTACTGACGACATCATTCCAGGCAT
DHX36	MATN1-AS1	CTACAGCAATAGTTTCCTGATCGTTATCCTTCTGGATGGAAATGTCACCTCCAAAAAACAAGAGACAGTATGGGGAAACCTCTGTGCAGTCATACAAGTATATCTGTAATGAAAATTAAA	ATGCACGAAGGGGCCTTCTGCAAGGTTGCTCACAAGTCAAACAGGCAGCTGTGAAGGGCTCTGCTGTTCCCTCCTCCTGTTTTCACATCCCTCGGGCTTCCAGAAACTTAAAGCCGTTAG
POLR2J3	TRO	GAAAAGAGGTTTAATTGACTCACAGTTCTGCAGGCTGTACAGGAAGCGTGGCTGGGGAGGCCTCAGGAAACTGACAATCACGGCAGAAGGCGAAGGGGAAGCAGGCACGTCTGGCCATGT	AAGGTACCTGGAGTACAAGAGGGTCCCTAACAGCAGACCACCTGAATATGAGTTCTTCTGGGGCTTGCGCTCCTACCACGAGACTAGCAAGATGAAAGTCCTCAAGTTTGCATGCAGGGT
TRMT10B	ASNS	AAGATGGACTTCCTGAAGGCTTCCAGCTTCTGCAGATCGATGCGGAAGGCGAGTGCCAGGAGGGAGAGATCCTGGCCACAGGCAGTACGGCATGGTGCTCGGTGAGTGCGTGAATTGCCT	TAATGGCGTTCAAAGACTTGACGGTAGTAATATCCTTCTTTGGTTTTAGGAGTATTGAAGGGAAATTTCTGGGCTGCATTTGCCATCATTGCATCATCAACCTGTAAGAATAAGCATATA
FBXL8	PCBP1-AS1	GCCACCTGTCCCTGAGAGACCGTGCTGCCGCCGCCAGGGTCTGCAGGGCCTGGGCCGCCGCTGCTACCTGCAGCGCCGTGTGGCACGACACAAAAATCAGGTGAGCCTGCTCCTCCACAC	ATGACTTACCTAAGGTCACACAGTTAGTAAATGGCTGAGTCAGAATTCAGCCCCTAGCAGGCTGGCTCCAAAGTCACATTCTTAACCACTGTGTTACAAGACCACGTCTCACCTGTCAGA
NABP1	INTS10	GCAGATAAAACGGGCAGCATCACTATTTCCGTGTGGGATGAGATCGGAGGTCTTATACAGCCAGGGGATATTATTCGGTTGACCAGAGGGTAGGTGTGCAAAAAAGTCGGGGGACCTAAC	CTTTAGATGACATGTGAAAAAGTCCTTGATTTGATGTGCTACATGGTACTCCCCATTCAAGATGGAGGCAAATCCCAGGAGGAACCCTCGAAAGTAAAGCCCAAATTTAGAAAAGGTACA
MBNL2	ENAH	AGTTTCTTTCTCATGATGCGGTGGAGAAGCCTCGGCCACTTGGTTCTGCCAGATGTTCCTGGGGTTACTGTAAATGGGAAGGACAGGCAGAGCTAAACAAGGTAGGAGAATCGCCCCCCT	GAACTCTGCTGAATCCAGTTGAGCCACCAGCTGGCACCCACTTCTTATTGGCATCATCATAAACCATCACAGCAGCTCTTGCCTGACAGATACTCTGTTCACTGTAAAAAATAAAATAAA
FOSL2	TOMM70A	TGTACCAGGATTATCCCGGGAACTTTGACACCTCGTCCCGGGGCAGCAGCGGCTCTCCTGCGCACGCCGAGTCCTACTCCAGCGGCGGCGGCGGCCAGCAGGTAGGTGCGGGCCCCGGTG	ACCTGGGCGTATAGTGCATAGCCTTCGGCACACCTTGGAAATTTCTTTATGACCTCTTCAAAACCTTTCATAGCTGCTTGGATTTGTGAAGAGTTGTTTCCCGTATATGCCTGGCGGTAC
TPT1-AS1	FRYL	CAATTTCAGATCTTCACTTCAGGTCAGCTCCAAGGAGGCTATCCTTGCCCATCTTCCTAAAATAGAGCTCTCAAAACCTGGCTGTTTTCCTTCAGAGCACTGGCCTCCAATTGTAAGTAG	GGCATTTCAGTTTCTTCTAAATCAAGAATTCCTTGACACACAAGAGATTCCTGCTGTTCTTGAATTATATAGGATCCTTCATCTTCAAAGGTTGTAACATGTTCCTCCTTTAATACTGAA
HNRNPR	KPNA2	TACCTCCGTTCCAATTCCAGGTTGCACGCCAGAGTACACACTGTCTGGTGGAGGACCACCATACTTCCTCTGTCCTGTGGTTACATCCAGAGTATAACCAGTTCTCTCAAGCAAGGCCTA	CCTTTTTTTTCAGGTGATGGCTCAGTGTTCCGAGACTTGGTTATTAAGTACGGTGCAGTTGACCCACTGTTGGCTCTCCTTGCAGTTCCTGATATGTCATCTTTAGCAGTAAGTTACTAA
LZIC	RAC1	TCTTACCTGCATTCCTCCAGATCTTGTAATTGTTGCATGAGTCTATCCAACTGTTCTTCTAAATTCTGCTTTAATTTGCTTGTCTCTGTCTTTCCTCTGGAAGCCATTTTAATCTCTATG	GCTTTGACAATTATTCTGCCAATGTTATGGTAGATGGAAAACCGGTGAATCTGGGCTTATGGGATACAGCTGGACAAGAAGATTATGACAGATTACGCCCCCTATCCTATCCGCAAACAG
PCNXL2	ODC1	ATTTGGCTTTTCTTCCTTTCTGGAGGGCTTTTGCTGAATTACTTCTCCTTTGTCAAACATGAGGTGTAGGCGATAACTGACCAGTTTGATTATTGTGAAGAATATAGTCACTGCACTGCA	CATCCCACTCTCCCAGGCACAAGACACAGGCAGGGTGCTGGCATCCTGTTCCTCTACTTCGGGTGGGAAGTCGGGGTTCTGGAATTGCTGCATGAGTTGCCTGAGAAAGAAAAAGTGGCA
RP11-193F5.4	HMGN2	CCTTCTTTGCAGGGGCCTTTTTAGGCTTGGGCTCTGGCTTTGGAGGAGCAGGTTTAGCAGACAACCTCGCAGATCTTCTCTGTGATTCATCCTTCACCTTGGCTTTATCTCCTTTAGCAT	CGCGCCGCTGCATCCCGCGTCCAGCACCTACGTCCCGCTGCCGTCGCCGCCGCCACCATGCCCAAGAGAAAGGTACGTGGCGCGAGGGCCCCAGGCGCCGGGCCACCACTGCCGCCACCG
RPL4	PFDN5	AGGATACGTTTCCAAAAGCACCCTGGCCAGAGCGGTGAGTCCCACCACCTCGAACTCTGGGAATTCGAGCCACAGCTCTGCCAGTACCCCAAGACTCAGCACTAGTCTGATGACCTAAAA	ATGTATGTCCCTGGGAAGCTGCATGATGTGGAACACGTGCTCATCGATGTGGGAACTGGGTACTATGTAGAGAAG
BCL2L2-PABPN1	RPL30	TTTCCACGAGCCCGCTACCGCGCCCGGACCACCAACTACAACAGCTCCCGCTCTCGATTCTACAGTGGTTTTAACAGCAGGCCCCGGGGTCGCGTCTACAGGTCAGGATAGATGGGCTGC	GTTTGCAGGTGAAATTTTGTAGGTGAAAAGGTTTACTTTTCACCAGTCTGTTCTGGCATGCTTCTAATGATGTCAGAGTCACCTAAAAAATAAAAATAAAAAAACAGTAATTTTACAATT
DAP3	CMC4	TGCTGCTCACCTAGATAACCAGGTTCCAGTTGAGAGTCCGAGAGCTATTTCCCGCACCAATGAGAATGACCCGGTGAGTTACTAATATGTATATGGGGTTTCTCAGGGCTTATGATTTGT	CTTGTAAACATTTCTGTATCTCACAGGCTTGCTTCTGGCACGGATCCTTCTGCGGCATATCCAGAAAA
ANP32B	PTMS	GAAGGAGAAGATGAGGAAGACGAGGACGATGAGGATGGTGAAGAAGAGGAGTTTGATGAAGAAGATGATGAAGATGAAGATGTAGAAGGGGATGAGGACGACGATGAAGTCAGTGAGGAG	TCCACAGGATGAAGCGGATCCCAAACGGCAGAAGACAGAAAATGGGGCATCGGCGTGAGCCCCTGCCAACAGGCTGGGGTTGGGAGGCCTCTCTGGGCCTGGAGGTGGGGGTGGGGGCAG
ATP2A2	RBM39	AATGGGCAAAGTGTATCGACAGGACAGAAAGAGTGTGCAGCGGATTAAAGCTAAAGACATAGTTCCTGGTGATATTGTAGAAATTGCTGGTGAGTTGAGTTTGTCATTTTTCTTTTATTC	GCCGCCGCCGCTTCTGTTGCTACTGTTAAGCCCCTAGGCCCAGGCCGCGGAACCGCCCAGCCCGAATATCGGGTTCCAAGGACGGCTAGGCCCGAGAGAATCTAAAAAAAACAATGGAAT
BCL2L11	LCMT1	TATTCGGTTCGCTGCGTTCCCGCCGCCACCGCCTCGGCGCCCTTTCTTGGCCCTTGTTCCCCCAAATGTCTGACTCTGACTCTCGGACTGAGAAACGCAAGGTAAATACCTCCAAATCCC	ATTGCCAACACTCCTGATAGCTGAATGTGTGCTGGTTTACATGACTCCAGAGCAGTCCGCAAACCTCCTGAAGTGGGCAGCCAACAGTTTTGAGAGAGCCATGTTCATAAACTACGAACA
CLCN6	CRNDE	AAGGCTCCCTCTGCGGATCTGTTTTTCTAGACCATCCTTGGAGAAACACAGGAGGAGGAGGATGAGATTCTTCCAAGGAAAGACTATGAGGTGAGCTCCTTTGATACTGCTTGGGCAACT	CTTGGGATGAATTTCAGCCAACATTTGGAGGAACCCCTTAGTTCAGAAGTGAACTTAGCTGACAGCATCCAAATGTATTATGGAAGCATCACACTTAACACCTGCACCGAAAATGGAAAT
CPSF6	SKP2	ACGATTATTACAGAGAGAGAAGCAGAGAACGAGAGAGGCACCGGGATCGTGACCGAGACCGTGACCGAGAGCGTGACCGAGAGCGCGAATATCGTCATCGTTAGAAGGTGGGTATTCCTT	GCCCTCAAACATACAGAACTTCCAAACTCAAGTCCAGCCATAAGCTATTTTGCCAACATGTCAGAGTAATCTGTATTTTTGTATGTGATTTCTACTTTTATAGACTTGTTTTAAAACAAT
NKTR	MED23	AAACATAAGAGGAGGCCAAAAGTTAAACGTTCTAAAAAGAGGCGAAAGGAAGCAAGCAGTTCAGAAGAGCCAAGGAATAAACATGCAATGAACCCAAAAGGGTACGTGTAAAACACCAAT	GTCTAAATTACCTCTCTTGCTGCCAGAAGCTGCTGTACAACAGCAGAGCTCACTGTATTAGGAATTGTCAAAATCTTCTCCAAAATCACTTTTAAGAGATCTCGAACACCCTGATATAAG
RNGTT	ZC3H13	ATTTTATAAATTATAGGTACTTACATTGAATTTAATTATGTCATATATCAAATATCTAGGAACAGCCTGTCCATTTACTCTGTCAATAATCATCTCCTTGAAAGAGAAAAGAAGGTAAGT	CTGCTTACTTTTATCATCTCCACTGTTGTAGGCATCACTGTCCGGAGAATGTTCACGCCGGCGCTTCGGGGACTGTCTAGGGCTGGGACTCCCTTCATTTCTATAGCGCTTCCTAAATTG
SOS2	PEX11A	ACCTTCAATTTAAGTTTACCTGAAAGTGTAGAGCAACTGCAGGTCTGGCCATCAATTTATTGAAATGTTCATGAAACTCTGGTGAAAGAATGTCCTGTGATAATGTTTCATAAGGATCAA	ACATTTACGACCAGTGCTCACACTGGACTCCAGTTTCTTGAGCTTCATTACCACCTTCTCTTTGCCAGCTTTGGGCTCTAACAAATATCTAAGCAACATGCATGTGTACTGAGTGGCTCT
UQCRC2	RPL37	CAACTTTTCTTATCTGTCCTAGGTTATCAAGGCTGCCTATAATCAAGTAAAAACAATAGCTCAAGGAAACCTTTCCAACACAGATGTCCAAGCTGCCAAGTAAGTCTCAGTATTAACTGT	ACAGGTGTGCACCACCAGGCCTGGCCAGTCCTTCCATTCTTAGTTCTTGAGGTTATGCAGTGTCTTTGCCCTGTGCTTCTCTTGTATTATGATCCAAACTCCTTTGTTTAAAAAAAAATA
CTSA	TIAL1	CTTTCTGGTAAACTTACAGTACCGCCGTCTCTACCGAAGCATGAACTCCCAGTATCTGAAGCTGCTTAGCTCACAG	CGGTACTTGCCACCCATTTGCCATATACTGTCCATACTGTTGTGGGTTTCCATACACTTGGCTCCATTGGCCCCATTGACTATAGTCAACCTAGGAAAAAGCAAAGTATTGTTTTAGGGA
DUSP16	ANAPC11	GGGTTGGCCCAATGTTGGCAACAGGTAAGCAAGGCTGAGAAATGCAGGTAGGGACTAGAGTGGATTTTCCTTCACAGAGGCCAGGGAAACAACGAGAGAACTCAGCAAACCCACCTAAGA	TGCGGCTAATTTTTTTGTATTTTTTGTAGAGACGGAGTTTCGTCATGTTGGCCAGGCCCATTTGAGATCTTTGAAGATATCCTCAACGTGAGGTAAAACCAAACTCCTGACTGTCCTGTG
EXOSC2	UBL5	GTAATGTCATTTCTTTGTGTATTTCAGAGGAGAAGATCTGCAGAAGATGAGCTTGCAATGAGAGGTTTCTTACAGGAAGGGGACCTTATCAGTGTATCCTGCGCTTTGCACTCCAGCCTC	TAACTGCTCTGCGCCCAGCACGGATGATACCATCGGGGACCTTAAGAAGCTGATTGCAGCCCAAACTGGTACCCGTTGGAACAAGATTGTCCTGAAGAAGTGGTGAGTGCAGCGGTAGAG
HIST1H2AC	RP11-200A1.1	GAAACGCTATCAAACCCAAAGGCTCTTTTCAGAGCCCCCCTACCGTTTCAAAGGAAGAGCTAACCTCACTGCTTGTAGGTAGAAGGAAAAAAGGCACTAAGGTAAGTTAATTTTATGCCA	AGCTCTTGTCCCACCTGCCCCAACCCTCGAGCCCTGCTTCCCAGGTCCGCATTCCCAGGCAGCCTGCCACAGCCAGTGCCAGCGAGAGAGTGGATCAGGCTTCAGGATAGCCCAGCACTG
IARS	TOX4	CACTCTGGTGAGCATATCTTGTAACTATATCTTTAATTGTACCCGCAAGTATATGTCCATAGTGAGGCAGTCCAGTTGCAAAAGGAGGACCATCATAGAAGGTAAATCTAACAGGTAATA	GTATATAAGAGGAAAACTGAGGCTGCCAAGAAAGAGTATCTGAAGGCACTGGCTGCTTACAAAGACAACCAGGAGTGTCAG
LEMD1	RPL30	GTAGTATTGGGCCAGGTGAAAATCCAAGCTTCTCAAGTTGGTTCTGCAATTTACAGTCACTCAGACACTTCACATCCACCATGATGATAGAAGTTTGGCCTCTTTTCTGATGGTAGAATC	GTTTGCAGGTGAAATTTTGTAGGTGAAAAGGTTTACTTTTCACCAGTCTGTTCTGGCATGCTTCTAATGATGTCAGAGTCACCTAAAAAATAAAAATAAAAAAACAGTAATTTTACAATT
MAPK9	OGFOD3	CGTGTCACCACGTAAGGGGTCATCATGAAGTTAGTGCACGCTGTCCGGGCCAGGCCAAAGTCAAGGATCTTCAGGGTGCAGTCTGATTTCACAACAATGTTGCTAGGCTTCAAATCCTAG	CACTGAGGTCATGCTGCAGCACTCACCTGTACAGGTTCACAAAGTGCTTCCCGACAGACAGGGCCCCTGAGTGCAAGTCCAGAATGGATGCCTGGAAAAGACGTTGTGGAGTAAAGCGTG
PCBD2	NOL10	TGACCTTAAAGCAGCAGGATGGTCGGAATTAAGTGAGAGAGATGCCATCTACAAAGAATTCTCCTTCCACAATTTTAATCAGGTAATTGTTATAAATTCTTGCTAGGGCTGTGGTCTATT	GTGCTTTCTGGATTCTCTTCTAATTCTTCGGTCAAGTTGTCTAAGAAGGAACACCACCGAGGAGCAGGACCCAAAACCTGTTGGTGTTTATGAGAAGGTCAGCAAAGGCACAGTTTACCA
PCMTD1	POM121C	AATACTTACTTATCAAAGCTATCACTATTTTTGATGAAGCTCTCCAGTTTTTCCTTGGCATATTCCACCACATCTGAATGAAGCTCAATCCCATGATTTATTCCAAAAGGACCTGCAATC	CACTGTGGGAAGTACCCCCGGACAGGAATACTGGGTCTGATGGATCGGATAGCGTCTTCGAGGTGTTATTACAAACCGATCTGGTAAAGTCCCACGATCCCTGCAGAGAATGCGAGACAA
PNISR	KLHDC1	TTGTTTGGACCAGATTCCATTGTAGACATATCTTGTCCATTTGGCATCATTCCTGGTGGTTGTTCTACCATGCTTTGCTGTCCTGAAGCTTCTCTTTGGGCAATCCAAGCTTGGGCCAAT	TCTATTGAAGACAATGAAGTATATTTGCCTAATGATGAAATTTGGACCTATGATATTGATAGTGGGTTGTG
RAB10	MXI1	TTTCAAGCTGCTCCTGATCGGGGATTCCGGAGTGGGGAAGACCTGCGTCCTTTTTCGTTTTTCGGATGATGCCTTCAATACTACCTTTATTTCCACCATAGGTAAGACCTGTGGGAGGAC	CTGCAGCATTCAAAGCCCCCACGGAGGTTGAGCCGGGCACAGAAACACAGCAGCGGGAGCAGCAACACCAGCACTGCCAACAGGTAGCAAGCTGGGAACGCTTAGAAGAGGGAACTGGAG
SIRPA	VPRBP	CCCAGCAGATGCCGGCACCTACTACTGTGTGAAGTTCCGGAAAGGGAGCCCCGATGACGTGGAGTTTAAGTCTGGAGCAGGCACTGAGCTGTCTGTGCGCGGTGAGTACAGCGTGGGCCT	ACTCAGTTTCTCGCCTGCCAAGAATCTCTTCCAAGCAGTGATGGCTCCTCACTCATTCAGAGATAAGATGATGTCATCTTCCAAATCAGAGTTGTCAGAGCTGTCAGCTGAAAGGGAAGA
TJAP1	PLOD3	GAGCGGTACCGGCTGGACTGCAACCTGGCTGTACAGCTCCTCAAGTGCAACAAGTCCCACTTCCGAAACCACAAGTTTGCCGAT	ATGAGTCGTGGTGTGGCCGCAGAGACGGCTGCTCGTCTGGCCGGTAGCGAACCACAAAGTTCATCACCGCCCGCGCCTGGGGGAGAGGAGGGAAGAGGCTGCAGGGACAGCTGCGGGCGC
TOP2A	GLRX5	TTCAGTTTAGCAGATTCAGCACCAAGCATTCCTAGGAGCCATTCTTTTCTTAATCCATAATATTTAAGTCTGAGTTCAAAAAAGTCTCTTAGAATATCCAACACCGTGTCATATTTCTTT	GGCGAGTTTGTAGGGGGCTGTGACATTCTTCTGCAGATGCACCAGAATGGGGACTTGGTGGAAGAACTGAAAAAGCTGGGGATCCACTCCGCCCTTTTAGATGAAAAGAAAGACCAAGAC
ZFR	ZMYM5	CAAGAGATGCAGGTGTGACTGGTTCTGACACTGTGTCTTGCTTTACTTCAGGAATCTGCACAGCAGAAGTGACAGGAGTACTTTTAACACATTCGGTTCCTTTTATGTCTTCTGCTTTAT	CTGGAAATTCTGCTTACGAAGTAAGGCCACTGGTGATAAAGAATCCACCCCTGGCTGTTTCTGATTACTGGGAAATGAAGCTGACTGGGAGATCCAAGAATCTTAAAAATGAAACAAGAA
COMMD1	RP11-390P2.4	CAGAGGTAGAAGAAAGTATCAGCACACTGATCAGCCAGCCTAACTGAAGATGATGTATGAAGGAGTTGGAGTTGTTGAAACCAAGGTGTCCATGATCCCTCCCCACTGACCTTTTCTAAG	TCACCCTCCCACAGCCCACTTGCTAGCAGGCAAGAGAGGGGTGGAGGCCGGCAGTAAGGCATGTACTGAACTGGACCTCTGGTGGAATGGGTCACCCACGCTGGGCTTGGTGGGTATTTG
FNDC3B	RBM39	AATTAATGTGTTGTTTTGGCAGGTTATTCTCGTTCAAGTTAATCCAGGTGAGACTTTCACAATAAGAGCAGAGGATGGAACACTTCAGTGCATTCAAGGTAAGGACATTTTTGGTAAATA	TAGAAAAGATTCAATTCCTACCTGCCACAGCACCAAATGCCAAAGAGCCACTCATCTGTAGAGCTTGCTGTGCTGCTGGCGGAATCTGCAAACCTGTACCTGTAAAAGAATAGTCTTAAA
IQGAP1	RPL30	TATGTTGTAGCTGTCCTGGATAATGAAAGACTTACTGCAGAGGAGATGGATGAAAGGAGACGTCAGAACGTGGCTTATGAGTACCTTTGTCATTTGGAAGAAGCGAAGAGGTAAAGATTG	GAATCGTCTTCCGGGCCTGGCCCGCCTCACTCACCGTCTTCTTTGCGGCCACCATCTTCCTGCCTTAGGAGCGGGACGGCCCCCAACCTAGAAGAGACAGAGAACAGGACAGGAATTTTA
NAA15	PLK1	GGGAACTTCTGTTGCAACTATGTCGTTTGGAAGATGCTGCAGATGTTTATAGAGGATTGCAAGAGAGAAATCCTGAAAACTGGGCCTATTACAAAGGCTTGGAAAAAGCACTCAAGCCAG	CGCCTCATCCTCTACAATGATGGTGACAGCCTGCAGTACATAGAGCGTGACGGCACTGAGTCCTACCTCACCGTGAGTTCCCATCCCAACTCCTTGATGAAGAAGGTGAGTGCCGTCCGG
NEK7	CMC2	CTCAGCAACTCAACCATCCAAATGTAATAAAATATTATGCATCATTCATTGAAGATAATGAACTAAACATAGTTTTGGAACTAGCAGATGCTGGCGACCTATCCAGAATGATCAAGGTAA	ACAATTTATTTTTCGGATTCCTCTGGAGGATTAAAAAGTTTCTTTCGCATTGCAATGCCATGCTCCCTGCTCTTGGTCCTGTTTTCTACGTACTGAAAAATAAAAGAAGGGGGGGAGAAA
RNF145	PLOD2	TCTTACCTGGAAATTTGATGTCCAGCATAGAGGAGCAGAGCAGTCAAAAAATATAGATAAAGCTGAACCAGATGCTGCCTGGGCAATGTTAGCAGCACCACACTTAAGATATAACCTGTA	AGGATATACCATACCTTCACAGTATAATTGAAATATTTGGCTGACTGCATAAATCGATGGAATCCATCACTTTCTTTTGTTGCTACAGTTATGACTAATAATTTATCTGCAAAGACAAAA
TOX2	POLR1D	CTCAGGCCGCCATCAAGGGTCAGAACCCCAGTGCCACTTTCGGTGACGTGTCCAAAATCGTGGCCTCCATGTGGGACAGCCTGGGAGAGGAACAGAAGCAGGTGAGCCTCCCTCTCTTTC	CAAATCTTTTCCTTTTTCTTATCAGGAAAGCAATAGAAGAACTGCTTAAGGAGGCAAAACGTGGGAAAACTAGAGCTGAAACAATGGGACCCATGGGTTGGTAAGTTCTTTGAGTAATCT
ZNF521	RAB28	GTTTAGAGTGTCACTCACCAATCATGTGATTTGCAACATGAACCTGAATATCCCATTCATTGTAGAAAACCATCTGACACTTGATGCATTGATAGGTCTTCTTCTGAGAAAACAAGTATA	TTACTTACAGAGTCTCCTGTCTTGGCTGAGACAAAGTGGCTACTAAAACCATTTTCCTGGCAAAACCGTAAGTGTTTTTCAGGTTTTATTGTTCGCATATGCTCCAAATCAACTAGAAAG
AGPAT5	CTD-2541M15.1	CCTTCCTGCCCGCCCGCTTCTACCAAGCGCTGGACGACCGGCTCTACTGCGTCTACCAGAGCATGGTGCTCTTCTTCTTCGAGAATTACACCGGGGTCCAGGTGAGCCGCCTCCCGCTCC	AAGAGGTTCTCATTTCTTTGGTTCTAGAGAACAGCCGCAAAATGTCAAATCCTCTAGTCTTTCTGACCAGCTGGATGCCATAGTTGTTGACAGACTGCTGCCTAGAAGTAAAAGAATTCA
ERO1A	FERMT2	CATCAGCTTCACAGAAGTTATCTGAAGAATCATCATGCTTGGTCCACTGAAGAACAGCCTTCTGTGTTTCCTCA	CCAAACCAAGCAGAAGTTGGTGACAAGGGGCTTCCATCATGAGCATCATAAGTGGGGGTCATTGTTTTACTATACAGTCCTGGGCTTGAATATATACTTCCTAATAAGTAACATGAAAAA
CD109	EEF1A1	TTAGGATCTCTGTGACACAGCCTGACTCCATAGTTGGGATTGTAGCTGTTGACAAAAGTGTGAATCTGATGAATGCCTCTAATGATATTACAATGGAAAATGTGAGTTTAGCTATTTTTT	GTCTCAAATTTCCACAAGGAGATATCAATGGTGATACCACGTTCACGCTCAGCTTTCAGTTTATCCAAGACCCAGGCATACTTGAAGGAGCCCTTTCCCATCTGTAAGGATTAAGAGTCG
SUCO	TBX19	GTGGCGGCTGCCGGGAGGATGTGCCGCCTTCTGGCAGGGGGAAGAAGGAGGAGAAGATGAAGAAGCACCGGCGGGCCTTGGCCCTGGTCTCCTGCCTCTTTCTGTGCTCTCTGGTCTGGT	CCATGTACTCCCTCCTGCTGGACTTTGTCCCTACGGACAGTCACCGCTGGAAGTACGTCAACGGGGAATGGGTGCCCGCTGGCAAGCCAGAGGTCTCCAGCCACAGCTGCGTCTACATTC
ZC3H8	SUCLG1	GTGGTCAACTTAATCTTACTTTTTTGGGAATTTGCTCGCACTCCAGTTTAATTTTCTCTTCTTGTGTTTCTTCAACTTCTGTATCTATTTCATCATCGATTCTGTAGCAAAAATATCAAA	CCTTTTCCTCCAGCAATAATTGCCCCGGCATGACCCATTCTTCTCCCAGGAGGAGCAGTTAAACCAGCAATGAAGGACACTACAGGCTTGGAATTTGGACCCTAGAAAGAAAGTAATATT
ZNF37BP	C10orf25	CTGGGATGTGATCATATTCCACTAGTGTTGGCAGAGCAGAGAAAACCGAGAGGGTGTAG	CATTGGAAGCCAAAAGGCGGAGGAGCTCCCCAGGGAGTGGGGGAACACGGAGGTCAGCTGGTCAGATGACTGAGCACGGCCAGGATGGCTGAGGAGGAGCCTGGAAGGAATAAGAACAAA
SLC30A9	OCIAD1	AGTCATCCATATATTGGTACCCTGAGTCAAGTAAAGTTGTACTCCACAAATGTTCAGAAAGAAGGACAGGGATCACAAACACTCAGAGTGGAAAAAGTACCATCATTTGAAACAGGTATG	GAATACTTTCAAGTCATCCCAAATATGGTTCCATCCCTAAACTTATAC
ADK	VCL	ATGAAGAGTGTAATTTTCGTTTCTGTTATACAGGTATTCTCTGAAACCAAATGACCAAATCTTGGCTGAAGACAAACACAAGGAACTGTAAGTGCATTAAACCATTGGTTGTAAATAGTT	CAGACCCTTACTCAGTGCCTGCTCGAGATTATCTAATTGATGGGTCAAGGGGCATCCTCTCTGGAACATCAGACCTGCTCCTTACCTTCGATGAGGCTGAGGTAGGCAATCTGAGACAAA
AC009403.2	POMZP3	CTTGATTGTTAACTCACGGCACTGGACCTCCAGTTTCATGCCTCTCCACATTGCAGGGTCCTCTACGTTGTTGTATCAGTCACCTTTCTAAAATACAAATCTTACCATGTAAATTGTTTC	CCATGTTTCTGGAGTCATTAGCAAAGTGGAAGACATCCACTGTGAACTGGAGTGTATCTGGCCCGGGTCGAGGAACTTTGAATGCAGAAGAGGCATCAGTGAGACCGTCGACAAGACAGC
RP11-282O18.3	CDK2AP1	CTTCGCCTCTTTTAAAAAGTTTTAAGTTGCTTCCCAATCAGGACAAATACAGAATATGAGGTCCCGTTCCAGCCAATGGAAACCGGACACAGCAGTAGGGTGGACGCATCAGGTTACAAA	AAAGATGGAAATCCTTCAAAACCAACAAGGCAGCTAGGATCTGGCATTCCGTTCCGTTTCTGCCAAGCACTCCCGAACCAGTCCTCTAGCGTGAATGATGCCTGAAACAGAGGCAGAGAC
CAV1	TES	CAACAACAAGGCCATGGCAGACGAGCTGAGCGAGAAGCAAGTGTACGACGCGCACACCAAGGAGATCGACCTGGTCAACCGCGACCCTAAACACCTCAACGATGACGTGGTCAAGGTAAG	CTATAACAATTTCAGCTGGCATGCATCCACAGAGTGCTTTCTGTGCTCTTGCTGCAGCAAATGCCTCATTGGGCAGAAGTTCATGCCAGTAGAAGGGATGGTTTTCTGTTCAGTGGAATG
CLIP4	FAM179A	TTTGCGGAGTCGCTGGACAAACATGAATGCTTTGCATTATGCTGCTTATTTTGATGTCCCTGAACTTATAAGAGTGATTTTGAAAACATCGAAACCAAAAGGCAAGTATTATAAGATCAC	ACTGCCCAGAAATAGCTGCTGCCTCTGGGCAACCTTGTAGGCACCTTCTCCACCCAGGACATGGGCACCCGTGACGATGTCCCCGAAGGTAAGGGGCACCATGGGAGGCCTGCTGCTGGT
MMADHC	EPC2	CCTGCAGTCGAAAAGGCTTTGGGATTGACAACCCTTTTAACTAAAGAGCAAAATCCTGGGAGATAGGAAACCAGTCTGGCTCTGTTACAAAGCACCTAGAAATGACACAAAATTAAAACT	TTTGGATAAGTTGAGGTATAGGCATTGCCTTACAACACTTACAGTCCCAAGAAGATGTATAGGATTTGCAAGGAGGCGAATTGGCAGAGGTGGAAGGTGAAGTATTTGTTTTCACCTGGT
POM121	VKORC1L1	CAAGATATGATATCACCAAGCCAAACGTCATCATTAAGTTGGAGCAGGGAGAGGAGCTGTGGATAACGGGAGGTGAATTTCCATGTCAACATAGTCCAGGTAAGTTAGTAGAGTATCAAA	TACAGATGGGGTCGAGGATTTGGTCTTTTGGGTTCCATTTTTGGAAAGGATGGTGTATTAAACCAGCCAAACAGTGTCTTTGGACTTATATTTTATATACTACAGTTATTACTTGGTAAG
RP11-123O10.4	GRIP1	TCACCTCTCTCCTGCTCCTCTGCCTGCAAGCAGATAGGGATATTCTTCTTCCAGCCGGGCATGGTGTCGCTCCCTGCGCTCGCTGTCGGGCTCGCTCTTTCTCGCTGGCTCTCTTTCTCC	ATCCAACAGTCTGGTCTAACCTGGGATGCTCTGTCTCCTCACAGCCAACGCTCCATCAGGCGGCTTTGTCTGGCTGGCGGATTTAGTGTAGGGACTCTCATCTGCAAAGGTACAATGAAG
RPF1	PRKACB	GCTCCACCAAAGCCTGTACCCAAGACCATTGACAACCAGCGAGTGTATGATGAAACCACAGTAGACCCTAATGATGAAGAG	CTTTGATGACTATGAAGAAGAAGATATCCGTGTCTCTATAACAGAAAAATGTGCAAAAGAATTTGGTGAATTTTAAAGAGGAACAAGATGACATCTGAGCTCACACTCAGTGTTTGCACT
ST3GAL1	SLA	TGACCCAAGCTCAATGCATTTGCTCACTGCAGCTCTTGGGGGTGTTAATTTCCTCTCATTGACATTTCCAGTTTAGGAAGATGAAATCTGAAAATGGTACCAACTGAAAGAGAAGAGGAG	AAACCCAGTGGGGCCAGGCAGCAGGAGGTACCCTGGGACTGGATGCCTGTGAATGTCACGTGACCTCCTCCAGCTGTTGAGACAGCACGGAATCATGGGAAATGAAAACCTGGGGCCAGA
CCDC122	ENOX1	CTATTATACACCAGTACCGCTGAATCTGCTGACACTAGGGATTACTTCCTTTTCTGGCCAGGCAATGAGATTAGAGTTTCAGGGCA	CATCCCTTTACCTGAGCATGGTGAGCTCTCTCTCCTCCACATATTATAAATACGACATCATGCTGGCAGCAAAGGAC
EIF4H	GPNMB	CCTTTCAATACGGTTCAGGGCGACATAGATGCTATCTTTAAGGATCTCAGCATAAGGAGTGTACGGCTAGTCAGAGACAAAGACACAGATAAATTTAAAGGTGAGTTTGGGGGATTCTTA	ACAGCCAATGTGACACTTGGGCCTCAACTCATGGAAGTGACTGTCTACAGAAGACATGGACGGGCATATGTTCCCATCGCACAAGTGAAAGATGTGTACGTGGTAACAGGTGAGTGGTGT
CTBP2	BUB3	TAACTCACCAATATAAATCTGTCCACAAACTCTATAGTTCACACGATGGGCTGTCCGTCTTTTTAAGGGAATACACCTTCATTGGTTCAAAACCATTTAAGGTGATGAAACCCTGAAAGC	CCGCAGAGTGTTGGTGTGGGACTTACGGAACATGGGTTACGTGCAGCAGCGCAGGGAGTCCAGCCTGAAATACCAGACTCGCTGCATACGAGCGTTTCCAAACAAGCAGGTATTGAACTA
ARSJ	MTHFD2L	GTAGTTCTCCAGTTTAACTCCTTCGGCAGCGAGCTTGTCAAGAGTAGGTGTTTTAATCTCAGATCCGTGGTAACCCACATCTCTAAATCCCTGATCATCCGCTAGGATGAAAATGAGATG	AAGAAATACAGCGAGGTGTGGAATCATGGGTTTCCCTTGGAAACAGAAGACCTCACCTCAGTATAATTTTAGTGGGAGATAACCCAGCAAGCCATACATATGTCAGGAATAAGATAAGAG
ST7	TES	TGGTCTTGGACGTATCTGTGGACCGTGTGGTTCTTCATCGTGCTATTCCTGGTCTACATCCTGCGGGTGCCTTTGAAAATCAACGACAACTTGAGCACAGGTAAGGCCTGGGAGCCGGGC	ATGGGCTTAGGTCACGAGCAAGGATTTGGAGCCCCTTGTTTAAAATGCAAAGAAAAATGTGAAGGATTCGAACTGCACTTCTGGAG
TOP2B	NGLY1	AAGCCGAGTTCCAAACTGACCAATAGGCTGAAGCAAGTTAATGTTGTTACTTCCCACAAAGTTCTGAGCCAAATTCACAATAGTCATCATCAATGCTTGCTATACAACAGAAGAAGGCAG	GGTGTGTTGCCAAGCGACATCACCATCTCCTCTGCTTAATTCTGCTTCCAAAATAACTTCAGTGGCACCAGAAAAATCAGCATAGGAGTGAAGACTGTTATCTGTTAGAGGGAAAAAAAA
ZNF519	RAB31	TTCTGTTGGGCAGGGTCTAGGCATTTCCACTCTTCTGGAGAGAATTCTATGGCCACATCCCTGAATGTTAAGAGTTCCTGGAAACACATATATCAAGTGACAGAGCTCTTAATTTGACTA	GAACTCACCCTTGGCCTCCTTTTTGTTGCAGGCCGCCAGATCCCACCCTTGGACCCCCATGAAAATGGAAACAATGGAACAATCAAAGTTGAGAAGCCAACCATGCAAGCCAGCCGCCGG
BRD1	RP6-109B7.4	TCCAAGCCTGGCCCCGTGGGCAGGGGCTGGCTGTGCTGCTGGCTCAGCTTGTTTCGGAGAAGGGCAATTTCCTTTTTGAGCAGCTTTGCCCGCTTGCTCCGGGAGCCGCTGGACTTCATA	GAAGCACCCCCCTCAGCCTTCTGAGGCTGGACTGTGGGCCAGGGGCTGGCGGAGAAAGCAAGGCAGCAGGAAATTGCCGGCTCCATTCCCATTAGGCGGATCTGGGGAGAAATCAGGAAA
SLC39A11	NSF	GTATGCCTCAATTTCCATTTCTCCTACTACATGCTACTTACCCCTGCAGCAAAGCCAAGACTTCCATCTAAGATCCGCCTCTGAAAATCAAAACAAGATGTTTCAGTTTCCAAGAGACAA	ATCGAGATTGATTTCCTGCAGAAAAAAAGCATTGACTCCAACCCTTATGACACCGACAAGATGGCAGCAGAATTTATTCAGCAATTCAACAACCAGGCCTTCTCAGTGGGACAACAGGTA
ZHX1	MRPL13	AGAGTCTCCGGGCCCGCTGGTCGCGGAGCCGGCTCGCGCCACTACCTGCAGGGGCCGCCGCGCCTCTCAGCGCCACGCCGCCGCCATCTTGCATTTCAAACCGGCTGCACTTTTCAGGGA	CTCCATCCTGTAGGTTAGAGAAACTCATCAGAAGAAAGTTTCAATCACTTCACTGTTATTTTCTGCAATTCTTATTCTCTTATAGCCGATAATCTTCAGGTCTGAAAGAAAAAATCAACA
ANXA2	NARG2	TATCACCTACCTTTGGTCTTGATGGCTGTTTCAATGTTCAAAGCATCCCGCTCAGCATCAAAGTTAGTATAGGCTTTGACAGACCCATATGCACTTGGGGGTGTAGAGTGCTGAGGTTAA	CTTTTATGTGGAGCCACTCCTTCAGTTTCAACTTGCTGAGCAGGCAAGCAACTGCTTTTGGTTTCCATGGAAACTGGATTCCTGTGGCTGCGTGTAGGCATTCTCGTTCCACCAATCTAA
DNTTIP2	GCLM	GTGCAGATCTGGTAACCACCATCTTTCCGGCTCCCTCGCGACCACCACGACTTCCCTCTTCCCTGGCGCTCCGGAAATGCGTCAGAGAACTGCCTCGAGCGCGTTTTCCGCGCAGATCCG	TACCTTTTGGATCATTGTGAGTCAACAGCTGTATGTCAAATTGTTTAGCAAATGCAGTCAAATCTGGTGGCATCACACAGCAGGAGGCAAGATTAACTTGGTTACTATTTGGTTTTACCT
FAM208A	PSMD6	TGGGAAGAAAAGCAAAGCAAGCCTTCTCACCTGGTGTTTGTTTCTCACCATGTTTCCCCAGCTGGTCTTCTGGGCTTCTTGCATTCCCTCCTGAGGGAAAGCATCCATTAGACTCTCTTC	TTCCAGCAGCTGACTGTATGCATGAATTCTCATTTCTCTTACATAGTATCGATAATGAGGGGCAAAAAGCCAGTCCTTTTTCATTTCCTGTTCCACAACCGCTGCAATGAATAAAATGAC
GGCT	GARS	TCCTCTCTGTCAGCAGGTTGCTGCCGTAGGCAAAGTACAGAAAACTCTCCTCATCTGGACCCGTGACGTCCTTGCAGCCCGAGTTGGCCATATCCCACTACGCCCCTGCACTGGAGCCTG	GTTTTGTTTCTTCGTAGGGAATTCACAATTGAAACTGAAGGGAAAACATTTCAGTTAACAAAAGACATGATCAATGTGAAGAGATTCCAGAAAACACTATATGGTAAATTTGTAAAAATA
GNAO1	RP11-463O9.5	CGGAGGCCAGCGATCTGAACGCAAGAAGTGGATCCATTGCTTCGAGGACGTCACGGCCATCATTTTCTGTGTCGCGCTCAGCGGCTATGACCAGGTGCTCCACGAAGACGAAACCACGGT	CGAAGAGGCCGAAGCGAAGAGGCCTGGTGGGTTGTCTCAACATCCTTTTGCTGAGAATCGAATACGCAGCCGATGAACAGCCAGGAAGGGTGCAAGGAAACCTGAAATACAAATGTTCTC
NOP56	SNRPB	CGACTGTCCTTCTATGAGACTGGAGAGATACCACGAAAGAATCTGGATGTCATGAAGGAAGCAATGGTTCAGGTCAGTTGGGCTTTGCTGGGTGTGGAGTGGCATAGCTAGCTGTTGGAG	GGAGTCCCTCTTCCAGGGGGGATCCCCATTGGGGGACCCATAGGAGGTCTCATACCAGGAGGTGGGCCCATCATGCCTGCAAGAGAAAAGCCCCAAGAATATAGCTCAAGTGTCTATCTT
TBC1D9B	RNF130	GCTGCTTGGATGGTGTTTTCTGGAGGAAGTCAGAGATCCTCTGCACCAAGAAATCACGGTCTTTCAGGTTGGCAAACAGGAATGTCATTTTGCTTTTGGTGCTGATGGACAGGGGGCTGG	TCATTAGCATTCAAGCTAGCTGTGGCTCTGATGATCATGTAGCAGAGTGTGAGGGCACTGAGGAGGCCAAAACTGGCAATAATAAACCATTCTT
AHI1	PSMB1	CAGAATGCAACCATATTTTCAAATGGATGATAAGAAATGTCTCGAATGGGTGACTTGAATGGCAAGTCAGAATACATGGCTACTTGTTCTCCTAAATAAAAAGAGAGATTCAAAAATGTA	ACTTACAATTTGTAACATTTGGGGCTATCCCGCGTATGAATTGAAAACCCTTCACTCAATCGAGTATCAGAAGCAACAATTGCAAAATCTTCTCCAGCAATTGCCAGTATAGTACTGAGG
DLX5	NHLRC3	GTGGTAGGAGCTAGCGTAGCTATAGTCGGCATAAGCTTTGGCTGGGTAGCTCCCGGCGGAGCCGTTCACGCCGTGATACTGATACTGGTAGGGGTTGAGAGCTTTGCCATAGGAAGCCGA	TTTACCGGCTGGATGTGGGTTGGCCTAAGCACCCAGAATATTTTACCGGAACAACATTTTGTGTTGCAGTTGACTCCCTCAATGGATTGGTTTACATAGGTCAAGTAAGTAAATAGAGAT
RGS5	MTHFD1L	CTGAAACCTTACCTTCCTCTGTGAGAGACCCGAAGTGTCACCAATTCAGTTAACTTTCTCCTTTTTCCCTCTGAAGATATCCAGACAGTGCTTTTTAAGCGCTCTGTTTCTAAGAAAAAT	ATCTTGATACCGAAACAGAACAAGTTAAAGGCTTGTTCTAAGTGGACAAGGCTCTCACAGGACCCGATGCAGGTAGGCTGATGTGCTTCAACTTTTTCTCTCTTTGTTTTTTTCCAGTTC
KDM2A	ZNF532	GCCTTCGCTGCCTTGTAGATAAGTTGGAGTCTCTGCCACTGCACAAGAAATGTGTCCCCACAGGGATAGAAGATGAAGATGCTCTCATTGCTGATGTAAAGGTAAGGGTTTGATGTGTTA	CATCACACCAGAGAATCCATCAGCACAAATCTCCCTACACCTGCCCTGAGTGTGGGGCCATCTGCAGGTCGGTGCACTTCCAGACCCACGTCACCAAGAACTGTCTGCACTACACGAGGA
DPP9	ENDOG	CACAAACTGGAAGTCGTGGGGCGCCTTGTTGACAATGAGGCCCGAGTACTTGCGGCTGCCGTGGATGATGCTCCGGAGCCCGTCCCACGAGTGCTTCTGCACCTGGAAGCGGGCGGCCGG	TACCAGGTGCCCCACCTCAACCAGAATGCCTGGAACAACCTGGAGAAATATAGCCGCAGCTTGACCCGCAGCTACCAAAACGTCTATGTCTGCACAGGGCCACTCTTCCTGCCCAGGTAA
TRIM52	NUP133	TGGCTCCTGGATTCTCGGCACACCACACAGATGGCCTCTTTGTCCACCTCACAGAAGAGTTTCAGGGCTTCCTGGTGTTTAAAGCACATGCCCTGATCATTACTCCGGTTTCCCCGATAA	CCTTGCCCCTGAGGCAGGATATGCTGATGAATCTTTCCTGAGCTCTCAGGTATCAACCGAATTAGTTGGCTTCCTGATGAAGACAAAATAAAACTTCCTCCCTGTGAAAAAACATTATGA
AFG3L2	RNPC3	ATCTCACCAATAAAGATCTGCCTGTCGAAACGCCCCGGCCTAAGCAGCGCGGGGTCCAGGATATCTGGTCGATTGGTGCCGGCCAAAATGACGACATTTGTTGTTGTATTAAAACCTGAA	GAAATTGACCACCTGGACTATGGAACTGTGCGTAACAGCTTTGAAAGTGTATTTAAAAATTAAATCTATATGCCTTTAAATCAGTGAATTGGAAACATATTACATGTATTTTAATGATTT
TNFRSF1A	PTMS	TATGGCCTCTCACTCCCCCATTTGGGCTCAGGGCAGTGTGGCAGCGGCAGTGCTGGGGCTTCCCGGGACTCGGTCTGTCCAGGACGTCCCAAGTGCCTTGGGGTGACAGTTGAGGGTTGA	AAGGTGACCTCTTTCTCCTTTGCAGGACCTGAAGGAGAAGAAGGAGAAGGTGGAGGAGAAGGCAAGCCGGAAAGAGCGAAAGAAAGAAGTGGTGGAGGTGTGGAGGGGTGGGGGAGAGGA
BCL11B	PPP2R5C	GTGGTCATCTTCGTCGGGGGTGACTTGGATCCCGATCTCCACCGGCTCGGACACTTTCCTGAGCTCGGAGCGTGAGGAGGGTGGCGGGCTGTCCTTGTCCAGGGCCTTGTCATAGCAGGC	GTGTTGCGTCCTCTTTGACTTTGTTTCTGATCCACTAAGTGACCTAAAGTGGAAGGAAGTAAAACGAGCTGCTTTAAGTGAAATGGTAGAATATATCACCCATAATCGGAATGTGATCAC
GBE1	RYBP	GGAGTCTGGCCAGTTCGGGCACGTCAGCCAGGGCGGCATTGAGCGCCGCCTCGTAGTCCTCGGGCCGAGCCGCGGGAGTCATCGGAGCCGCCATATTCCGCCGCAGTCCAAGTAGCCGAG	GCTTTTCAACTTTCTCCTTCTTCTCCTTTTTAGGGGGTGGTGGGGTGGCATACTGTTGTGCCACTTGTTGTGCCACCAGCTGAGAATTGATCCGAGGTTTTCTGAAATGTTCAAAAAATA
NCOA7	CTA-293F17.1	AAACTCTCTTCTGCCTCTTTAGTTGCAGGATGGCTACTCGTATCCCTCCACACATGATCATCAGTATTTGCCTCCTGTGTCCCAACCGGCCTGAGTCAAGTAAGTGTATGAAAAGAGGTG	TTTCTTTCTAAAGGGCTTCAAAATTTCCCGAAACAGACTTCTGAACTTCATTTTATTCCTCTTGCTACATGGTTGTTCTGGATTAGTATATATATCAACACCTAAAAACAGAGTTACAAA
TRAF2	ITPR1	TCTGTGACGTCACTCCCTTGTAGTTTCAGGACCACGTCAAGACTTGTGGCAAGTGTCGAGTCCCTTGCAGATTCCACGCCATCGGCTGCCTCGAGACGGTGAGTCGGGGGGTCTGAGGTT	GCAGTGATTCTGAAGGAGAACAGAATGAGCTGAGAAACCTGCAGGAGAAGCTGGAGTCCACCATGAAACTTGTCACGAACCTTTCTGGCCAGCTGTCGGAATTAAAGGATCAGGTAAAGA
RTFDC1	RP4-799D16.1	AAGGAAACACTAAAGGTGACAAGCACGATGACCTCCAGCGGGCGCGTTTCATCTGCCCCGTTGTGGGCCTGGAGATGAACGGCCGACACAGGTTAGTGACGGACCTGGGACAGATGATGT	CATCTCAAAGTGCATCGCTCCAATTTCTGCTTCTGTCATCACATCGCCTTTTCCTCCAGCTCCGACTCCTCCTGCATCCATCTGAAAAGGATAATCCAGGATATTCTCCCTATCTCAAGA
ACTR6	DHDDS	AACAACTACGGCTGCGGTGTGGTTGGTGGTGAGATGACGACCTTAGTGCTGGATAATGGAGCTTACAACGCCAAAATCGGTTACAGCCATGAAAATGTGTCGTAAGTACTTTCTTTCTCC	AGATTACCTGGCTGGTGTTTGCTTGTTCTGGAGTGATCTTCTGACTGGAAAAGAACTATGTCATGGATCAAGGAAGGAGAGCTGTCACTTTGGGAGCGGTTCTGTGCCAACATCATAAAG
ERBB2IP	KTN1	AGAGAGATATTCAGCTGGATCCAAAGTGACTGATGAAGGGAAGGAAATCATGTCAAGCGAAGCCTTGAAAAAGCTGCCCTGAGACGGTGTCCCGCCGAAAGGTAATTTTCACGAAAAGTG	CATATTTTATTGTTCTTATTCCTTCAATAGTTATTACAGTAATTTTCCTCTTCTTCTGGCTTTTCATGAAAGAAACATTATATGATGAAGTTCTTGCAAAACAGAAAAGAGAACAAAAGC
FBXO32	ANXA13	TCCATCCGATACACCCACATGTTAATGTTCCCGACCAGCACAGACTTGCCGACTCTTTGGACCAGTGTACATAAGGATGTGTAGAGGGTCTGGAGTAGTTCCCTTATTAGTCTAATGTTT	TAGCAACAAAATATCTCTCATACCCATTCCTTTGCAGGCTTTGTTCAGCTTTTTGGCATCTCGATCCACATCAAAACCCTGAGGACTGCTCGCTTTAGCCTGGAGAAAATAATTGAAAAG
