# Supplementary material for: INTEGRATE: gene fusion discovery using whole genome and transcriptome data
Source: HighWire-hosted journal article supplement (doi:10.1101/gr.186114.114), 2015-11-10
Supplement: Supplemental_Table9.xlsx [file Supplemental_Table9.xlsx]

## Sheet: Sheet1
Supplementary Table 9. Numbers of MiSeq reads and RNA-seq reads supporting validated HCC1395 fusions.
5P	3P	NUM_MiSeq	NUM_RNA-seq
EIF3K	CYP39A1	283	1737
MDH1	RP11-357C3.3	48	403
LMF1	FOXK2	33	210
GS1-124K5.2	RP11-147C23.1	15	14
RNGTT	RPF1	10	31
RP11-83A24.2	KCNQ5	4	35
PLA2R1	RBMS1	306	1821
RAB7A	LRCH3	80	258
SHISA5	RP11-24C3.2	72	34
UNC5C	STPG2	58	156
TMEM104	RAB37	45	216
MAVS	PANK2	38	5
ZNF37BP	CEP164P1	33	42
POU2F1	NME7	26	77
NRL	DHRS4-AS1	25	35
KPNA1	EEFSEC	22	19
NOM1	MNX1-AS2	21	38
EFTUD2	KIF18B	20	60
OSBPL9	RP11-191G24.1	17	25
MFSD3	MROH1	14	115
WARS	DEGS2	11	63
HNRNPUL2	AHNAK	6	11
CCDC117	CTA-292E10.6	5	31
LDLRAD3	PRR5L	5	24
CASD1	GNG11	4	17
RP11-85K15.2	BAZ1A	4	12
TBC1D16	AC012354.6	38	72
FOSL2	BRE	47	209
MANBA	UBE2D3	31	44
SMDT1	NDUFA6-AS1	19	26
RP11-680G10.1	GSE1	11	43
CNPY3	GNMT	9	21
CNPY3	RP3-475N16.1	8	23
GNA12	CARD11	7	24
RBM14	C11orf80	7	5
FARS2	RP3-380B8.4	5	7
FSD1L	SLC44A1	5	18
SIK1	CBS	4	11
PALLD	TSC22D1	9	45
PKD1P5	DOT1L	7	6
EIF4A2	PRPF40A	6	16
DHX36	MATN1-AS1	6	18
POLR2J3	TRO	5	4
TRMT10B	ASNS	5	17
FBXL8	PCBP1-AS1	5	1
NABP1	INTS10	5	5
MBNL2	ENAH	5	27
FOSL2	TOMM70A	4	5
TPT1-AS1	FRYL	4	2
HNRNPR	KPNA2	4	6
LZIC	RAC1	4	3
PCNXL2	ODC1	4	9
RP11-193F5.4	HMGN2	4	22
RPL4	PFDN5	4	4
BCL2L2-PABPN1	RPL30	4	4
DAP3	CMC4	4	13
ANP32B	PTMS	3	4
ATP2A2	RBM39	3	2
BCL2L11	LCMT1	3	1
CLCN6	CRNDE	3	2
CPSF6	SKP2	3	16
NKTR	MED23	3	7
RNGTT	ZC3H13	3	3
SOS2	PEX11A	3	11
UQCRC2	RPL37	3	3
CTSA	TIAL1	3	9
DUSP16	ANAPC11	3	3
EXOSC2	UBL5	3	2
HIST1H2AC	RP11-200A1.1	3	11
IARS	TOX4	3	3
LEMD1	RPL30	3	6
MAPK9	OGFOD3	3	2
PCBD2	NOL10	3	13
PCMTD1	POM121C	3	8
PNISR	KLHDC1	3	9
RAB10	MXI1	3	4
SIRPA	VPRBP	3	20
TJAP1	PLOD3	3	3
TOP2A	GLRX5	3	6
ZFR	ZMYM5	3	5
COMMD1	RP11-390P2.4	2	7
FNDC3B	RBM39	2	1
IQGAP1	RPL30	2	1
NAA15	PLK1	2	2
NEK7	CMC2	2	8
RNF145	PLOD2	2	8
TOX2	POLR1D	2	3
ZNF521	RAB28	2	2
AGPAT5	CTD-2541M15.1	23	3
ERO1A	FERMT2	9	35
CD109	EEF1A1	8	3
SUCO	TBX19	8	16
ZC3H8	SUCLG1	7	26
ZNF37BP	C10orf25	7	25
SLC30A9	OCIAD1	7	20
ADK	VCL	7	1
AC009403.2	POMZP3	6	15
RP11-282O18.3	CDK2AP1	6	17
CAV1	TES	6	8
CLIP4	FAM179A	5	16
MMADHC	EPC2	5	4
POM121	VKORC1L1	5	8
RP11-123O10.4	GRIP1	5	28
RPF1	PRKACB	5	25
ST3GAL1	SLA	5	37
CCDC122	ENOX1	5	13
EIF4H	GPNMB	5	10
CTBP2	BUB3	4	12
ARSJ	MTHFD2L	4	19
ST7	TES	4	14
TOP2B	NGLY1	4	2
ZNF519	RAB31	4	13
BRD1	RP6-109B7.4	3	2
SLC39A11	NSF	3	3
ZHX1	MRPL13	3	7
ANXA2	NARG2	3	5
DNTTIP2	GCLM	3	1
FAM208A	PSMD6	3	4
GGCT	GARS	3	7
GNAO1	RP11-463O9.5	3	27
NOP56	SNRPB	3	8
TBC1D9B	RNF130	3	3
AHI1	PSMB1	2	5
DLX5	NHLRC3	6	12
RGS5	MTHFD1L	6	8
KDM2A	ZNF532	5	12
DPP9	ENDOG	4	7
TRIM52	NUP133	4	29
AFG3L2	RNPC3	3	12
TNFRSF1A	PTMS	3	9
BCL11B	PPP2R5C	2	3
GBE1	RYBP	2	13
NCOA7	CTA-293F17.1	5	3
TRAF2	ITPR1	5	15
RTFDC1	RP4-799D16.1	5	28
ACTR6	DHDDS	2	9
ERBB2IP	KTN1	2	12
FBXO32	ANXA13	4	4
